# Supplementary material for: Lewis acid-catalyzed [4 + 2] cycloaddition of donor–acceptor cyclobutanes with iminooxindoles: access to spiro[piperidine-3,2′-oxindoles]
Source: Royal Society of Chemistry journal article supplement (doi:10.1039/d2ra04730f), 2022-01-01
Supplement: d2ra04730f1.pdf [file d2ra04730f1.pdf]

Supporting information

**Lewis Acid-Catalyzed [4 + 2] Cycloaddition of  
Donor–Acceptor Cyclobutanes with Iminooxindoles: Access  
to Spiro[piperidine-3,2'-oxindoles]**

Zuliang Chen,<sup>\*ab</sup> Keyi Yan,<sup>†a</sup> Hui Luo,<sup>†a</sup> Jun Yan,<sup>a</sup> and Yang Zeng<sup>a</sup>

<sup>a</sup> College of Chemistry and Bio-engineering, Yichun University, Yichun 336000 (P.R. China)

<sup>b</sup> Key Laboratory of Jiangxi University for Applied Chemistry and Chemical Biology, Yichun University  
336000 (P.R. China)

<sup>†</sup> These authors contributed equally to this work.

Corresponding author's e-mail : [zai81789@163.com](mailto:zai81789@163.com) (Zuliang Chen)

**General information.**

<sup>1</sup>H NMR spectra, <sup>13</sup>C NMR spectra were recorded on a Bruker 400 MHz spectrometer in chloroform-d<sub>3</sub> or dmsO-d<sub>6</sub>. All signals are reported in ppm with the internal TMS signal at 0 ppm as a standard. The data is being reported as (s = singlet, d = doublet, t = triplet, m = multiplet or unresolved, br = broad signal, coupling constant(s) in Hz, integration). All reactions were carried out under an atmosphere of nitrogen in flame-dried glassware with magnetic stirring. All solvents were freshly distilled from CaH<sub>2</sub> prior to use. Lewis-acid purchased from Accela ChemBio Co. Ltd or J&K or Energy Chemical Company were used directly. 4 Å molecular sieves purchased from Sinopharm Chemical Reagent Co.,Ltd were powdered and dried at 300 °C in muffle furnace for 8-10 hours prior to use. Bisoxazoline ligand (bis(S)-4-isopropyl-4,5-dihydrooxazol-2-yl)methane) was purchased from Energy Chemical Company and used directly.

## Synthesis of substrates.

Cyclobutanes **2** were synthesized according to our previous method.<sup>1</sup> Iminooxindoles **1** were synthesized according to the literature, and the spectral data refer to the literature.<sup>2</sup> Chiral cyclobutane **2a** (ee = 85%) was synthesized according to the literature by using bis(S)-4-isopropyl-4,5-dihydrooxazol-2-yl)methane as ligand.<sup>3</sup>

### Iminooxindoles **1**:

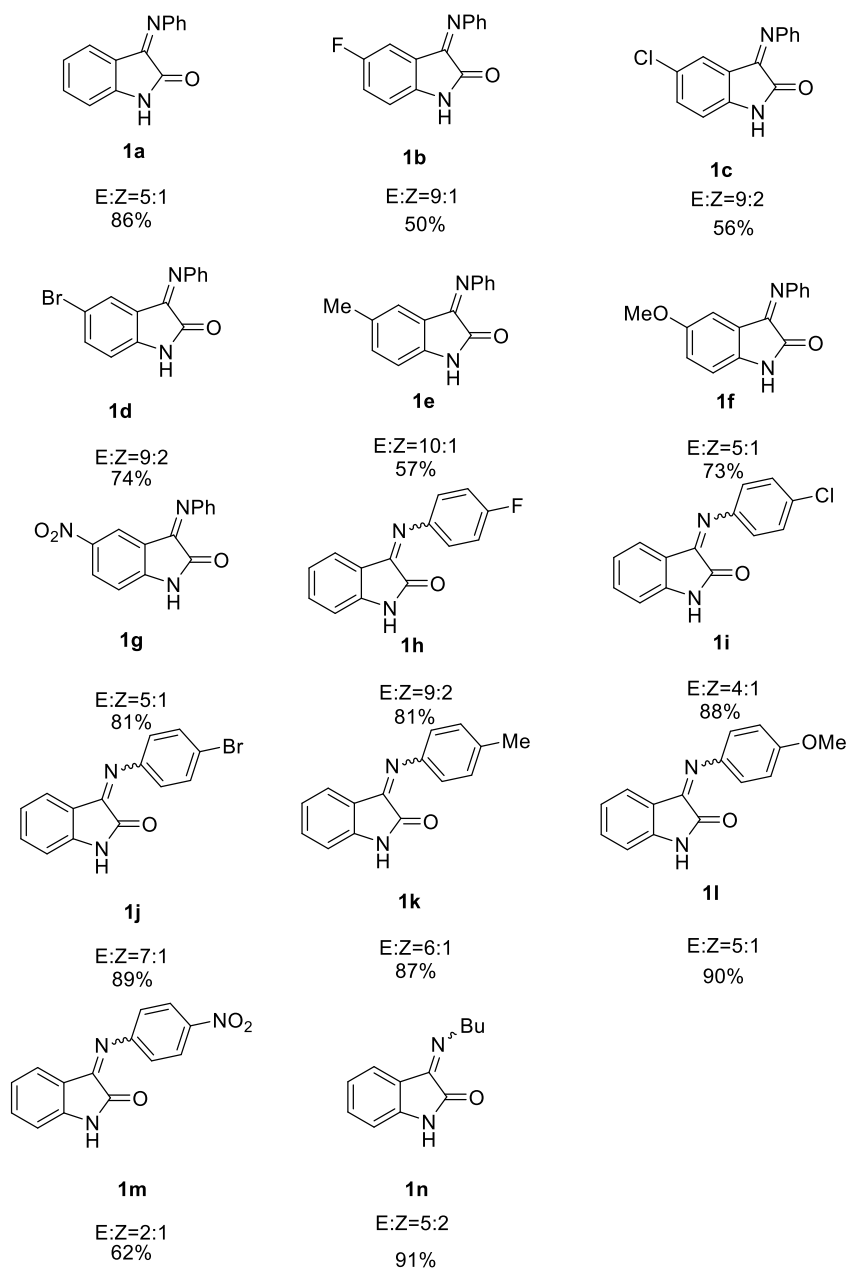

## Cyclobutanes **2**:

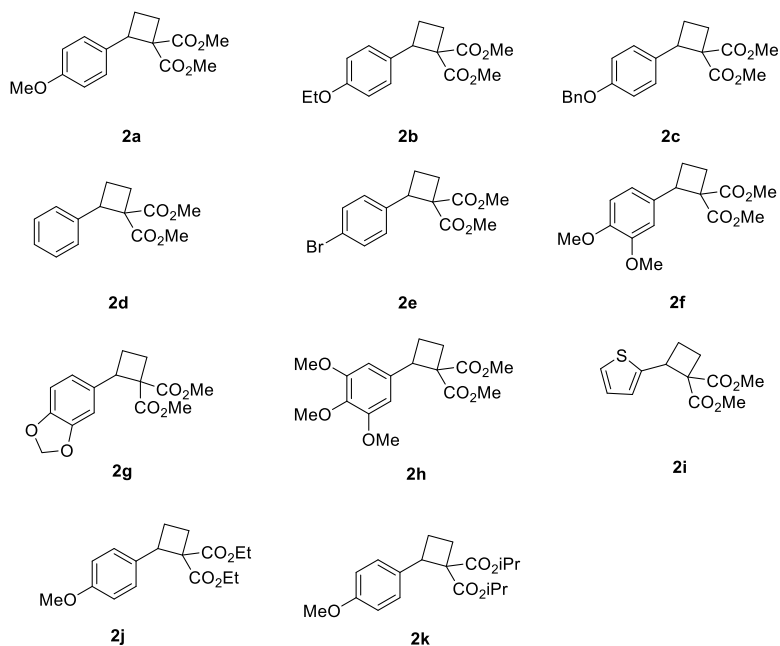

## Reference

1. H. Luo, J. Yan, Z. Chen, Y. Wei, B. Chen and Y. Liu, *ChemistrySelect*. 2020, **5**, 4074-4077.
2. A. A. Akaev, S. I. Bezzubov, V. G. Desyatkin, N. S. Vorobyeva, A. G. Majouga, M. Y. Melnikov and E. M. Budynina, *J. Org. Chem.*, 2019, **84**, 3340-3356.
3. J. Hu, L. Feng, L. Wang, Z. Xie, Y. Tang and X. Li, *J. Am. Chem. Soc.*, 2016, **138**, 13151-13154.

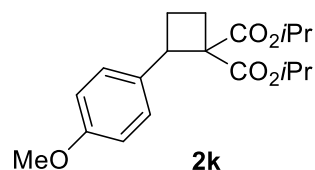

Cyclobutane **2k**, colorless oil.  $^1\text{H}$  NMR (400 MHz,  $\text{CDCl}_3$ )  $\delta$  7.24 (d,  $J = 8.8$  Hz, 2 H), 6.81 (d,  $J = 8.8$  Hz, 2 H), 5.15-5.05 (m, 1 H), 4.66-4.60 (m, 1 H), 4.29 (t,  $J = 9.6$  Hz, 1 H), 3.77 (s, 3 H), 2.67-2.48 (m, 2 H), 2.17-2.09 (m, 2 H), 1.25 (d,  $J = 6.4$  Hz, 3 H), 1.23 (d,  $J = 6.4$  Hz, 3 H), 0.99 (d,  $J = 6.4$  Hz, 3 H), 0.58 (d,  $J = 6.4$  Hz, 3 H);  $^{13}\text{C}$  NMR (100 MHz,  $\text{CDCl}_3$ )  $\delta$  171.4, 169.1, 158.5, 131.5, 129.0, 113.3, 68.4, 59.5, 55.3, 44.1, 25.4, 21.7, 21.6, 21.5, 21.4, 20.8, 20.7 ; HRMS-ESI:  $[\text{M}+\text{Na}]^+$  calcd for  $\text{C}_{19}\text{H}_{26}\text{O}_5\text{Na}$ : 357.1678, found: 357.1678.

## 1. Typical procedure for Sc(OTf)<sub>3</sub> catalyzed [4+2] cycloaddition reaction.

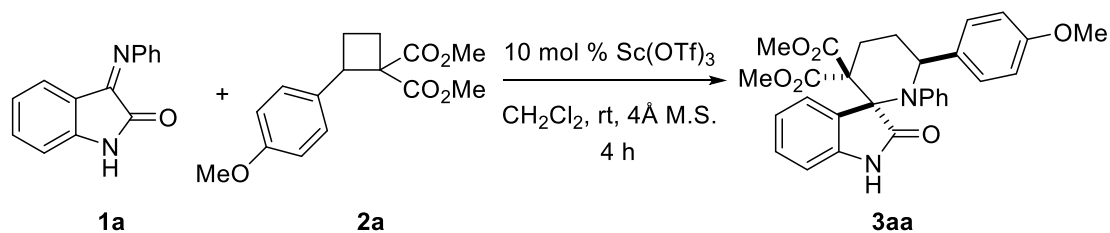

A flame-dried schlenk tube (25 mL) was evacuated and recharged with N<sub>2</sub> for 3 times. Under N<sub>2</sub>, the tube was charged with 10 mol % Sc(OTf)<sub>3</sub>, 60 mg of activated 4 Å molecular sieves powder (M S), iminoindole **1a** (0.22 mmol, 49 mg), cyclobutane **2a** (0.2 mmol, 56 mg), dry CH<sub>2</sub>Cl<sub>2</sub> (1.5 mL) at room temperature (rt). The reaction mixture was stirred at rt for 4 hours until the reaction was complete (monitored by TLC, hexanes:AcOEt = 5:1). The reaction mixture was passed over a plug of silica gel with 10 mL of CH<sub>2</sub>Cl<sub>2</sub>. The solvent was removed under reduced pressure and the residue was purified by silica gel column chromatography, eluting with (hexanes:AcOEt = 4:1) to afford 82 mg (82%) of **3aa**, white solid, m.p. 228-230 °C. <sup>1</sup>H NMR (400 MHz, CDCl<sub>3</sub>) δ 7.43 (d, *J* = 7.6 Hz, 1 H), 7.34 (s, 1H), 7.25-7.10 (m, 2 H), 6.99-6.83 (m, 3 H), 6.76-6.55 (m, 5 H), 6.38 (d, *J* = 7.6 Hz, 1 H), 5.20 (dd, *J* = 12.0 Hz, 4.0 Hz, 1 H), 3.85 (s, 3 H), 3.64 (s, 3 H), 3.53 (s, 3 H), 3.35 (td, *J* = 14.0 Hz, 4.4 Hz, 1 H), 2.63-2.48 (m, 1 H), 2.42-2.33 (m, 1 H), 2.02-1.91 (m, 1 H); <sup>13</sup>C NMR (100 MHz, CDCl<sub>3</sub>) δ 177.1, 170.0, 169.0, 157.8, 145.8, 140.9, 136.3, 129.3, 129.0, 128.8, 127.5, 126.9, 125.0, 121.4, 113.0, 108.8, 68.9, 58.9, 58.8, 54.9, 52.5, 52.1, 31.4, 26.5; HRMS-TOF-ES<sup>+</sup>: [M+H]<sup>+</sup> calcd for C<sub>29</sub>H<sub>28</sub>N<sub>2</sub>O<sub>6</sub>H: 501.2025, found: 501.2026.

## 1. Synthesis of 3ab

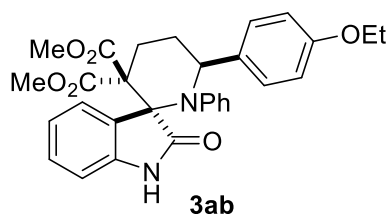

The reaction of iminoindole **1a** (0.22 mmol, 49 mg), cyclobutane **2b** (0.2 mmol, 58 mg) and 60 mg of 4 Å M.S. and 10 mol % Sc(OTf)<sub>3</sub> in dry CH<sub>2</sub>Cl<sub>2</sub> (2.0 mL) was carried out at rt for 6 h, eluting with (hexanes:AcOEt = 4:1) to afford 74 mg (72%) of

**3ab**, white solid, m.p. 233-235 °C. <sup>1</sup>H NMR (400 MHz, CDCl<sub>3</sub>) δ 7.43 (d, *J* = 7.6 Hz, 1 H), 7.33 (s, 1 H), 7.25-7.10 (m, 2 H), 7.00-6.83 (m, 3 H), 6.75-6.53 (m, 5 H), 6.37 (d, *J* = 7.6 Hz, 1 H), 5.19 (dd, *J* = 12.0 Hz, 4.0 Hz, 1 H), 3.89-3.80 (m, 5 H), 3.53 (s, 3 H), 3.35 (td, *J* = 14.0 Hz, 4.4 Hz, 1 H), 2.62-2.48 (m, 1 H), 2.44-2.33 (m, 1 H), 2.00-1.91 (m, 1 H), 1.29 (t, *J* = 6.8 Hz, 3 H); <sup>13</sup>C NMR (100 MHz, CDCl<sub>3</sub>) δ 177.1, 170.0, 169.0, 157.2, 145.8, 140.9, 136.1, 129.3, 129.0, 128.8, 127.4, 126.9, 125.0, 121.4, 113.5, 108.8, 68.9, 63.0, 58.9, 52.5, 52.1, 31.4, 26.6, 14.8; HRMS-TOF-ES<sup>+</sup>: [M+H]<sup>+</sup> calcd for C<sub>30</sub>H<sub>30</sub>N<sub>2</sub>O<sub>6</sub>H: 515.2182, found: 515.2179.

## 2. Synthesis of **3ac**

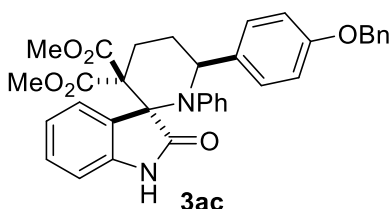

The reaction of iminooxindole **1a** (0.22 mmol, 49 mg), cyclobutane **2c** (0.2 mmol, 71 mg) and 60 mg of 4Å M.S. and 10 mol % Sc(OTf)<sub>3</sub> in dry CH<sub>2</sub>Cl<sub>2</sub> (2.0 mL) was carried out at rt for 6 h, eluting with (hexanes:AcOEt = 4:1) to afford 77 mg (67%) of **3ac**, white solid, m.p. 232-234 °C. <sup>1</sup>H NMR (400 MHz, CDCl<sub>3</sub>) δ 7.43 (d, *J* = 7.6 Hz, 1 H), 7.35-7.16 (m, 8 H), 7.00-6.83 (m, 3 H), 6.75-6.61 (m, 5 H), 6.37 (d, *J* = 7.6 Hz, 1 H), 5.20 (dd, *J* = 12.0 Hz, 4.0 Hz, 1 H), 4.87 (s, 2 H), 3.85 (s, 3 H), 3.53 (s, 3 H), 3.35 (td, *J* = 14.0 Hz, 4.4 Hz, 1 H), 2.62-2.48 (m, 1 H), 2.42-2.33 (m, 1 H), 2.02-1.92 (m, 1 H); <sup>13</sup>C NMR (100 MHz, CDCl<sub>3</sub>) δ 177.1, 170.0, 169.0, 157.1, 145.8, 140.9, 137.1, 136.6, 129.4, 128.8, 128.4, 127.8, 127.5, 127.4, 126.9, 125.1, 121.4, 113.9, 108.8, 69.8, 68.9, 58.9, 52.5, 52.1, 31.4, 26.5; HRMS-TOF-ES<sup>+</sup>: [M+H]<sup>+</sup> calcd for C<sub>35</sub>H<sub>32</sub>N<sub>2</sub>O<sub>6</sub>H: 577.2339, found: 577.2340.

## 3. Synthesis of **3ag**

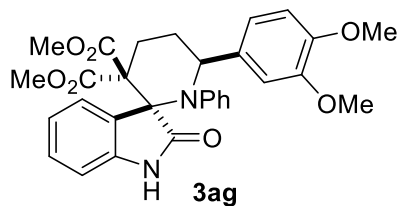

The reaction of iminooxindole **1a** (0.22 mmol, 49 mg), cyclobutane **2g** (0.2 mmol, 62 mg) and 60 mg of 4Å M.S. and 10 mol % Sc(OTf)<sub>3</sub> in dry CH<sub>2</sub>Cl<sub>2</sub> (2.0 mL) was carried out at rt for 4 h, eluting with (CH<sub>2</sub>Cl<sub>2</sub>:MeOH = 80:1) to afford 92 mg (86%) of **3ag**, white solid, m.p. 211-213 °C. <sup>1</sup>H NMR (400 MHz, CDCl<sub>3</sub>) δ 7.44 (d, *J* = 7.6 Hz, 1 H), 7.33 (s, 1 H), 7.02-6.85 (m, 4 H), 6.81-6.61 (m, 4 H), 6.52 (d, *J* = 7.6 Hz, 1 H), 6.37 (d, *J* = 7.6 Hz, 1 H), 5.20 (dd, *J* = 12.0 Hz, 4.0 Hz, 1 H), 3.84 (s, 3 H), 3.81 (s, 3 H), 3.71 (s, 3 H), 3.53 (s, 3 H), 3.35 (td, *J* = 14.0 Hz, 4.4 Hz, 1 H), 2.62-2.48 (m, 1 H), 2.42-2.33 (m, 1 H), 2.04-1.94 (m, 1 H); <sup>13</sup>C NMR (100 MHz, CDCl<sub>3</sub>) δ 177.0, 170.0, 168.9, 148.1, 147.1, 145.7, 140.9, 136.8, 129.0, 128.8, 127.4, 126.9, 125.1, 121.4, 120.4, 111.5, 110.0, 108.8, 68.9, 59.1, 58.9, 55.5, 52.5, 52.1, 31.4, 26.5; HRMS-TOF-ES<sup>+</sup>: [M+H]<sup>+</sup> calcd for C<sub>30</sub>H<sub>30</sub>N<sub>2</sub>O<sub>7</sub>H: 531.2133, found: 531.2130.

#### 4. Synthesis of **3ah**

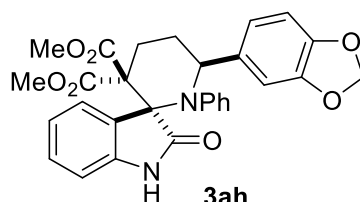

The reaction of iminooxindole **1a** (0.22 mmol, 49 mg), cyclobutane **2h** (0.2 mmol, 58.4 mg) and 60 mg of 4Å M.S. and 20 mol % Sc(OTf)<sub>3</sub> in dry CH<sub>2</sub>Cl<sub>2</sub> (2.0 mL) was carried out at rt for 19 h, eluting with (CH<sub>2</sub>Cl<sub>2</sub>:MeOH = 80:1) to afford 72 mg (70%) of **3ah**, white solid, m.p. 212-214 °C.. <sup>1</sup>H NMR (400 MHz, CDCl<sub>3</sub>) δ 7.43 (d, *J* = 7.6 Hz, 1 H), 7.23 (s, 1 H), 6.99-6.85 (m, 4 H), 6.77-6.61 (m, 4 H), 6.45 (d, *J* = 8.0 Hz, 1 H), 6.36 (dd, *J* = 7.6 Hz, 0.8 Hz, 1 H), 5.78 (s, 2 H), 5.17 (dd, *J* = 12.0 Hz, 4.0 Hz, 1 H), 3.85 (s, 3 H), 3.52 (s, 3 H), 3.34 (td, *J* = 14.0 Hz, 4.4 Hz, 1 H), 2.62-2.45 (m, 1 H), 2.42-2.33 (m, 1 H), 2.02-1.93 (m, 1 H); <sup>13</sup>C NMR (100 MHz, CDCl<sub>3</sub>) δ 177.0, 170.0, 168.9, 145.7, 145.6, 140.9, 138.3, 129.0, 128.8, 127.5, 126.9, 125.1, 121.6, 121.5,

108.7, 100.5, 68.9, 59.3, 58.9, 52.5, 52.1, 31.5, 26.5; HRMS-TOF-ES<sup>+</sup>: [M+H]<sup>+</sup> calcd for C<sub>29</sub>H<sub>26</sub>N<sub>2</sub>O<sub>7</sub>H: 515.1818, found: 515.1815.

## 5. Synthesis of **3ai**

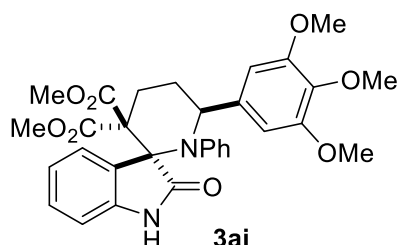

The reaction of iminoindole **1a** (0.22 mmol, 49 mg), cyclobutane **2i** (0.2 mmol, 68 mg) and 60 mg of 4Å M.S. and 30 mol % Sc(OTf)<sub>3</sub> in dry CH<sub>2</sub>Cl<sub>2</sub> (2.0 mL) was carried out at rt for 13 h, eluting with (CH<sub>2</sub>Cl<sub>2</sub>:MeOH = 80:1) to afford 75 mg (67%) of **3ai**, white solid, m.p. 213-215 °C. <sup>1</sup>H NMR (400 MHz, CDCl<sub>3</sub>) δ 7.45 (d, *J* = 7.6 Hz, 1 H), 7.33 (s, 1 H), 7.02-6.85 (m, 4 H), 6.75-6.55 (m, 5 H), 6.38 (d, *J* = 7.6 Hz, 1 H), 5.20 (dd, *J* = 12.0 Hz, 4.0 Hz, 1 H), 3.84 (s, 3 H), 3.74 (s, 6 H), 3.68 (s, 3 H), 3.52 (s, 3 H), 3.34 (td, *J* = 14.0 Hz, 4.4 Hz, 1 H), 2.56-2.45 (m, 1 H), 2.42-2.33 (m, 1 H), 2.04-1.97 (m, 1 H); <sup>13</sup>C NMR (100 MHz, CDCl<sub>3</sub>) δ 177.0, 170.0, 168.9, 152.4, 145.6, 141.0, 139.9, 136.2, 129.0, 128.9, 127.5, 126.9, 125.2, 121.5, 108.9, 105.6, 69.0, 60.7, 59.8, 58.9, 56.0, 52.6, 52.1, 31.4, 26.6; HRMS-TOF-ES<sup>+</sup>: [M+H]<sup>+</sup> calcd for C<sub>31</sub>H<sub>32</sub>N<sub>2</sub>O<sub>8</sub>H: 561.2237, found: 561.2234.

## 6. Synthesis of **3aj**

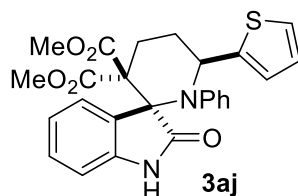

The reaction of iminoindole **1a** (0.22 mmol, 49 mg), cyclobutane **2j** (0.2 mmol, 51 mg) and 60 mg of 4Å M.S. and 20 mol % Sc(OTf)<sub>3</sub> in dry CH<sub>2</sub>Cl<sub>2</sub> (2.0 mL) was carried out at rt for 5.5 h, eluting with (hexanes:AcOEt:DCM = 4:1:1) to afford 44 mg (46%) of **3aj**, white solid, m.p. 240-242 °C. <sup>1</sup>H NMR (400 MHz, CDCl<sub>3</sub>) δ 7.36 (d, *J* = 8.0 Hz, 1 H), 7.14 (s, 1 H), 7.00-6.92 (m, 2 H), 6.90-6.65 (m, 5 H), 6.64 (dd, *J* = 3.6

Hz, 1.2 Hz, 1 H), 6.60-6.54 (m, 1 H), 6.38 (d,  $J = 7.6$  Hz, 1 H), 5.59 (dd,  $J = 12.0$  Hz, 4.0 Hz, 1 H), 3.87 (s, 3 H), 3.54 (s, 3 H), 3.32 (td,  $J = 14.0$  Hz, 4.4 Hz, 1 H), 2.81-2.67 (m, 1 H), 2.45-2.37 (m, 1 H), 2.19-2.11 (m, 1 H);  $^{13}\text{C}$  NMR (100 MHz,  $\text{CDCl}_3$ )  $\delta$  177.1, 169.9, 168.9, 148.1, 145.5, 140.9, 128.8, 128.7, 127.7, 126.9, 125.6, 125.4, 125.3, 124.1, 121.5, 108.8, 68.9, 58.8, 55.1, 52.6, 52.2, 32.3, 26.5; HRMS-TOF-ES<sup>+</sup>:  $[\text{M}+\text{H}]^+$  calcd for  $\text{C}_{26}\text{H}_{24}\text{N}_2\text{O}_5\text{SH}$ : 477.1484, found: 477.1485.

## 7. Synthesis of **3ak**

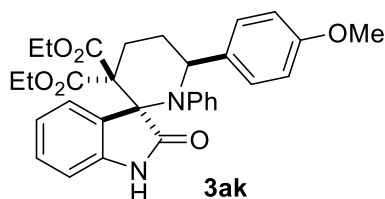

The reaction of iminoindole **1a** (0.22 mmol, 49 mg), cyclobutane **2k** (0.2 mmol, 61 mg) and 60 mg of 4Å M.S. and 10 mol %  $\text{Sc}(\text{OTf})_3$  in dry  $\text{CH}_2\text{Cl}_2$  (2.0 mL) was carried out at rt for 13 h, eluting with (hexanes:AcOEt = 4:1) to afford 61 mg (58%) of **3ak**, white solid, m.p. 220-222 °C.  $^1\text{H}$  NMR (400 MHz,  $\text{CDCl}_3$ )  $\delta$  7.58 (d,  $J = 7.6$  Hz, 1 H), 7.35 (s, 1 H), 7.25-7.10 (m, 2 H), 6.99-6.81 (m, 3 H), 6.78-6.55 (m, 5 H), 6.36 (d,  $J = 7.6$  Hz, 1 H), 5.22 (dd,  $J = 11.6$  Hz, 3.6 Hz, 1 H), 4.40-4.23 (m, 2 H), 4.02-3.88 (m, 2 H), 3.64 (s, 3 H), 3.40 (td,  $J = 14.0$  Hz, 4.4 Hz, 1 H), 2.48-2.32 (m, 2 H), 2.01-1.91 (m, 1 H), 1.30 (t,  $J = 7.2$  Hz, 3 H), 0.96 (t,  $J = 7.2$  Hz, 3 H);  $^{13}\text{C}$  NMR (100 MHz,  $\text{CDCl}_3$ )  $\delta$  177.1, 169.4, 168.6, 157.8, 146.0, 140.9, 136.4, 129.3, 129.2, 128.6, 128.1, 126.9, 125.0, 121.4, 113.0, 108.7, 69.1, 61.3, 61.0, 58.9, 54.9, 31.6, 26.4, 14.0, 13.4; HRMS-TOF-ES<sup>+</sup>:  $[\text{M}+\text{H}]^+$  calcd for  $\text{C}_{31}\text{H}_{32}\text{N}_2\text{O}_6\text{H}$ : 529.2339, found: 529.2337.

## 8. Synthesis of **3al**

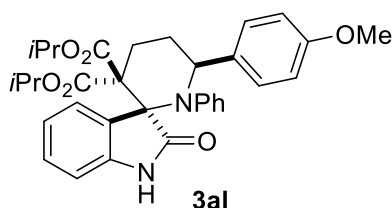



The reaction of iminooxindole **1a** (0.22 mmol, 49 mg), cyclobutane **2l** (0.2 mmol, 67 mg) and 60 mg of 4Å M.S. and 10 mol % Sc(OTf)<sub>3</sub> in dry CH<sub>2</sub>Cl<sub>2</sub> (2.0 mL) was carried out at rt for 13 h, eluting with (hexanes:AcOEt = 4:1) to afford 79 mg (70%) of **3al**, white solid, m.p. 231-233 °C. <sup>1</sup>H NMR (400 MHz, CDCl<sub>3</sub>) δ 7.76 (d, *J* = 7.6 Hz, 1 H), 7.32-7.14 (m, 3 H), 6.99-6.82 (m, 3 H), 6.78-6.55 (m, 5 H), 6.33 (d, *J* = 7.6 Hz, 1 H), 5.28-5.20 (m, 2 H), 4.85-4.75 (m, 1 H), 3.64 (s, 3 H), 3.46 (td, *J* = 14.0 Hz, 4.4 Hz, 1 H), 2.37-2.23 (m, 2 H), 2.01-1.94 (m, 1 H), 1.32 (d, *J* = 6.0 Hz, 3 H), 1.25 (d, *J* = 6.0 Hz, 3 H), 1.01 (d, *J* = 6.0 Hz, 3 H), 0.82 (d, *J* = 6.0 Hz, 3 H); <sup>13</sup>C NMR (100 MHz, CDCl<sub>3</sub>) δ 176.8, 168.7, 168.0, 157.8, 146.1, 140.7, 136.5, 129.3, 129.2, 128.9, 128.5, 126.9, 125.0, 121.1, 113.0, 108.6, 69.3, 68.8, 68.7, 59.0, 58.9, 54.9, 31.8, 26.4, 21.7, 21.6, 21.2, 20.7; HRMS-TOF-ES<sup>+</sup>: [M+H]<sup>+</sup> calcd for C<sub>33</sub>H<sub>36</sub>N<sub>2</sub>O<sub>6</sub>H: 557.2654, found: 557.2653.

## 9. Synthesis of **3ba**

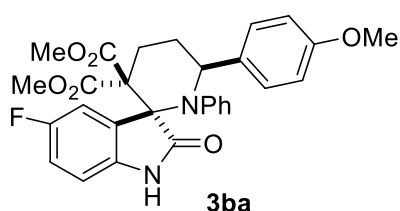

The reaction of iminooxindole **1b** (0.22 mmol, 53 mg), cyclobutane **2a** (0.2 mmol, 56 mg) and 60 mg of 4Å M.S. and 10 mol % Sc(OTf)<sub>3</sub> in dry CH<sub>2</sub>Cl<sub>2</sub> (2.0 mL) was carried out at rt for 4 h, eluting with (hexanes:AcOEt = 4:1) to afford 79 mg (76%) of **3ba**, white solid, m.p. 240-242 °C. <sup>1</sup>H NMR (400 MHz, CDCl<sub>3</sub>) δ 7.38 (s, 1 H), 7.33-7.15 (m, 3 H), 7.00-6.55 (m, 7 H), 6.31 (dd, *J* = 8.4, 4.0 Hz, 1 H), 5.17 (dd, *J* = 12.0 Hz, 4.0 Hz, 1 H), 3.86 (s, 3 H), 3.64 (s, 3 H), 3.53 (s, 3 H), 3.38 (td, *J* = 14.0 Hz, 4.4 Hz, 1 H), 2.53-2.31 (m, 2 H), 2.02-1.92 (m, 1 H); <sup>13</sup>C NMR (100 MHz, CDCl<sub>3</sub>) δ 177.2, 169.9, 168.7, 158.3 (d, *J* = 237 Hz), 157.9, 145.7, 136.8, 135.9, 130.7 (d, *J* = 8.2 Hz), 129.3, 127.2, 125.3, 115.8 (d, *J* = 25.7 Hz), 115.1 (d, *J* = 23.5 Hz), 113.0, 109.0 (d, *J* = 8.0 Hz), 69.4, 59.0, 54.9, 52.6, 52.3, 31.4, 26.4; <sup>19</sup>F NMR (300 MHz, CDCl<sub>3</sub>) δ -121.1; HRMS-TOF-ES<sup>+</sup>: [M+H]<sup>+</sup> calcd for C<sub>29</sub>H<sub>27</sub>FN<sub>2</sub>O<sub>6</sub>H: 519.1931, found: 519.1927.

## 10. Synthesis of 3ca

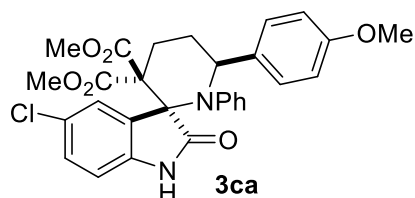

The reaction of iminooxindole **1c** (0.22 mmol, 57 mg), cyclobutane **2a** (0.2 mmol, 56 mg) and 60 mg of 4Å M.S. and 10 mol % Sc(OTf)<sub>3</sub> in dry CH<sub>2</sub>Cl<sub>2</sub> (2.0 mL) was carried out at rt for 4 h, eluting with (hexanes:AcOEt = 4:1) to afford 77 mg (72%) of **3ca**, white solid, 243-245 °C. <sup>1</sup>H NMR (400 MHz, CDCl<sub>3</sub>) δ 7.50 (s, 1 H), 7.42 (d, *J* = 2.0 Hz, 1 H), 7.25-7.10 (m, 2 H), 6.95 (dd, *J* = 8.4, 2.0 Hz, 1 H), 6.78-6.55 (m, 6 H), 6.31 (d, *J* = 8.4 Hz, 1 H), 5.14 (dd, *J* = 12.0 Hz, 4.0 Hz, 1 H), 3.87 (s, 3 H), 3.64 (s, 3 H), 3.55 (s, 3 H), 3.30 (td, *J* = 14.0 Hz, 4.4 Hz, 1 H), 2.65-2.51 (m, 1 H), 2.45-2.35 (m, 1 H), 2.02-1.92 (m, 1 H); <sup>13</sup>C NMR (100 MHz, CDCl<sub>3</sub>) δ 177.0, 170.0, 168.7, 157.9, 145.5, 139.6, 135.9, 130.8, 129.3, 128.6, 127.9, 127.1, 126.8, 125.3, 113.0, 109.7, 69.0, 58.9, 58.8, 54.9, 52.6, 52.2, 31.2, 26.5; HRMS-TOF-ES<sup>+</sup>: [M+H]<sup>+</sup> calcd for C<sub>29</sub>H<sub>27</sub>ClN<sub>2</sub>O<sub>6</sub>H: 535.1636, found: 535.1633.

## 11. Synthesis of 3da

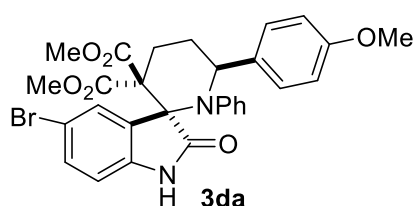

The reaction of iminooxindole **1d** (0.22 mmol, 66 mg), cyclobutane **2a** (0.2 mmol, 56 mg) and 60 mg of 4Å M.S. and 10 mol % Sc(OTf)<sub>3</sub> in dry CH<sub>2</sub>Cl<sub>2</sub> (2.0 mL) was carried out at rt for 4 h, eluting with (hexanes:AcOEt = 4:1) to afford 77 mg (67%) of **3da**, white solid, 250-252 °C. <sup>1</sup>H NMR (400 MHz, CDCl<sub>3</sub>) δ 7.57 (s, 1 H), 7.52 (d, *J* = 2.0 Hz, 1 H), 7.25-7.10 (m, 2 H), 7.09 (dd, *J* = 8.4, 2.0 Hz, 1 H), 6.90-6.55 (m, 6 H), 6.27 (d, *J* = 8.4 Hz, 1 H), 5.14 (dd, *J* = 12.0 Hz, 3.6 Hz, 1 H), 3.87 (s, 3 H), 3.64 (s, 3

H), 3.56 (s, 3 H), 3.28 (td,  $J = 14.0$  Hz, 4.4 Hz, 1 H), 2.69-2.55 (m, 1 H), 2.45-2.35 (m, 1 H), 2.00-1.90 (m, 1 H);  $^{13}\text{C}$  NMR (100 MHz,  $\text{CDCl}_3$ )  $\delta$  176.8, 170.0, 168.7, 157.9, 145.5, 140.1, 135.9, 131.4, 131.1, 130.6, 129.3, 127.1, 125.3, 114.0, 113.0, 110.2, 68.9, 58.9, 58.7, 54.9, 52.6, 52.2, 31.2, 26.5; HRMS-TOF-ES<sup>+</sup>:  $[\text{M}+\text{H}]^+$  calcd for  $\text{C}_{29}\text{H}_{27}^{79}\text{BrN}_2\text{O}_6\text{H}$ : 579.1131, found: 579.1130.

## 12. Synthesis of 3ea

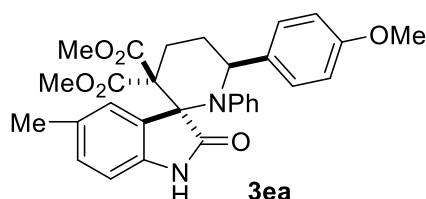

The reaction of iminooxindole **1e** (0.22 mmol, 52 mg), cyclobutane **2a** (0.2 mmol, 56 mg) and 60 mg of 4Å M.S. and 10 mol %  $\text{Sc}(\text{OTf})_3$  in dry  $\text{CH}_2\text{Cl}_2$  (2.0 mL) was carried out at rt for 2.5 h, eluting with (hexanes:AcOEt = 4:1) to afford 69 mg (67%) of **3ea**, white solid, m.p. 245-247 °C.  $^1\text{H}$  NMR (400 MHz,  $\text{CDCl}_3$ )  $\delta$  7.35-7.15 (m, 4 H), 6.87-6.54 (m, 7 H), 6.25 (d,  $J = 8.0$  Hz, 1 H), 5.19 (dd,  $J = 12.0$  Hz, 3.6 Hz, 1 H), 3.85 (s, 3 H), 3.64 (s, 3 H), 3.55 (s, 3 H), 3.30 (td,  $J = 14.0$  Hz, 4.4 Hz, 1 H), 2.68-2.60 (m, 1 H), 2.45-2.35 (m, 1 H), 2.27 (s, 3 H), 2.00-1.91 (m, 1 H);  $^{13}\text{C}$  NMR (100 MHz,  $\text{CDCl}_3$ )  $\delta$  177.2, 170.1, 169.1, 157.8, 145.8, 138.6, 136.4, 130.5, 139.3, 129.0 (2C), 128.0, 126.8, 125.0, 68.9, 58.8, 58.7, 54.9, 52.5, 52.0, 31.4, 26.6, 21.3; HRMS-TOF-ES<sup>+</sup>:  $[\text{M}+\text{H}]^+$  calcd for  $\text{C}_{30}\text{H}_{30}\text{N}_2\text{O}_6\text{H}$ : 515.2182, found: 515.2180.

## 13. Synthesis of 3fa

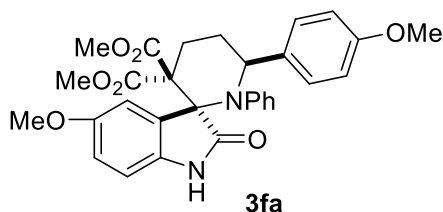

The reaction of iminooxindole **1f** (0.22 mmol, 55.4 mg), cyclobutane **2a** (0.2 mmol, 56 mg) and 60 mg of 4Å M.S. and 10 mol %  $\text{Sc}(\text{OTf})_3$  in dry  $\text{CH}_2\text{Cl}_2$  (2.0 mL) was carried out at rt for 13 h, eluting with (hexanes:AcOEt = 4:1) to afford 71 mg (67%)

of **3fa**, white solid, 214-216 °C. <sup>1</sup>H NMR (400 MHz, CDCl<sub>3</sub>) δ 7.25-7.12 (m, 4 H), 7.00-6.88 (m, 1 H), 6.77-6.69 (m, 2 H), 6.66-6.61 (m, 1 H), 6.58-6.55 (m, 2 H), 6.53-6.48 (m, 1 H), 6.26 (d, *J* = 8.4 Hz, 1 H), 5.19 (dd, *J* = 12.0 Hz, 3.6 Hz, 1 H), 3.86 (s, 3 H), 3.75 (s, 3 H), 3.64 (s, 3 H), 3.53 (s, 3 H), 3.38 (td, *J* = 14.0 Hz, 4.4 Hz, 1 H), 2.55-2.30 (m, 2 H), 2.01-1.91 (m, 1 H); <sup>13</sup>C NMR (100 MHz, CDCl<sub>3</sub>) δ 177.2, 170.0, 168.9, 157.9, 155.0, 145.9, 136.3, 134.5, 130.4, 129.4, 127.0, 125.1, 69.4, 59.0, 55.0, 52.5, 52.2, 31.5, 26.6; HRMS-TOF-ES<sup>+</sup>: [M+H]<sup>+</sup> calcd for C<sub>30</sub>H<sub>30</sub>N<sub>2</sub>O<sub>7</sub>H: 531.2131, found: 531.2132.

#### 14. Synthesis of **3ga**

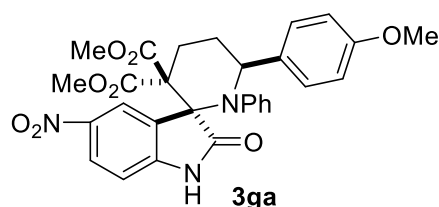

The reaction of iminoindole **1g** (0.22 mmol, 59 mg), cyclobutane **2a** (0.2 mmol, 56 mg) and 60 mg of 4Å M.S. and 10 mol % Sc(OTf)<sub>3</sub> in dry CH<sub>2</sub>Cl<sub>2</sub> (2.0 mL) was carried out at rt for 13 h, eluting with (hexanes:AcOEt = 4:1) to afford 80 mg (73%) of **3ga**, white solid, m.p. 262-264 °C. <sup>1</sup>H NMR (400 MHz, CDCl<sub>3</sub>) δ 8.25 (d, *J* = 2.4 Hz, 1 H), 7.98-7.92 (m, 1 H), 7.77-7.70 (m, 1 H), 7.25-7.12 (m, 2 H), 6.82-6.55 (m, 6 H), 6.48 (d, *J* = 8.4 Hz, 1 H), 5.11 (dd, *J* = 12.0 Hz, 3.6 Hz, 1 H), 3.92 (s, 3 H), 3.64 (s, 3 H), 3.58 (s, 3 H), 3.23 (td, *J* = 14.0 Hz, 4.4 Hz, 1 H), 2.78-2.66 (m, 1 H), 2.52-2.47 (m, 1 H), 2.01-1.94 (m, 1 H); <sup>13</sup>C NMR (100 MHz, CDCl<sub>3</sub>) δ 177.2, 170.2, 168.5, 158.0, 147.0, 129.4, 127.4, 125.8, 125.7, 123.4, 113.1, 108.6, 68.6, 59.0, 58.8, 55.0, 52.8, 52.6, 31.0, 26.5; HRMS-TOF-ES<sup>+</sup>: [M+H]<sup>+</sup> calcd for C<sub>29</sub>H<sub>27</sub>N<sub>3</sub>O<sub>8</sub>H: 546.1876, found: 546.1880.

#### 15. Synthesis of **3ha**

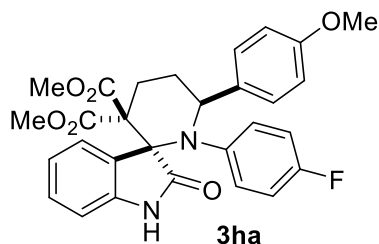

The reaction of iminooxindole **1h** (0.22 mmol, 53 mg), cyclobutane **2a** (0.2 mmol, 56 mg) and 60 mg of 4Å M.S. and 10 mol % Sc(OTf)<sub>3</sub> in dry CH<sub>2</sub>Cl<sub>2</sub> (2.0 mL) was carried out at rt for 4.5 h, eluting with (hexanes:AcOEt = 4:1) to afford 70 mg (68%) of **3ha**, white solid, m.p. 240-242 °C. <sup>1</sup>H NMR (400 MHz, CDCl<sub>3</sub>) δ 7.49 (s, 1 H), 7.41 (d, *J* = 7.6 Hz, 1 H), 7.25-7.10 (m, 2 H), 7.02-6.84 (m, 3 H), 6.63-6.24 (m, 5 H), 5.12 (dd, *J* = 12.0 Hz, 4.0 Hz, 1 H), 3.84 (s, 3 H), 3.66 (s, 3 H), 3.52 (s, 3 H), 3.33 (td, *J* = 14.0 Hz, 4.4 Hz, 1 H), 2.61-2.45 (m, 1 H), 2.42-2.33 (m, 1 H), 2.01-1.91 (m, 1 H); <sup>13</sup>C NMR (100 MHz, CDCl<sub>3</sub>) δ 177.1, 170.0, 168.9, 159.6 (d, *J* = 242 Hz), 157.9, 141.7, 140.9, 136.0, 129.3, 128.9, 128.8, 127.3, 121.5, 113.6 (d, *J* = 21.7 Hz), 113.1, 109.0, 68.9, 59.1, 58.8, 55.0, 52.6, 52.2, 31.3, 26.5; <sup>19</sup>F NMR (300 MHz, CDCl<sub>3</sub>) δ -116.8; HRMS-TOF-ES<sup>+</sup>: [M+H]<sup>+</sup> calcd for C<sub>29</sub>H<sub>27</sub>FN<sub>2</sub>O<sub>6</sub>H: 519.1931, found: 519.1931.

## 16. Synthesis of 3ia

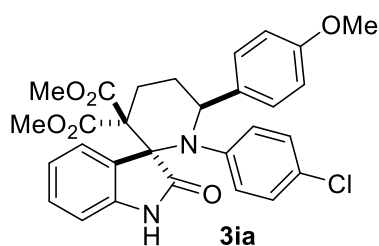

The reaction of iminooxindole **1i** (0.22 mmol, 57 mg), cyclobutane **2a** (0.2 mmol, 56 mg) and 60 mg of 4Å M.S. and 10 mol % Sc(OTf)<sub>3</sub> in dry CH<sub>2</sub>Cl<sub>2</sub> (2.0 mL) was carried out at rt for 3.5 h, eluting with (hexanes:AcOEt = 4:1) to afford 78 mg (73%) of **3ia**, white solid, 244-246 °C. <sup>1</sup>H NMR (400 MHz, CDCl<sub>3</sub>) δ 7.42 (s, 1 H), 7.40 (d, *J* = 3.6 Hz, 1 H), 7.25-7.10 (m, 2 H), 7.04-6.75 (m, 3 H), 6.70-6.56 (m, 4 H), 6.42 (d, *J* = 7.2 Hz, 1 H), 5.14 (dd, *J* = 12.0 Hz, 4.0 Hz, 1 H), 3.84 (s, 3 H), 3.67 (s, 3 H), 3.52

(s, 3 H), 3.32 (td,  $J = 14.0$  Hz, 4.4 Hz, 1 H), 2.60-2.45 (m, 1 H), 2.41-2.32 (m, 1 H), 2.01-1.91 (m, 1 H);  $^{13}\text{C}$  NMR (100 MHz,  $\text{CDCl}_3$ )  $\delta$  176.8, 170.0, 168.9, 158.0, 144.6, 140.9, 135.8, 130.4, 129.2, 129.1, 128.7, 127.3, 127.1, 121.6, 113.2, 109.1, 68.9, 58.9, 58.8, 55.0, 52.6, 52.2, 31.3, 26.5; HRMS-TOF-ES<sup>+</sup>:  $[\text{M}+\text{H}]^+$  calcd for  $\text{C}_{29}\text{H}_{27}\text{ClN}_2\text{O}_6\text{H}$ : 535.1636, found: 535.1636.

## 17. Synthesis of 3ja

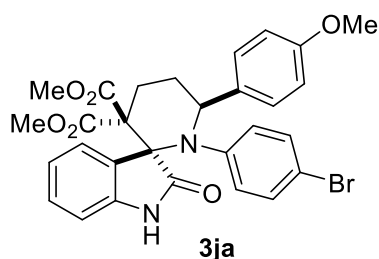

The reaction of iminoindole **1j** (0.22 mmol, 66 mg), cyclobutane **2a** (0.2 mmol, 56 mg) and 60 mg of 4Å M.S. and 10 mol %  $\text{Sc}(\text{OTf})_3$  in dry  $\text{CH}_2\text{Cl}_2$  (2.0 mL) was carried out at rt for 8 h, eluting with (hexanes:AcOEt = 4:1) to afford 80 mg (69%) of **3ja**, white solid, 254-256 °C.  $^1\text{H}$  NMR (400 MHz,  $\text{CDCl}_3$ )  $\delta$  7.54-7.38 (m, 2 H), 7.25-7.10 (m, 2 H), 7.04-6.70 (m, 5 H), 6.63-6.57 (m, 2 H), 6.42 (d,  $J = 8.0$  Hz, 1 H), 5.14 (dd,  $J = 11.6$  Hz, 3.6 Hz, 1 H), 3.84 (s, 3 H), 3.67 (s, 3 H), 3.52 (s, 3 H), 3.32 (td,  $J = 14.0$  Hz, 4.4 Hz, 1 H), 2.59-2.32 (m, 2 H), 2.01-1.91 (m, 1 H);  $^{13}\text{C}$  NMR (100 MHz,  $\text{CDCl}_3$ )  $\delta$  176.8, 170.0, 168.9, 158.0, 145.1, 140.9, 135.8, 130.0, 129.2, 129.1, 128.7, 127.3, 121.6, 118.6, 113.2, 109.1, 68.8, 58.8, 58.7, 55.0, 52.6, 52.2, 31.4, 26.5; HRMS-TOF-ES<sup>+</sup>:  $[\text{M}+\text{H}]^+$  calcd for  $\text{C}_{29}\text{H}_{27}^{79}\text{BrN}_2\text{O}_6\text{H}$ : 579.1131, found: 579.1128.

## 18. Synthesis of 3ka

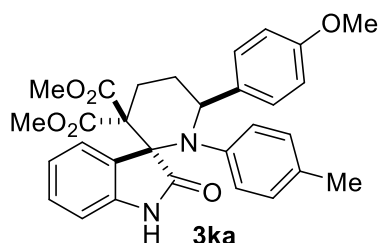

The reaction of iminoindole **1k** (0.22 mmol, 52 mg), cyclobutane **2a** (0.2 mmol, 56

mg) and 60 mg of 4Å M.S. and 10 mol % Sc(OTf)<sub>3</sub> in dry CH<sub>2</sub>Cl<sub>2</sub> (2.0 mL) was carried out at rt for 8 h, eluting with (hexanes:AcOEt = 4:1) to afford 72 mg (70%) of **3ka**, white solid, m.p. 255-257 °C. <sup>1</sup>H NMR (400 MHz, CDCl<sub>3</sub>) δ 7.44 (d, *J* = 7.6 Hz, 1 H), 7.25-7.10 (m, 3 H), 7.02-6.70 (m, 3 H), 6.63-6.43 (m, 4 H), 6.38 (d, *J* = 7.6 Hz, 1 H), 5.17 (dd, *J* = 12.0 Hz, 4.0 Hz, 1 H), 3.84 (s, 3 H), 3.65 (s, 3 H), 3.52 (s, 3 H), 3.34 (td, *J* = 14.0 Hz, 4.4 Hz, 1 H), 2.60-2.43 (m, 1 H), 2.40-2.31 (m, 1 H), 2.01-1.90 (m, 4 H); <sup>13</sup>C NMR (100 MHz, CDCl<sub>3</sub>) δ 177.2, 170.0, 169.0, 157.7, 143.1, 140.9, 136.6, 134.2, 129.2, 129.1, 128.7, 127.6, 127.5, 121.3, 113.0, 108.8, 69.0, 59.0, 58.9, 55.0, 52.5, 52.1, 31.6, 26.5, 20.7; HRMS-TOF-ES<sup>+</sup>: [M+H]<sup>+</sup> calcd for C<sub>30</sub>H<sub>30</sub>N<sub>2</sub>O<sub>6</sub>H: 515.2182, found: 515.2183.

## 19. Synthesis of 3la

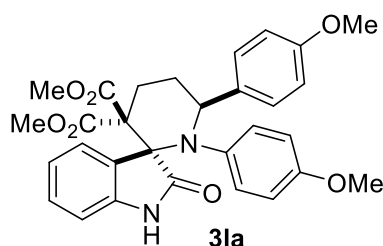

The reaction of iminoindole **11** (0.22 mmol, 55.4 mg), cyclobutane **2a** (0.2 mmol, 56 mg) and 60 mg of 4Å M.S. and 10 mol % Sc(OTf)<sub>3</sub> in dry CH<sub>2</sub>Cl<sub>2</sub> (2.0 mL) was carried out at rt for 3.5 h, eluting with (hexanes:AcOEt = 4:1) to afford 69 mg (65%) of **3la**, white solid, m.p. 214-216 °C. <sup>1</sup>H NMR (400 MHz, CDCl<sub>3</sub>) δ 7.43 (d, *J* = 7.6 Hz, 1 H), 7.38 (s, 1 H), 7.25-7.10 (m, 2 H), 7.00-6.57 (m, 5 H), 6.39 (d, *J* = 7.6 Hz, 1 H), 6.30-6.08 (m, 2 H), 5.14 (dd, *J* = 12.0 Hz, 4.0 Hz, 1 H), 3.83 (s, 3 H), 3.65 (s, 3 H), 3.51 (s, 3 H), 3.49 (s, 3 H), 3.33 (td, *J* = 14.0 Hz, 4.4 Hz, 1 H), 2.57-2.42 (m, 1 H), 2.40-2.31 (m, 1 H), 2.00-1.90 (m, 1 H); <sup>13</sup>C NMR (100 MHz, CDCl<sub>3</sub>) δ 177.4, 170.0, 169.0, 157.7, 126.2, 140.9, 138.6, 136.5, 129.2, 129.1, 128.7, 127.3, 121.4, 113.0, 112.0, 108.9, 69.1, 59.1, 59.0, 54.9, 54.8, 52.5, 52.1, 31.5, 26.5; HRMS-TOF-ES<sup>+</sup>: [M+H]<sup>+</sup> calcd for C<sub>30</sub>H<sub>30</sub>N<sub>2</sub>O<sub>7</sub>H: 531.2131, found: 531.2126.

## 20. Synthesis of 3ma

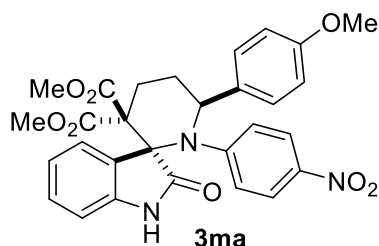

The reaction of iminooxindole **1m** (0.22 mmol, 59 mg), cyclobutane **2a** (0.2 mmol, 56 mg) and 60 mg of 4Å M.S. and 10 mol % Sc(OTf)<sub>3</sub> in dry CH<sub>2</sub>Cl<sub>2</sub> (2.0 mL) was carried out at rt for 14 h, eluting with (hexanes:AcOEt = 4:1) to afford 47 mg (43%) of **3ma**, white solid, m.p. 260-262 °C. <sup>1</sup>H NMR (400 MHz, CDCl<sub>3</sub>) δ 7.63-7.56 (m, 2 H), 7.46 (d, *J* = 8.0 Hz, 1 H), 7.33 (s, 1 H), 7.17-6.88 (m, 5 H), 6.62-6.56 (m, 2 H), 6.40 (d, *J* = 8.0 Hz, 1 H), 5.21 (dd, *J* = 12.0 Hz, 3.6 Hz, 1 H), 3.86 (s, 3 H), 3.65 (s, 3 H), 3.54 (s, 3 H), 3.34 (td, *J* = 14.0 Hz, 4.4 Hz, 1 H), 2.60-2.50 (m, 1 H), 2.44-2.36 (m, 1 H), 2.03-1.96 (m, 1 H); <sup>13</sup>C NMR (100 MHz, CDCl<sub>3</sub>) δ 176.0, 169.8, 168.8, 158.3, 153.1, 144.6, 140.8, 138.6, 135.0, 129.6, 129.3, 128.1, 127.4, 125.9, 124.0, 122.3, 122.0, 68.9, 58.8, 58.7, 55.0, 52.7, 52.3, 31.2, 26.5; HRMS-TOF-ES<sup>+</sup>: [M+H]<sup>+</sup> calcd for C<sub>29</sub>H<sub>27</sub>N<sub>3</sub>O<sub>8</sub>H: 546.1876, found: 546.1880.

## 21. Synthesis of 3oa

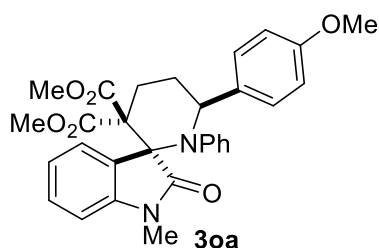

The reaction of iminooxindole **1o** (0.22 mmol, 52 mg), cyclobutane **2a** (0.2 mmol, 56 mg) and 60 mg of 4Å M.S. and 10 mol % Sc(OTf)<sub>3</sub> in dry CH<sub>2</sub>Cl<sub>2</sub> (2.0 mL) was carried out at rt for 14 h, eluting with (hexanes:AcOEt = 4:1) to afford 36 mg (35%) of **3oa**, white solid, m.p. 183-185 °C. <sup>1</sup>H NMR (400 MHz, CDCl<sub>3</sub>) δ 7.38 (d, *J* = 8.0 Hz, 1 H), 7.27-7.14 (m, 2 H), 7.07-6.98 (m, 1 H), 6.92-6.54 (m, 8 H), 6.31 (d, *J* = 8.0



Hz, 1 H), 5.18 (dd,  $J = 12.0$  Hz, 3.6 Hz, 1 H), 3.84 (s, 3 H), 3.64 (s, 3 H), 3.51 (s, 3 H), 3.37 (td,  $J = 14.0$  Hz, 4.4 Hz, 1 H), 2.94 (s, 3 H), 2.69-2.53 (m, 1 H), 2.44-2.34 (m, 1 H), 2.03-1.91 (m, 1 H);  $^{13}\text{C}$  NMR (100 MHz,  $\text{CDCl}_3$ )  $\delta$  175.4, 170.0, 169.2, 157.8, 145.8, 144.0, 136.4, 129.3, 128.8, 126.7, 126.6, 125.0, 121.4, 113.0, 107.2, 68.6, 58.8, 58.6, 54.9, 52.4, 52.0, 31.4, 26.7, 25.4; HRMS-TOF-ES<sup>+</sup>:  $[\text{M}+\text{Na}]^+$  calcd for  $\text{C}_{30}\text{H}_{30}\text{N}_2\text{O}_6\text{Na}$ : 537.2002, found: 537.1996.

### The [4+2] cycloaddition reaction of enantioenriched cyclobutane **2a** and **1a**.

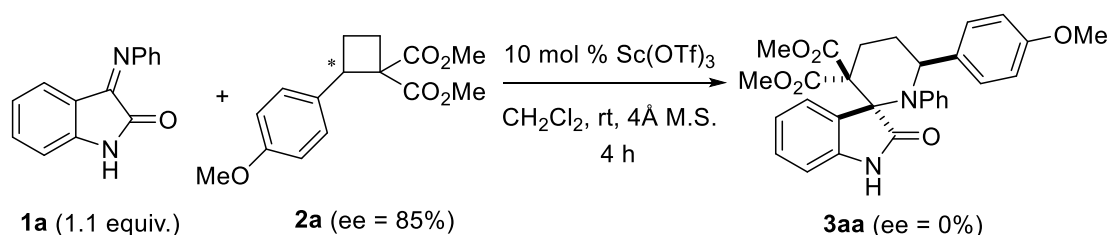

**3aa**, determined by HPLC, chiralcel ADH, *i*-PrOH/hexane = 20/80, 1.0 mL/min, 240 nm;  $t_r = 9.34$  min,  $t'_r = 17.8$  min).

### The transformations of cycloadduct **3aa**.

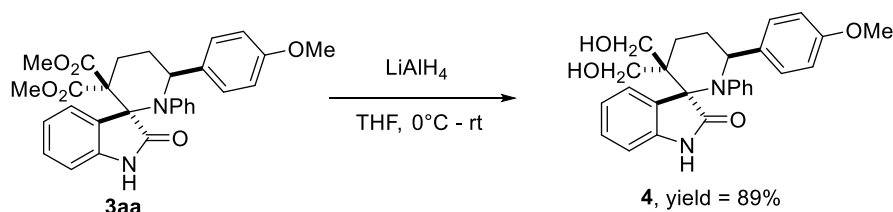

Under  $\text{N}_2$ , the cycloadduct **3aa** (0.2 mmol, 100.0 mg) was dissolved in THF, and cooled at 0°C,  $\text{LiAlH}_4$  (2.35 mmol, 39 mg) was added into the reaction mixture. The reaction mixture was stirred at room temperature. When the cycloadduct **3aa** disappeared (monitored by TLC), the reaction mixture was quenched with  $\text{H}_2\text{O}$  (1.2 mL), 15% NaOH (1.2 mL),  $\text{H}_2\text{O}$  (3.6 mL), and then passed over a plug of celite with 30 mL of MeOH. The filtrate was removed under reduced pressure and the residue was purified by silica gel column chromatography (petroleum ether/ethyl acetate, v/v= 2:1) to give the desired product in 89% yield (79 mg), white solid. m.p. 230-232 °C.  $^1\text{H}$  NMR (400MHz,  $\text{DMSO}-d_6$ )  $\delta$  10.11 (s, 1 H), 7.41 (d,  $J = 7.6$  Hz, 1 H), 7.15 (d,  $J = 7.6$  Hz, 2 H), 7.05-6.85 (m, 3 H), 6.78-6.68 (m, 3 H), 6.64-6.55 (m, 3 H), 6.35 (d,  $J = 7.6$  Hz, 1 H), 5.30 (dd,  $J = 11.6$  Hz, 3.6 Hz, 1 H), 4.78 (dd,  $J = 10.4$  Hz, 6.8 Hz, 1 H), 4.45-4.38 (m, 2 H), 3.88-3.81 (m, 1 H), 3.58 (s, 3 H), 3.20-3.01 (m, 2 H), 2.64-2.54 (m, 2 H), 2.09-1.87 (m, 2 H), 1.79-1.70 (m, 1 H),  $^{13}\text{C}$  NMR (100MHz,  $\text{DMSO}-d_6$ )  $\delta$  178.9, 157.4, 147.4, 142.1, 137.0, 128.8, 128.2, 128.0, 127.0, 124.8,

119.8, 113.0, 108.5, 99.6, 71.3, 65.8, 61.8, 59.6, 54.7, 43.6, 31.9, 21.0;  
HRMS-TOF-ES<sup>+</sup>: [M+H]<sup>+</sup> calcd for C<sub>27</sub>H<sub>28</sub>N<sub>2</sub>O<sub>4</sub>H: 445.2127, found: 445.2129.

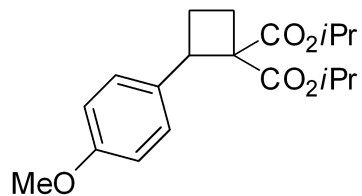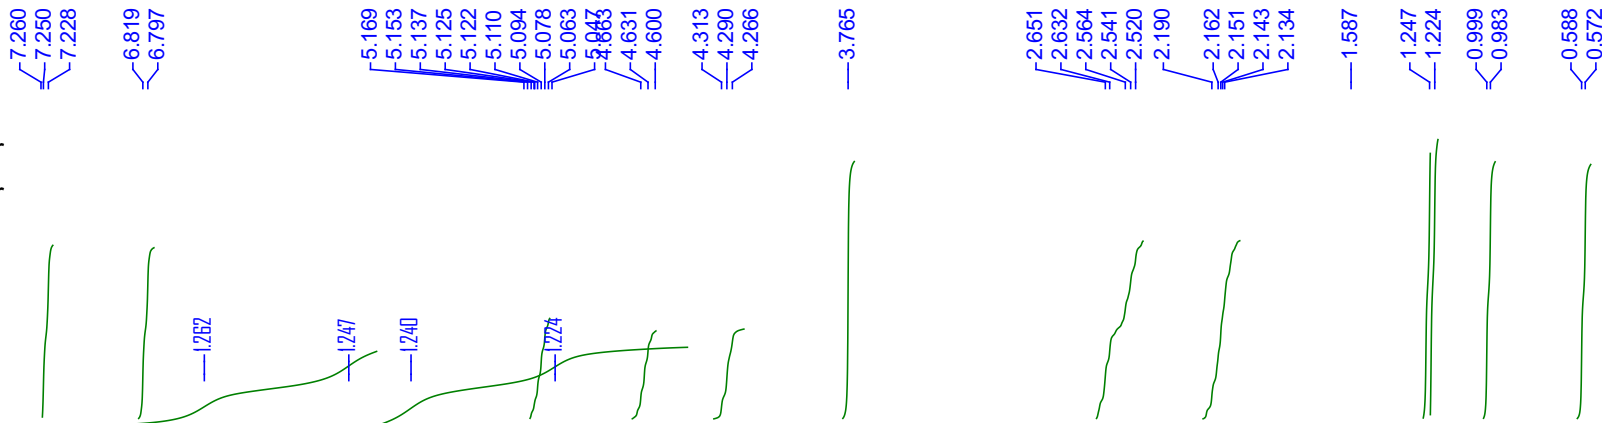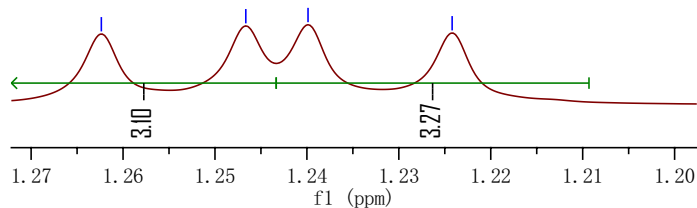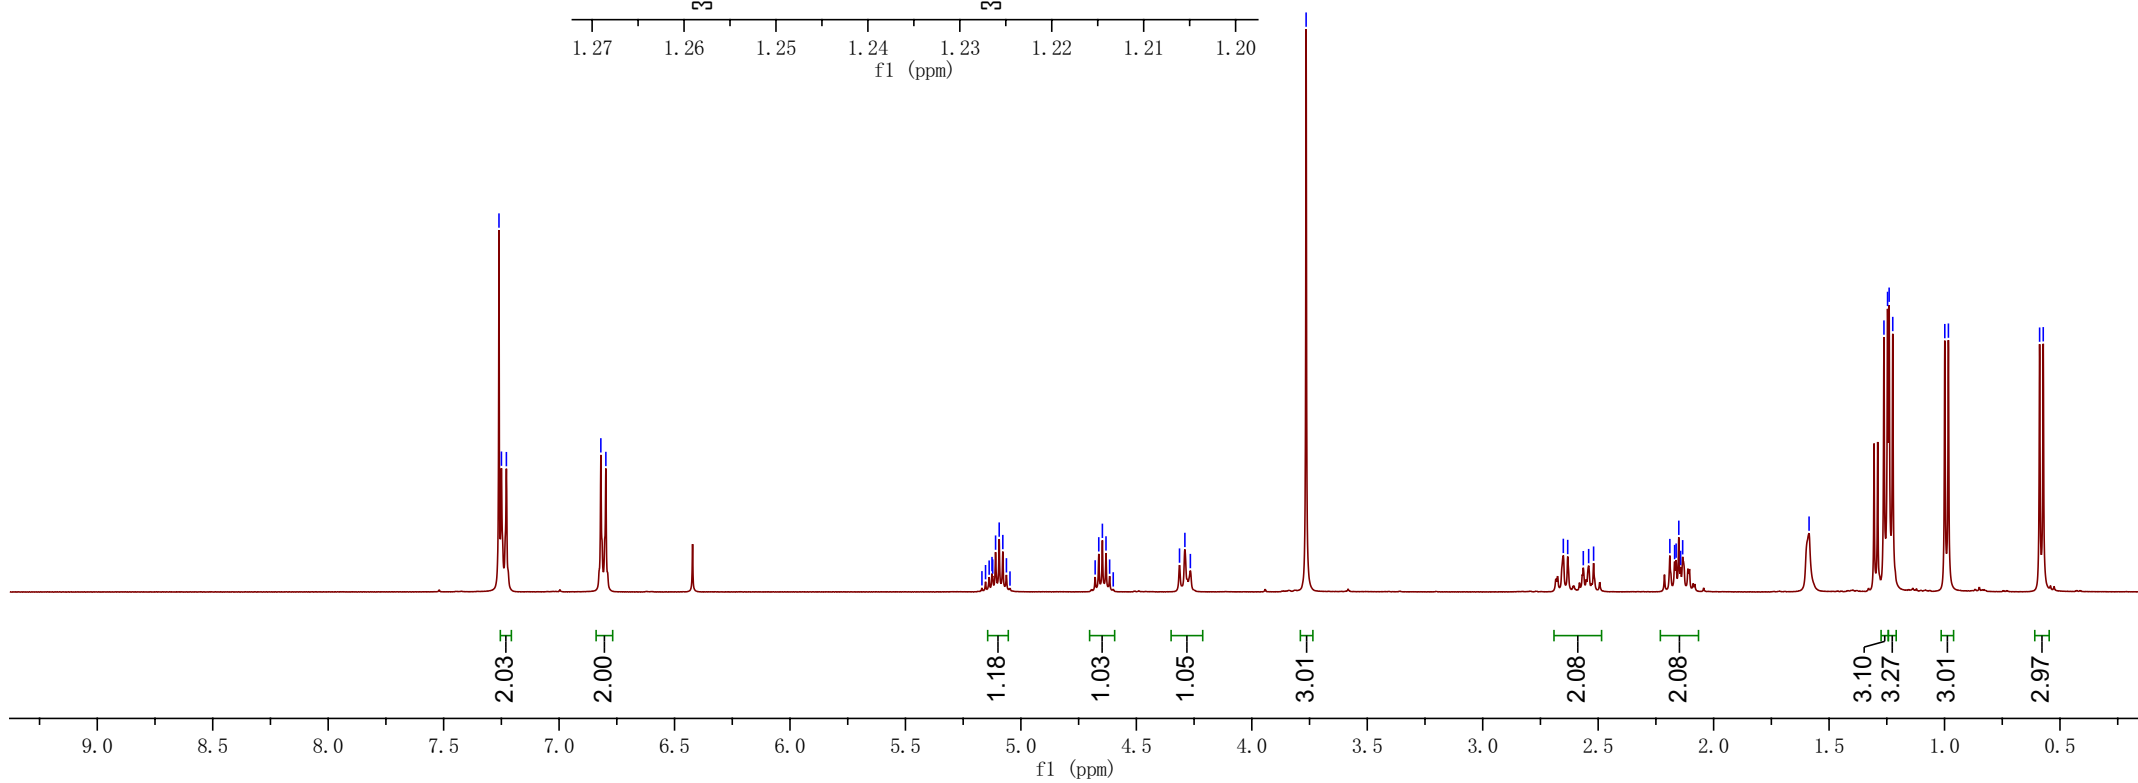

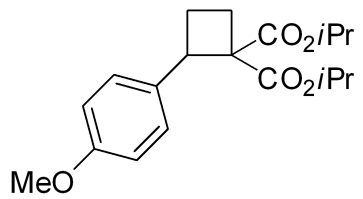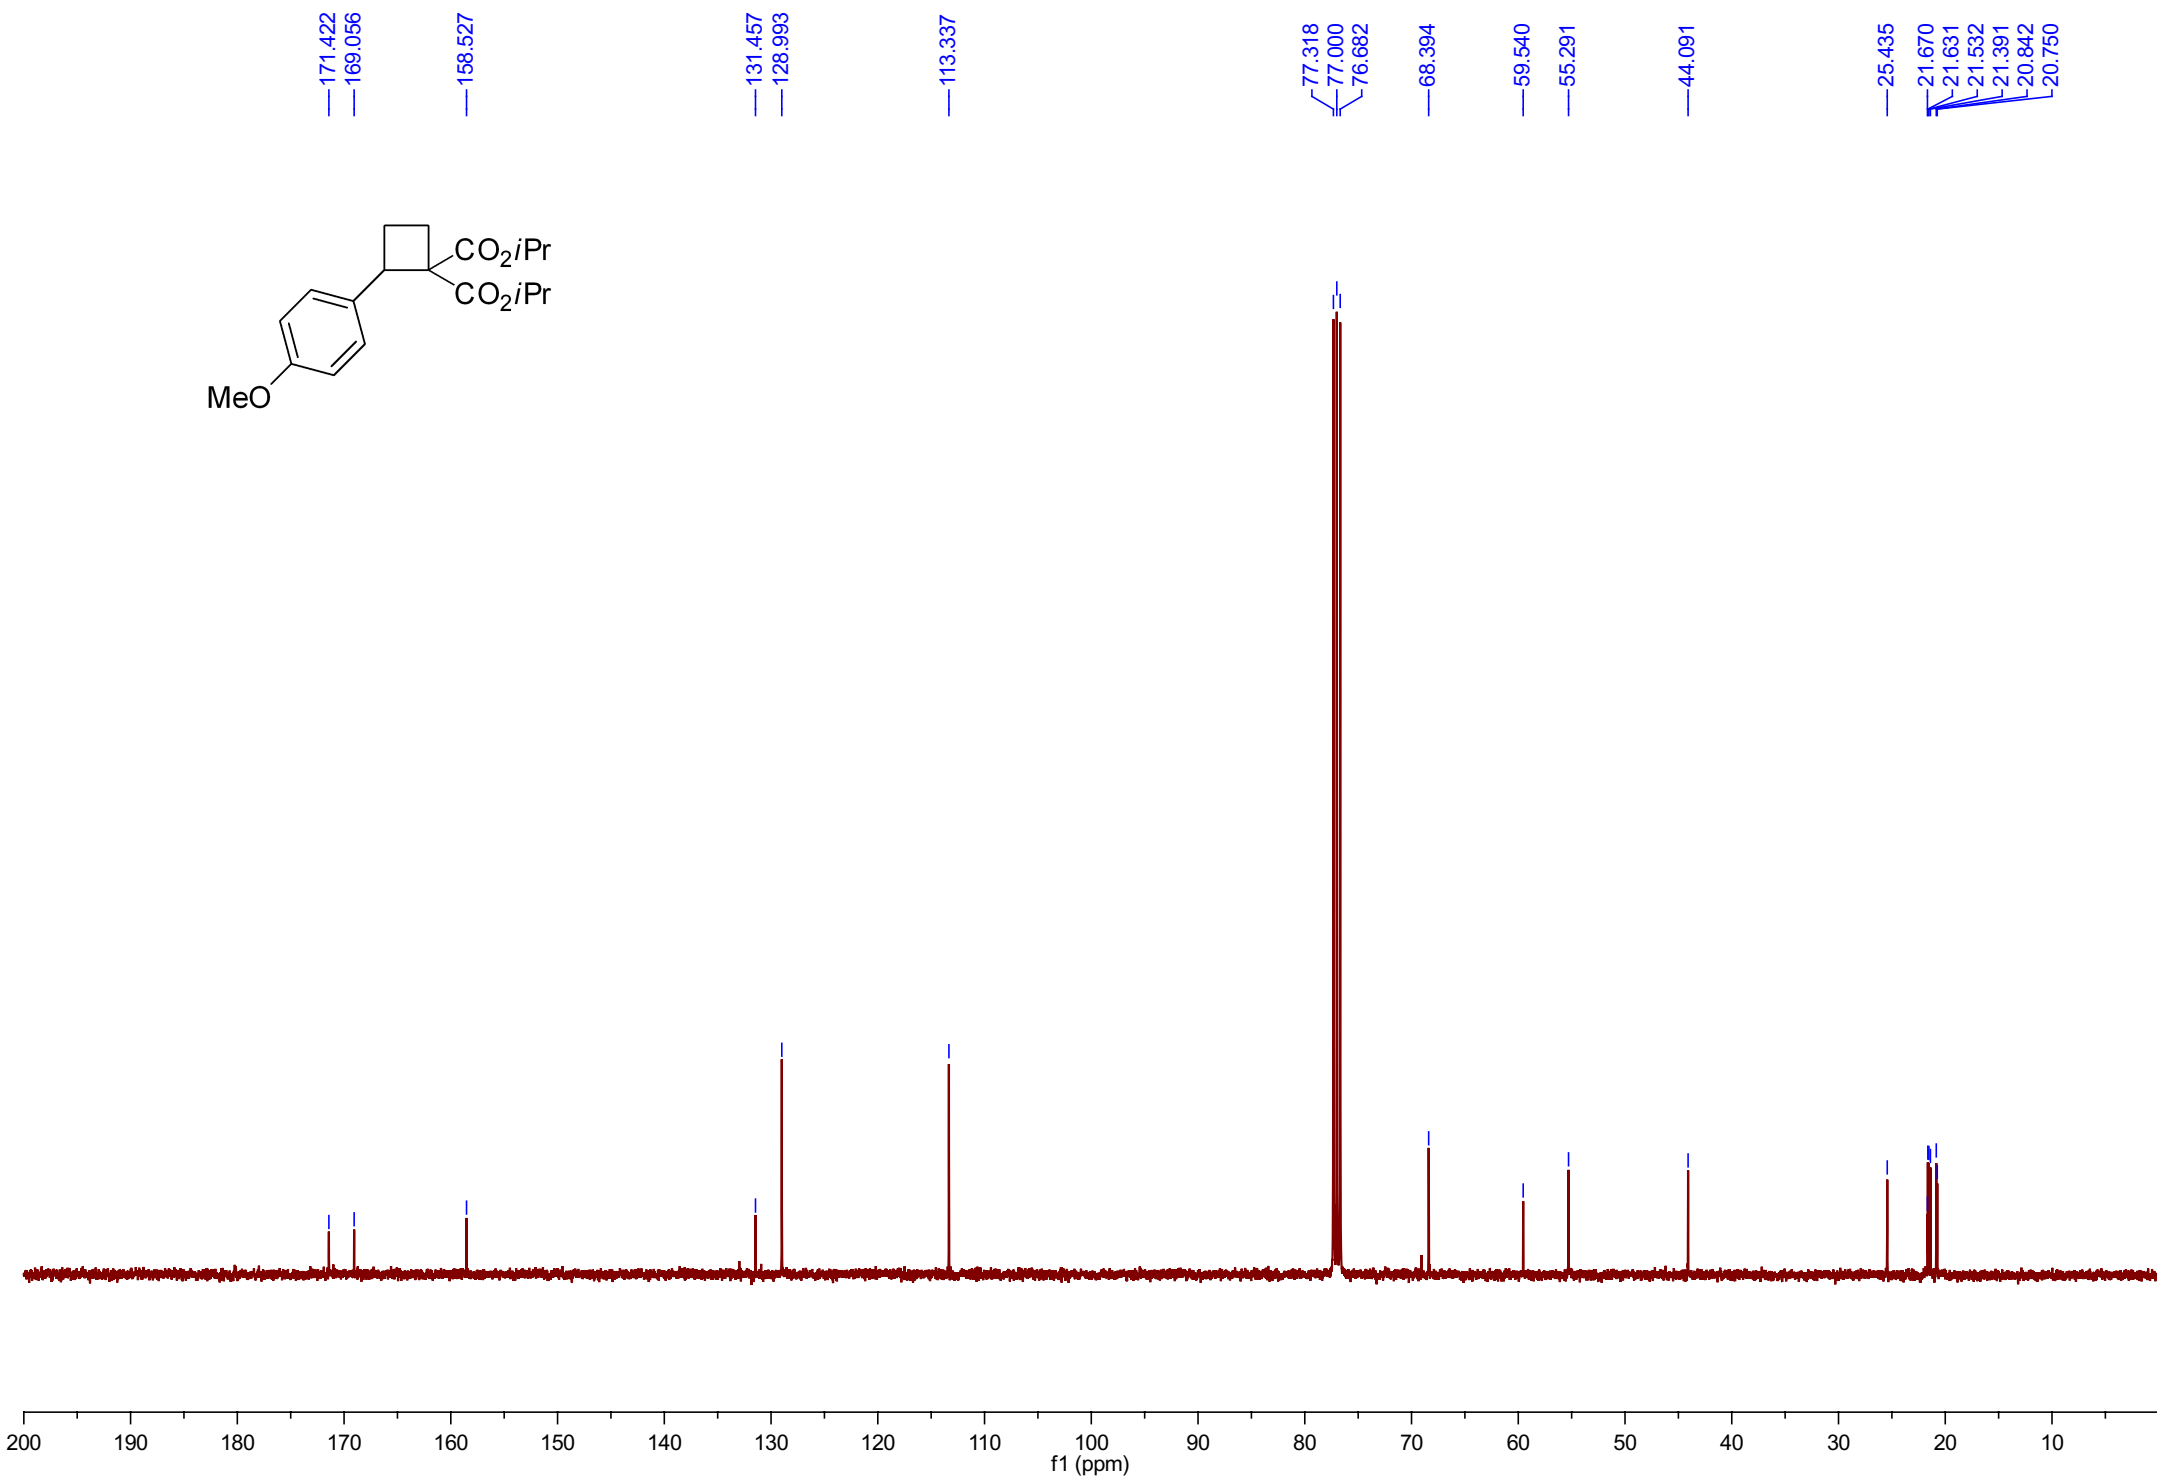

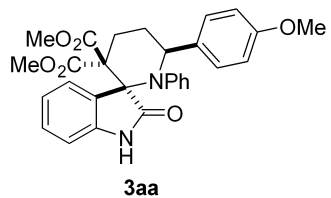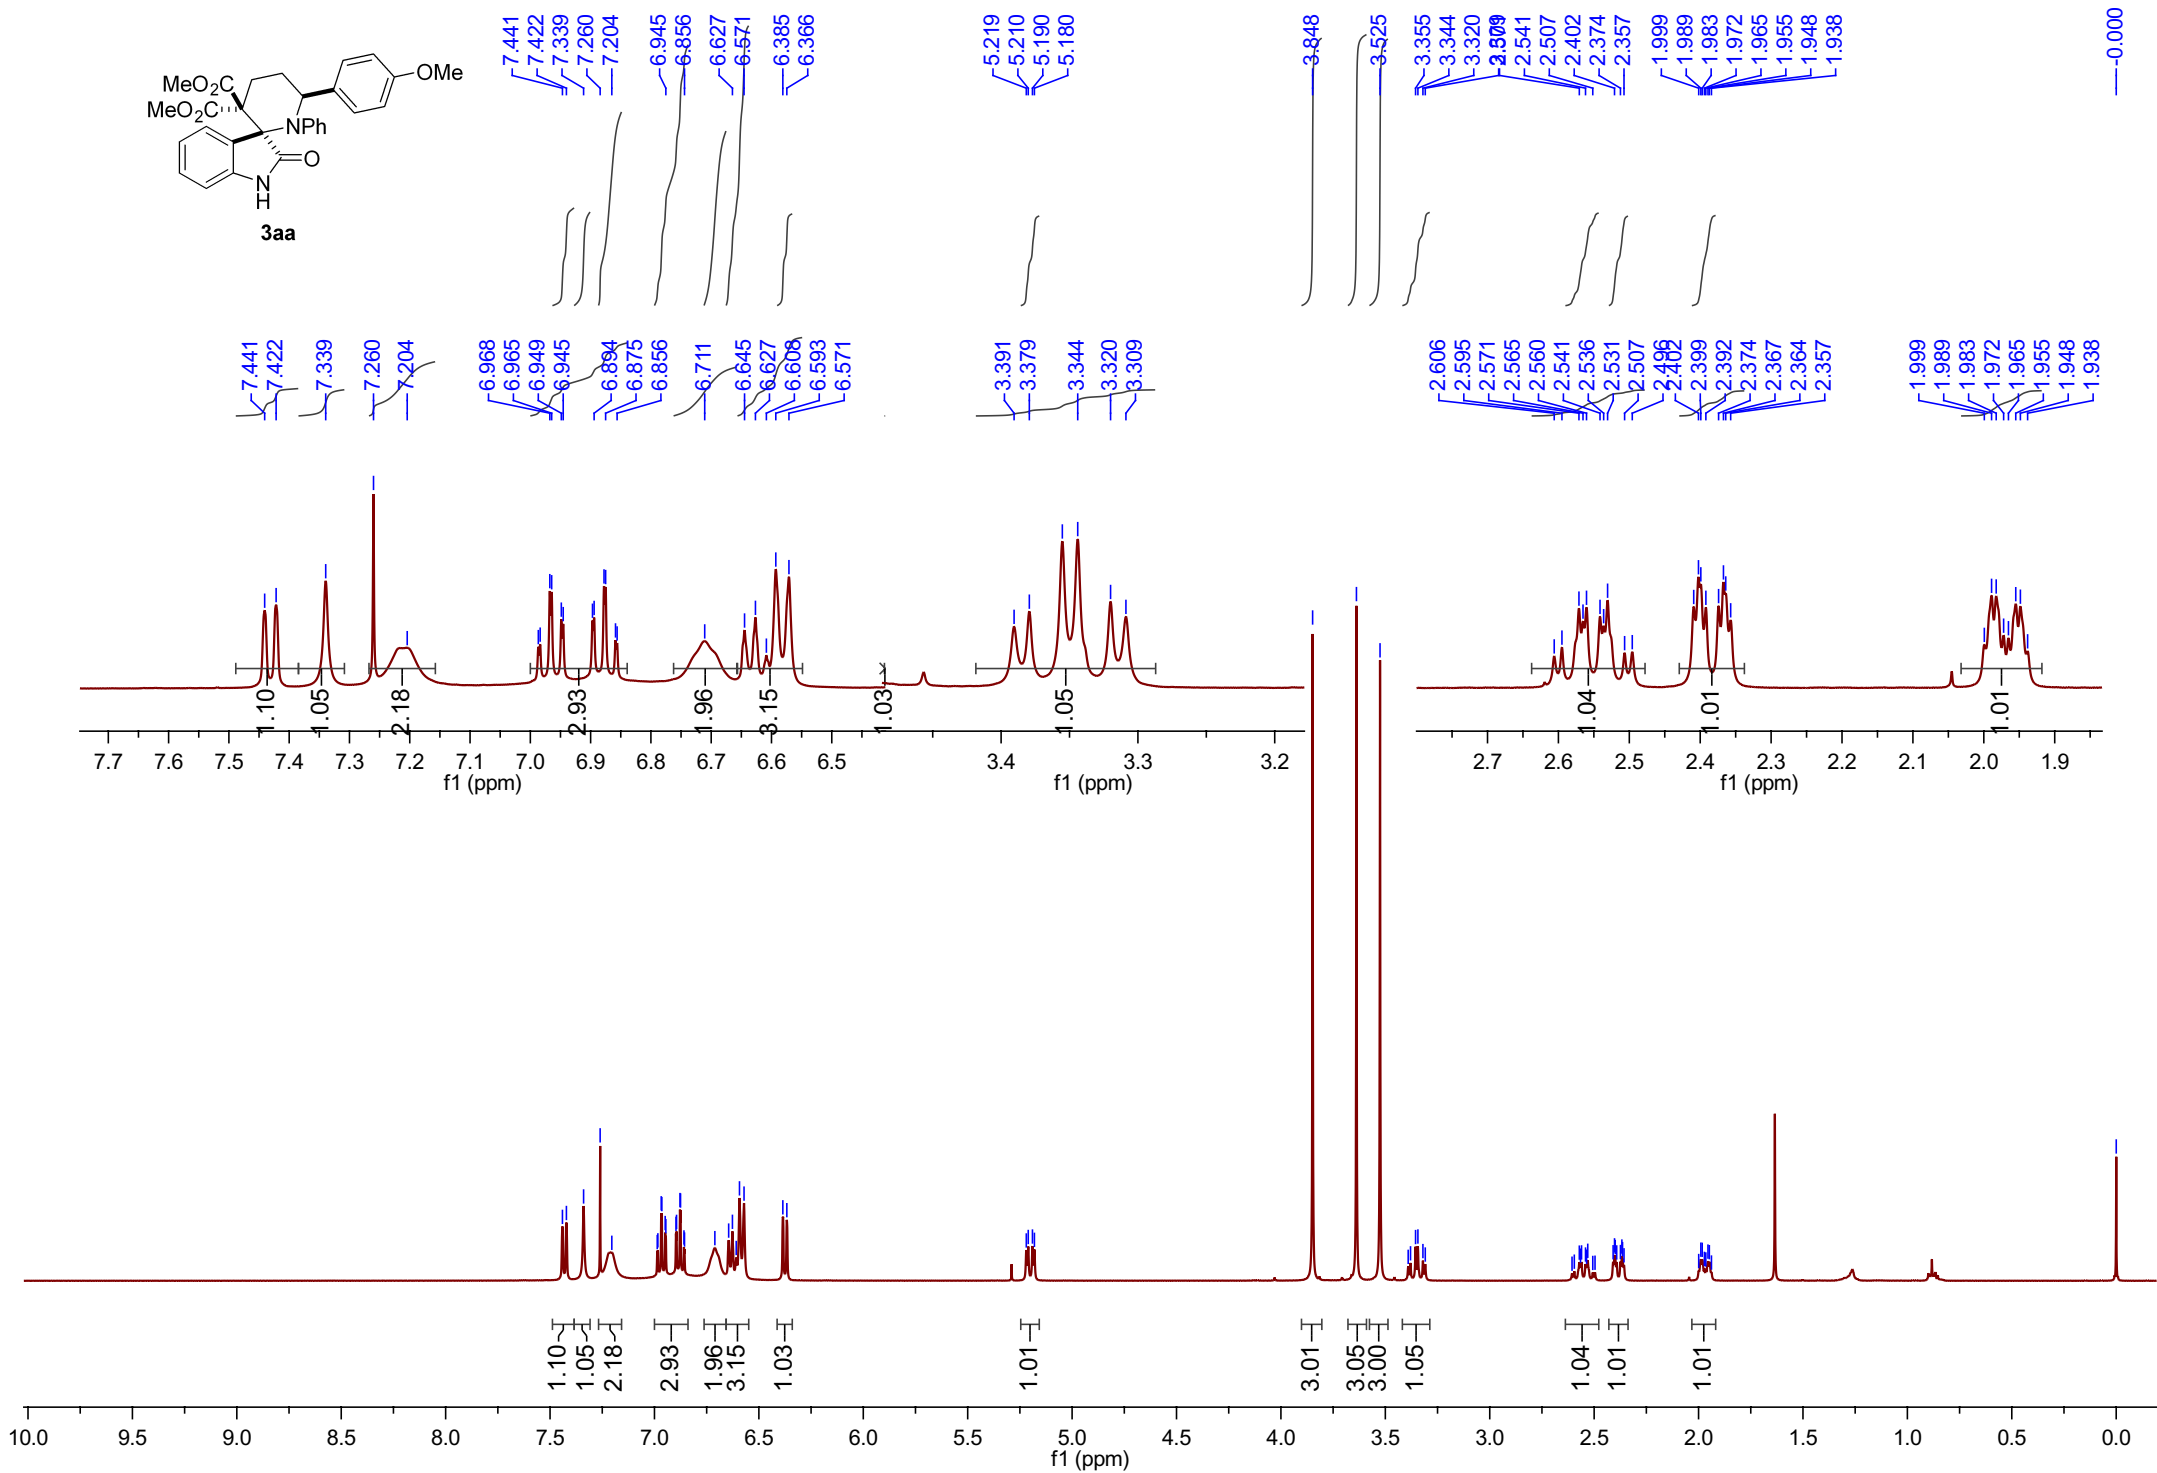

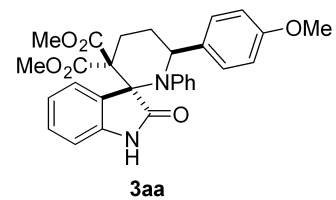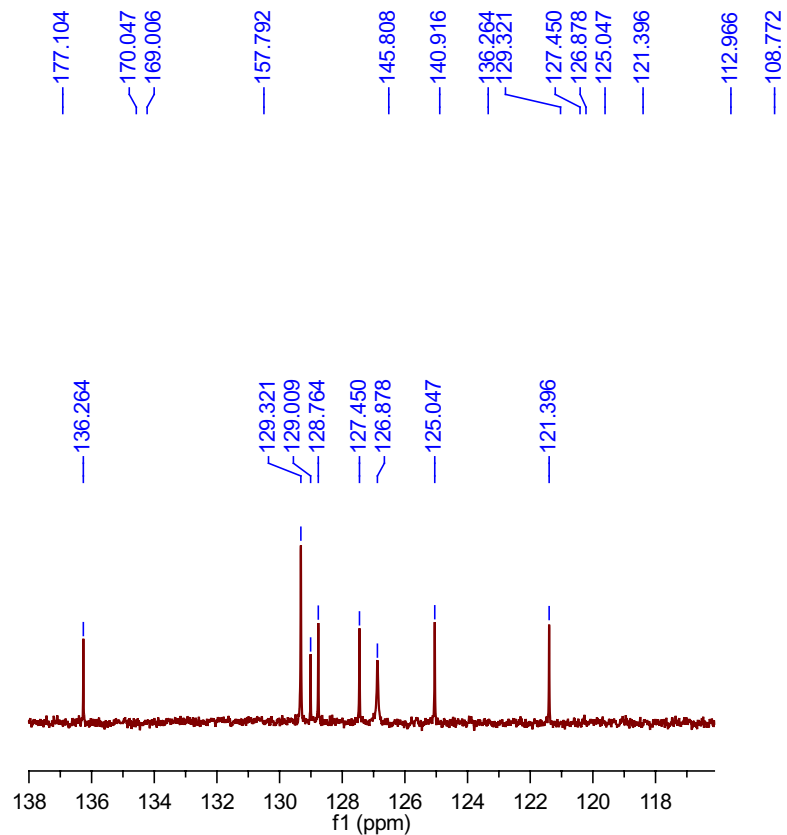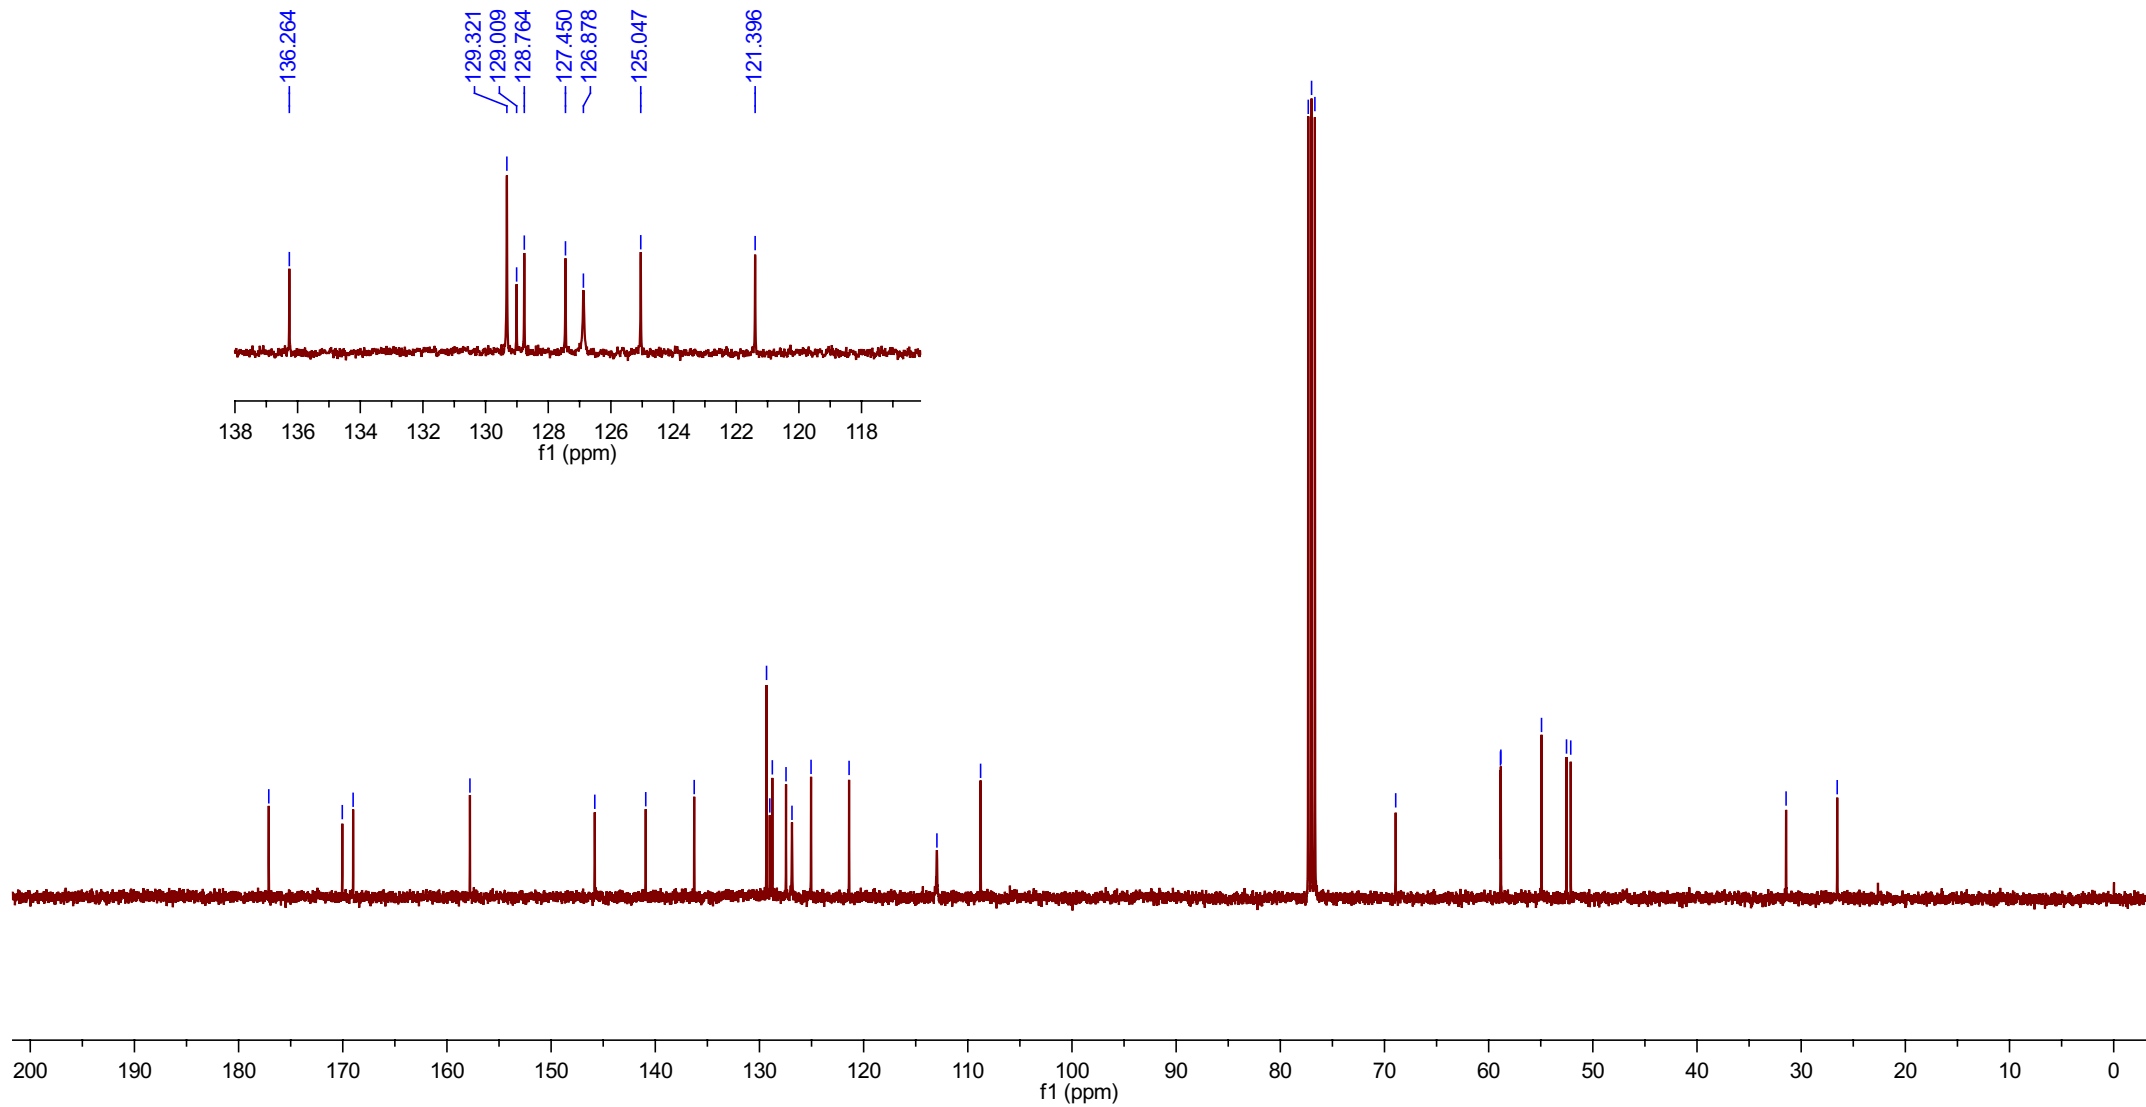

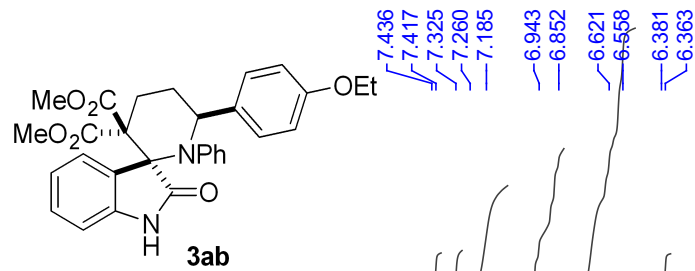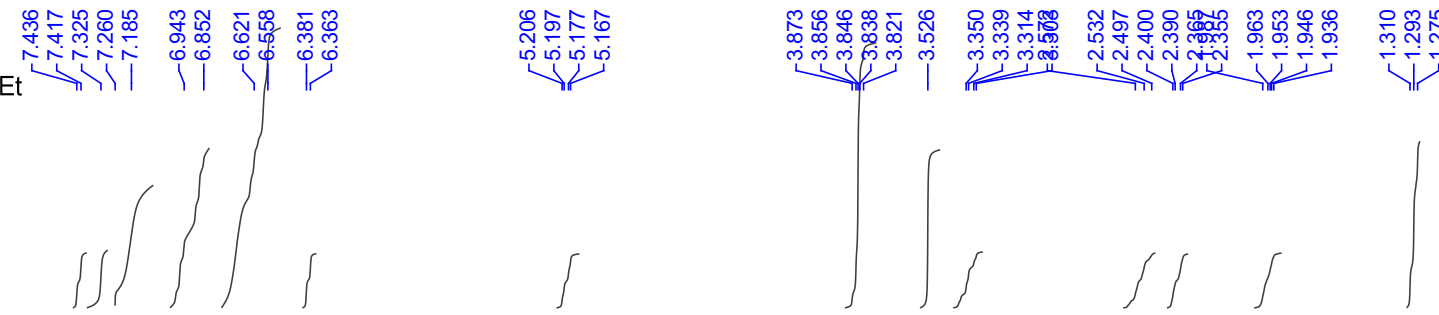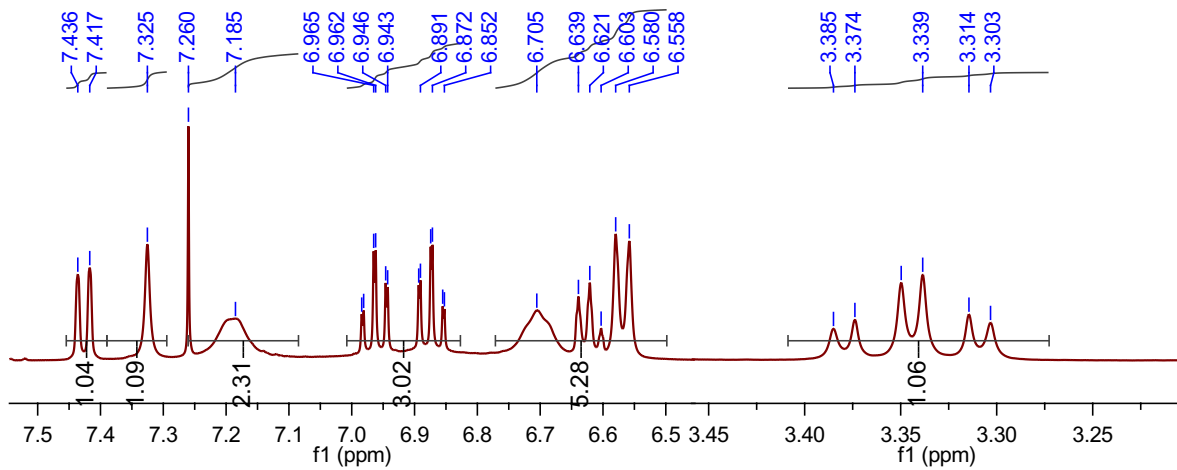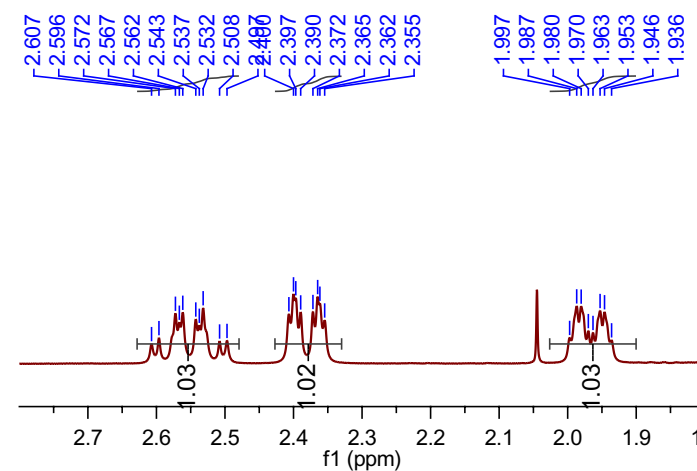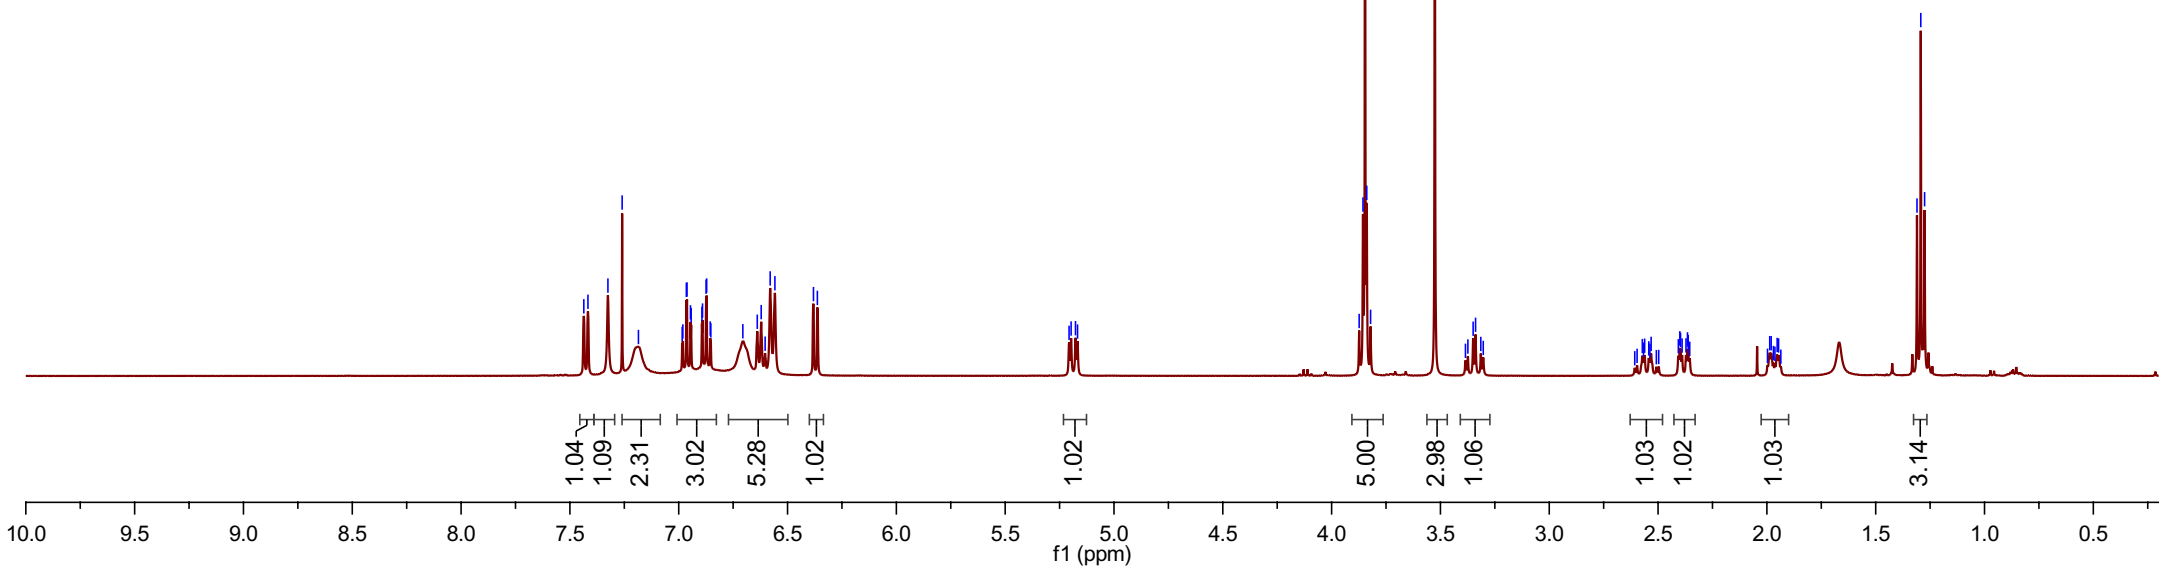

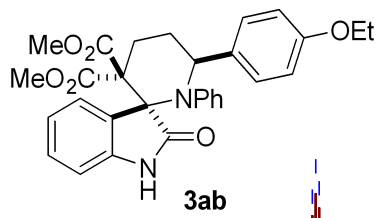

177.114  
170.060  
169.012  
157.189  
145.809  
140.904  
136.106  
129.311  
127.447  
126.861  
125.030  
121.391  
113.516  
108.764  
77.317  
77.000  
76.682  
68.923  
63.016  
58.861  
52.527  
52.123  
31.420  
26.554  
14.780

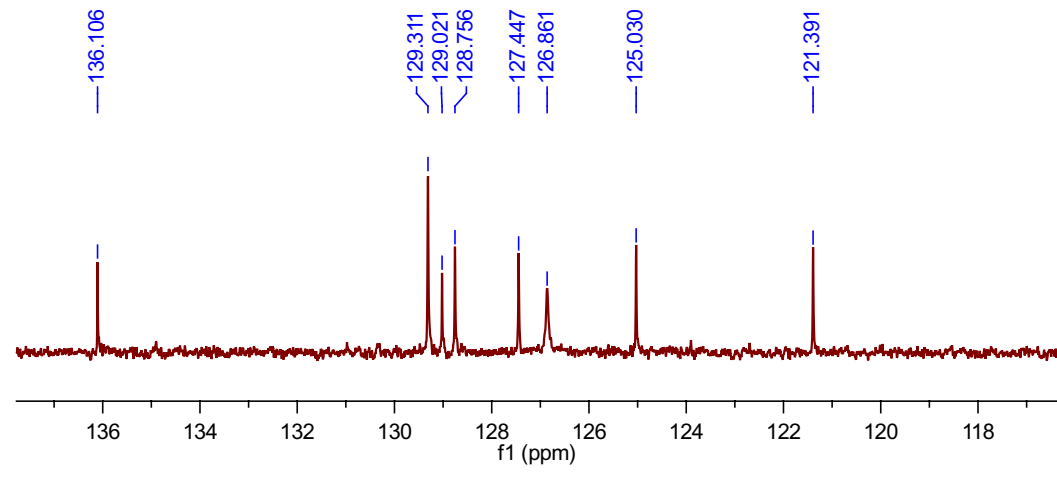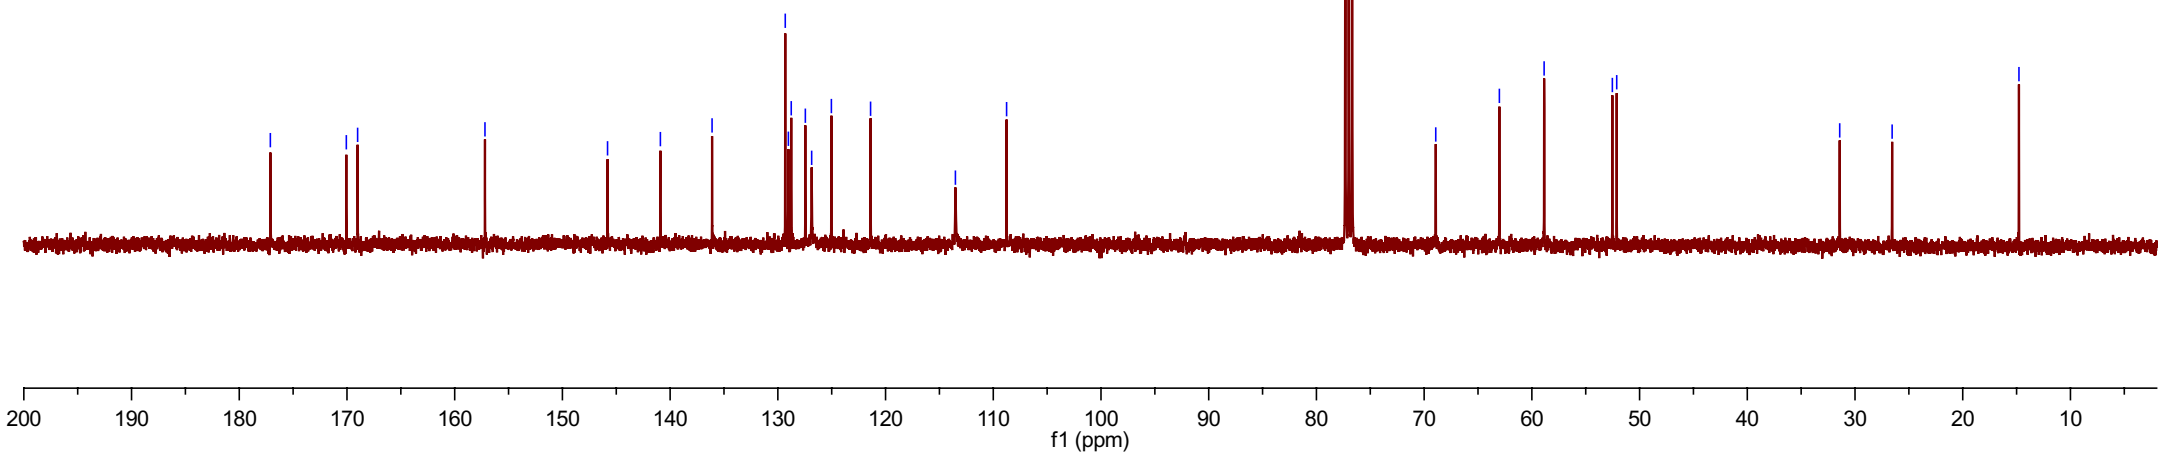



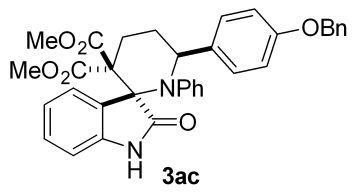

7.441, 7.422, 7.334, 7.323, 7.308, 7.305, 7.299, 7.289, 7.285, 7.277, 7.274, 7.257, 7.207, 6.946, 6.856, 6.620, 6.382, 6.362, 5.222, 5.212, 5.192, 5.183, 4.872, 3.846, 3.529, 3.355, 3.344, 3.320, 2.998, 2.544, 2.509, 2.403, 2.375, 2.358, 2.003, 1.993, 1.986, 1.976, 1.969, 1.959, 1.952, 1.942

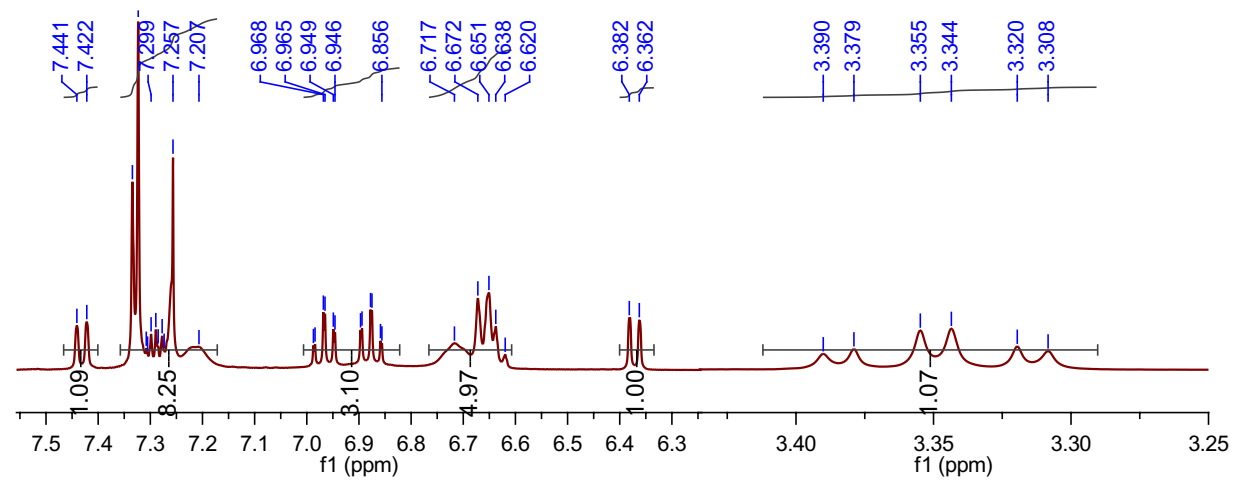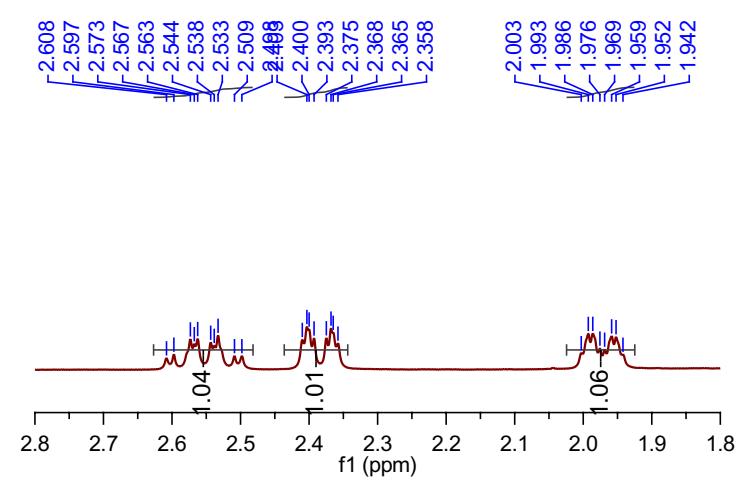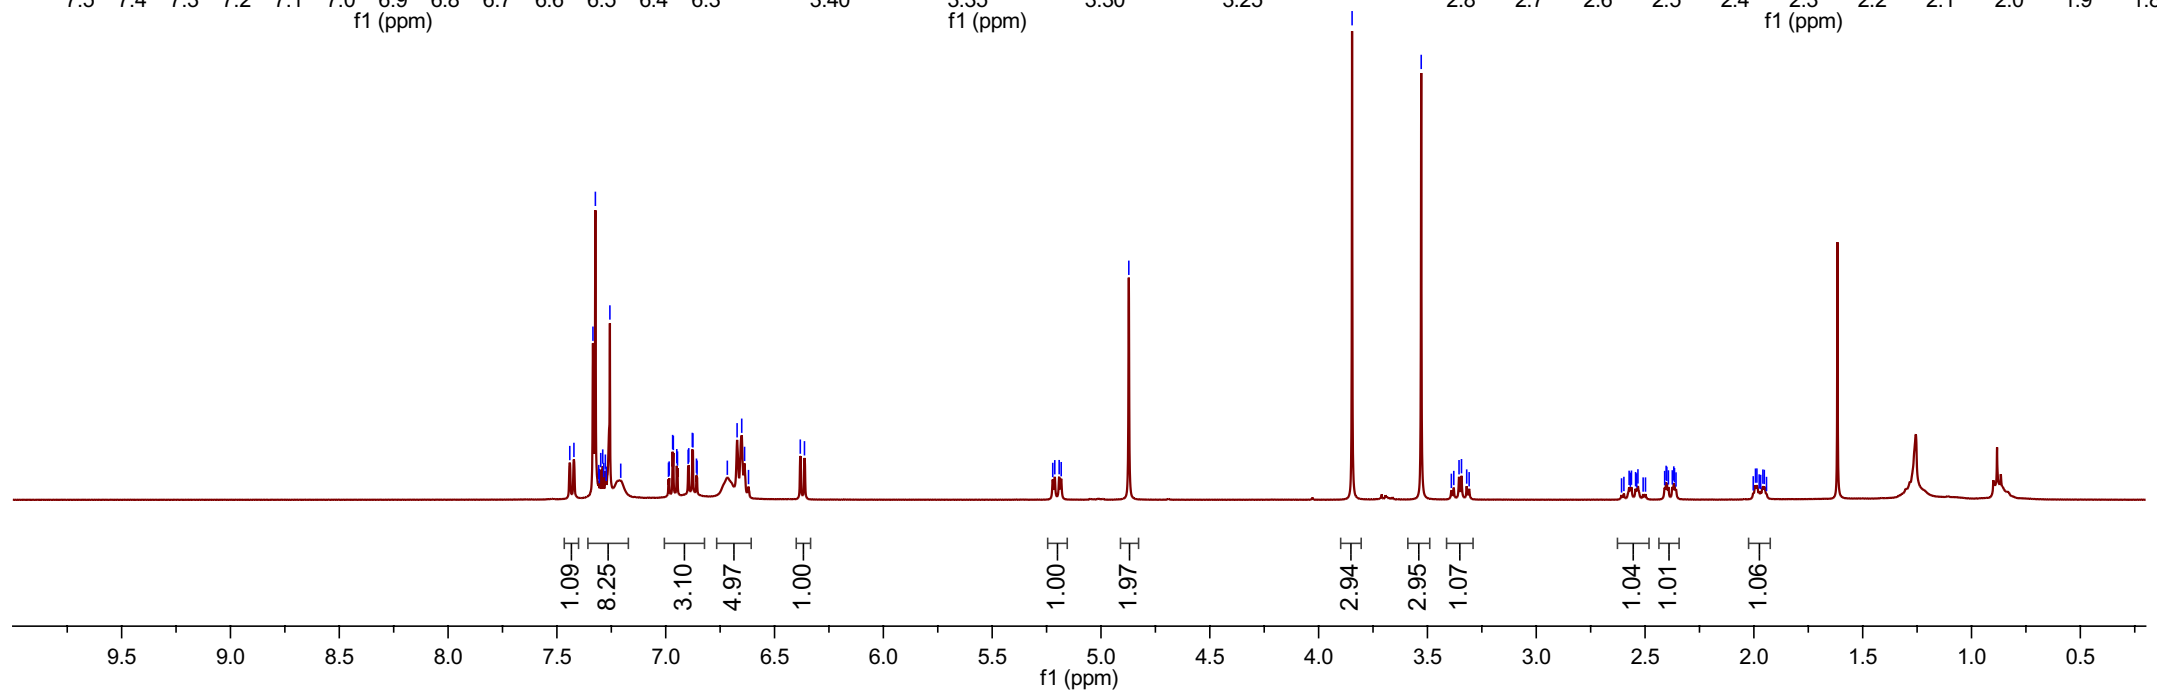

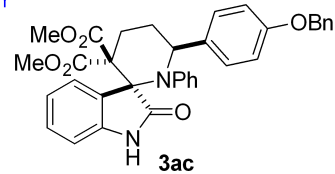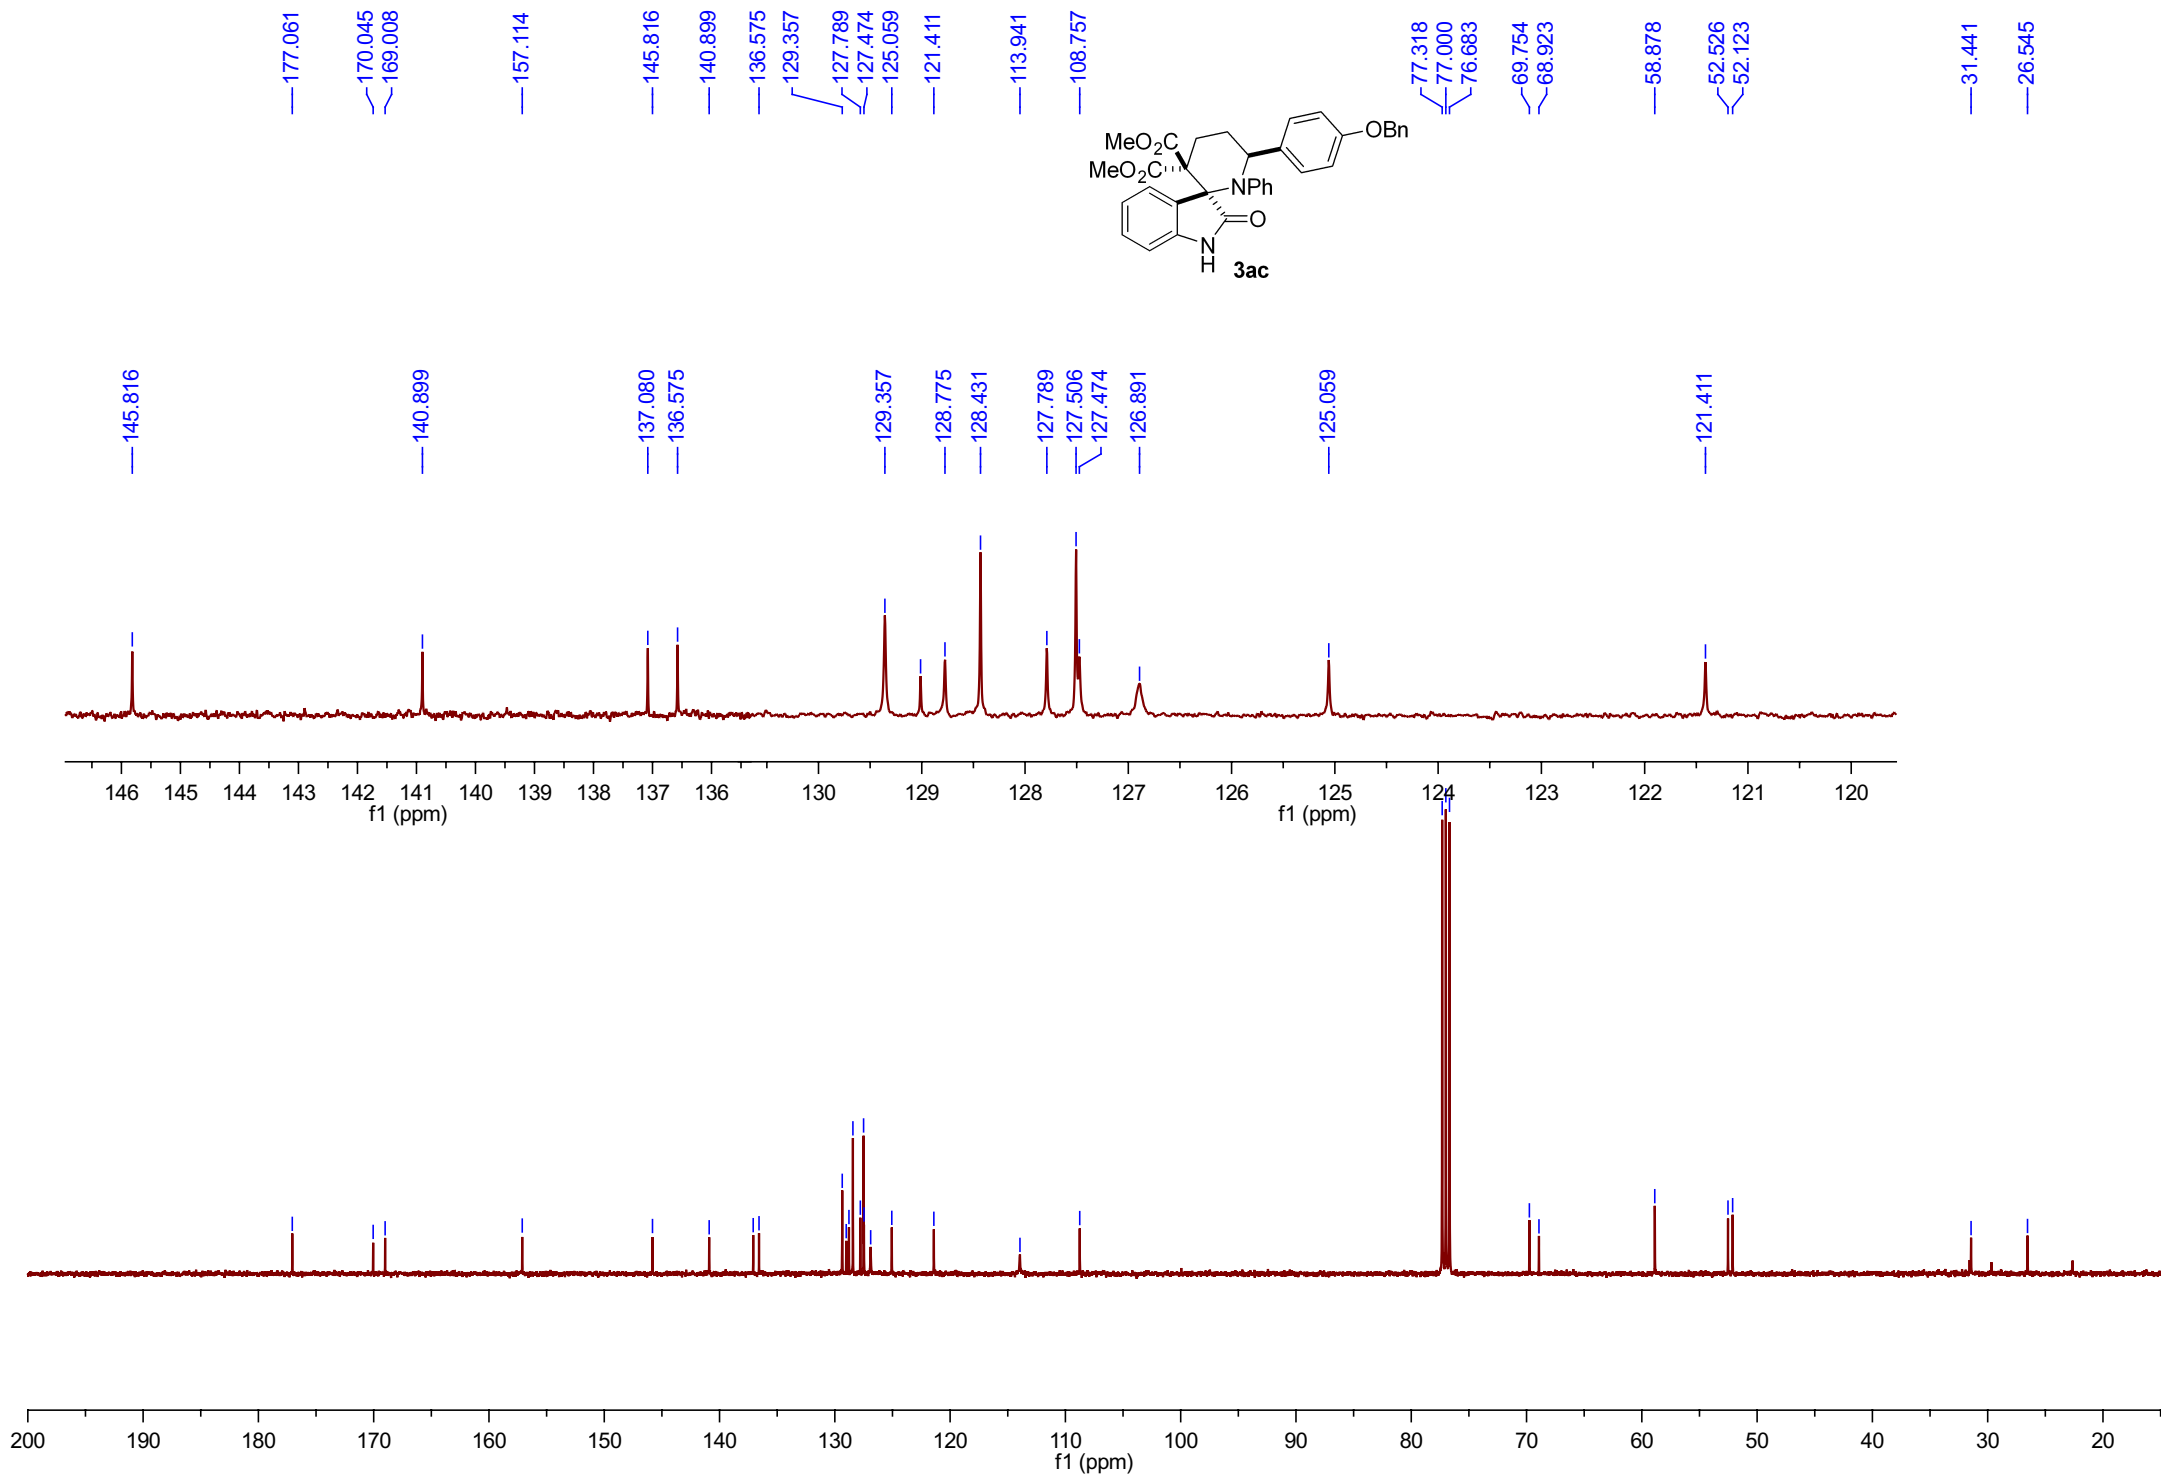

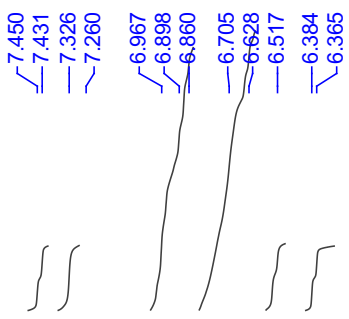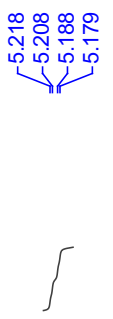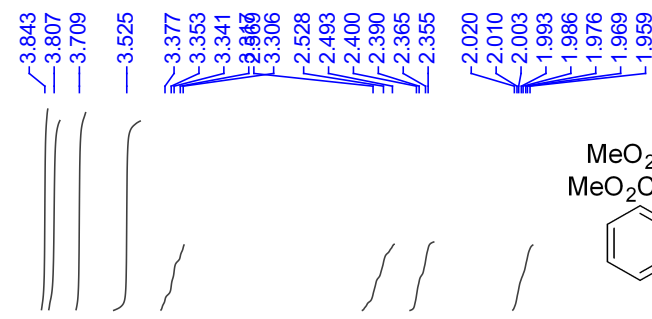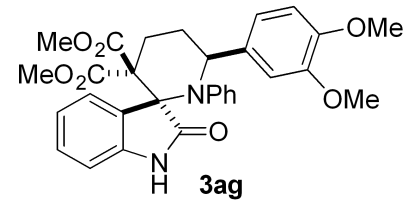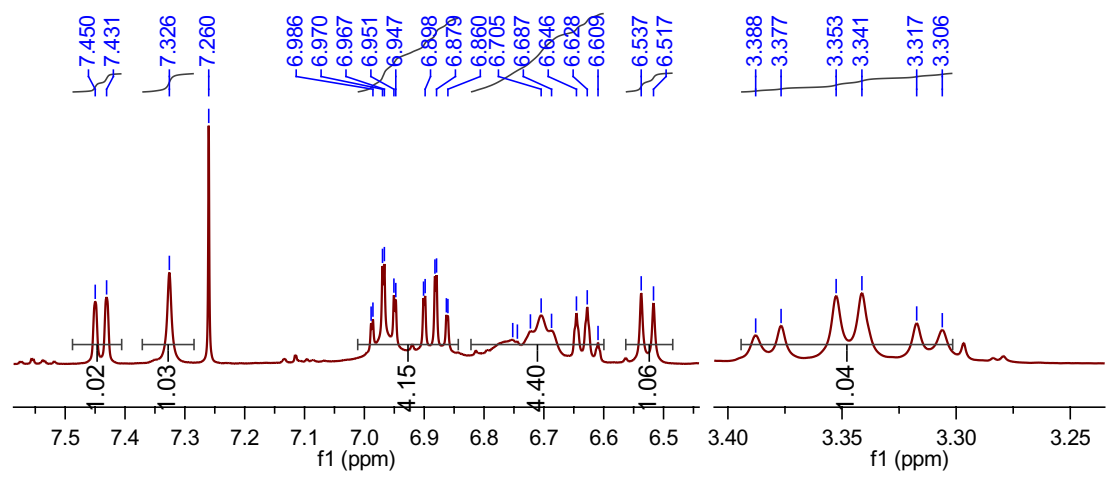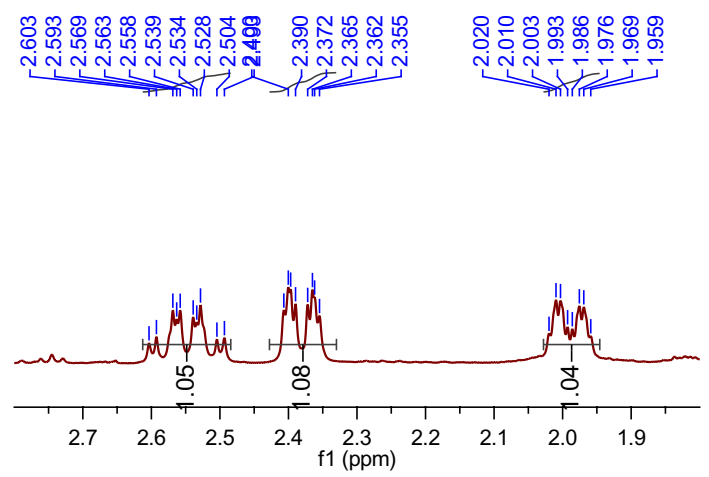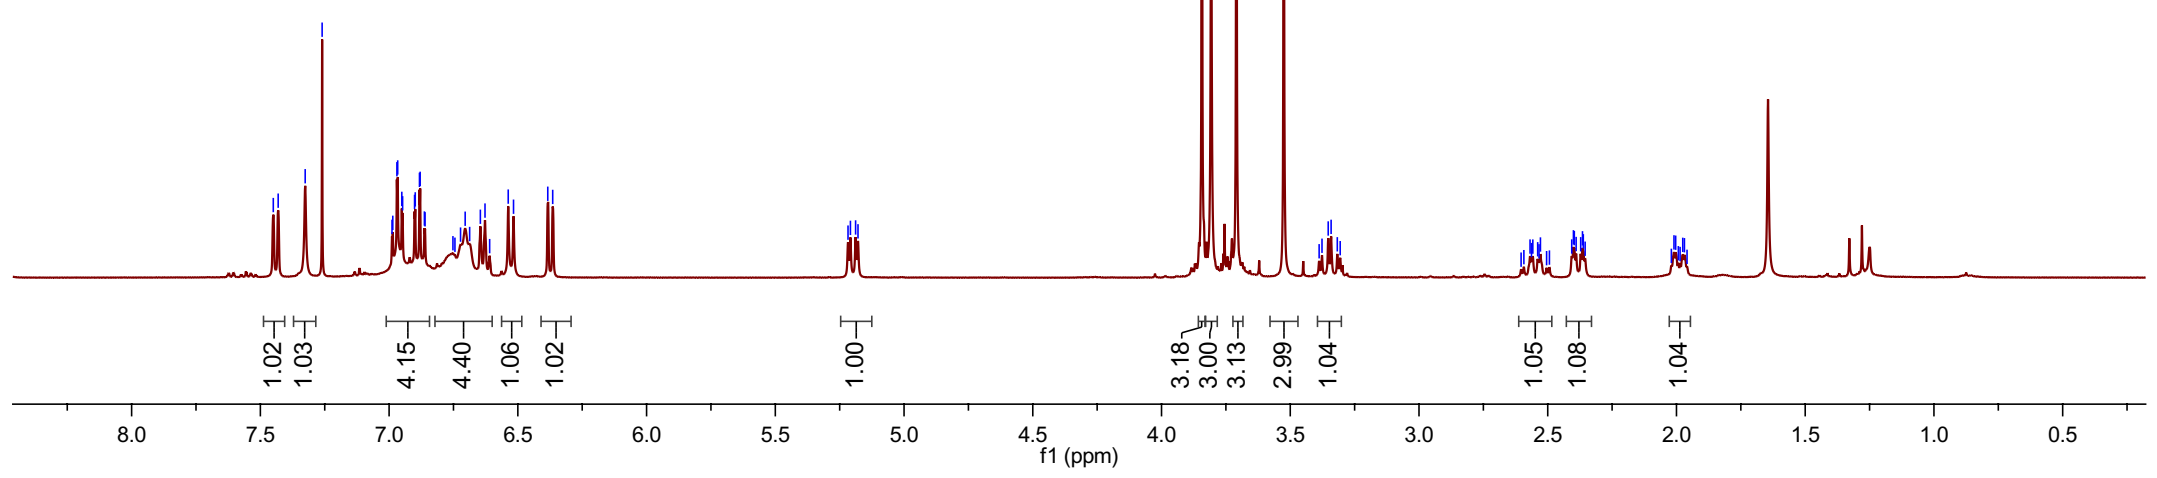

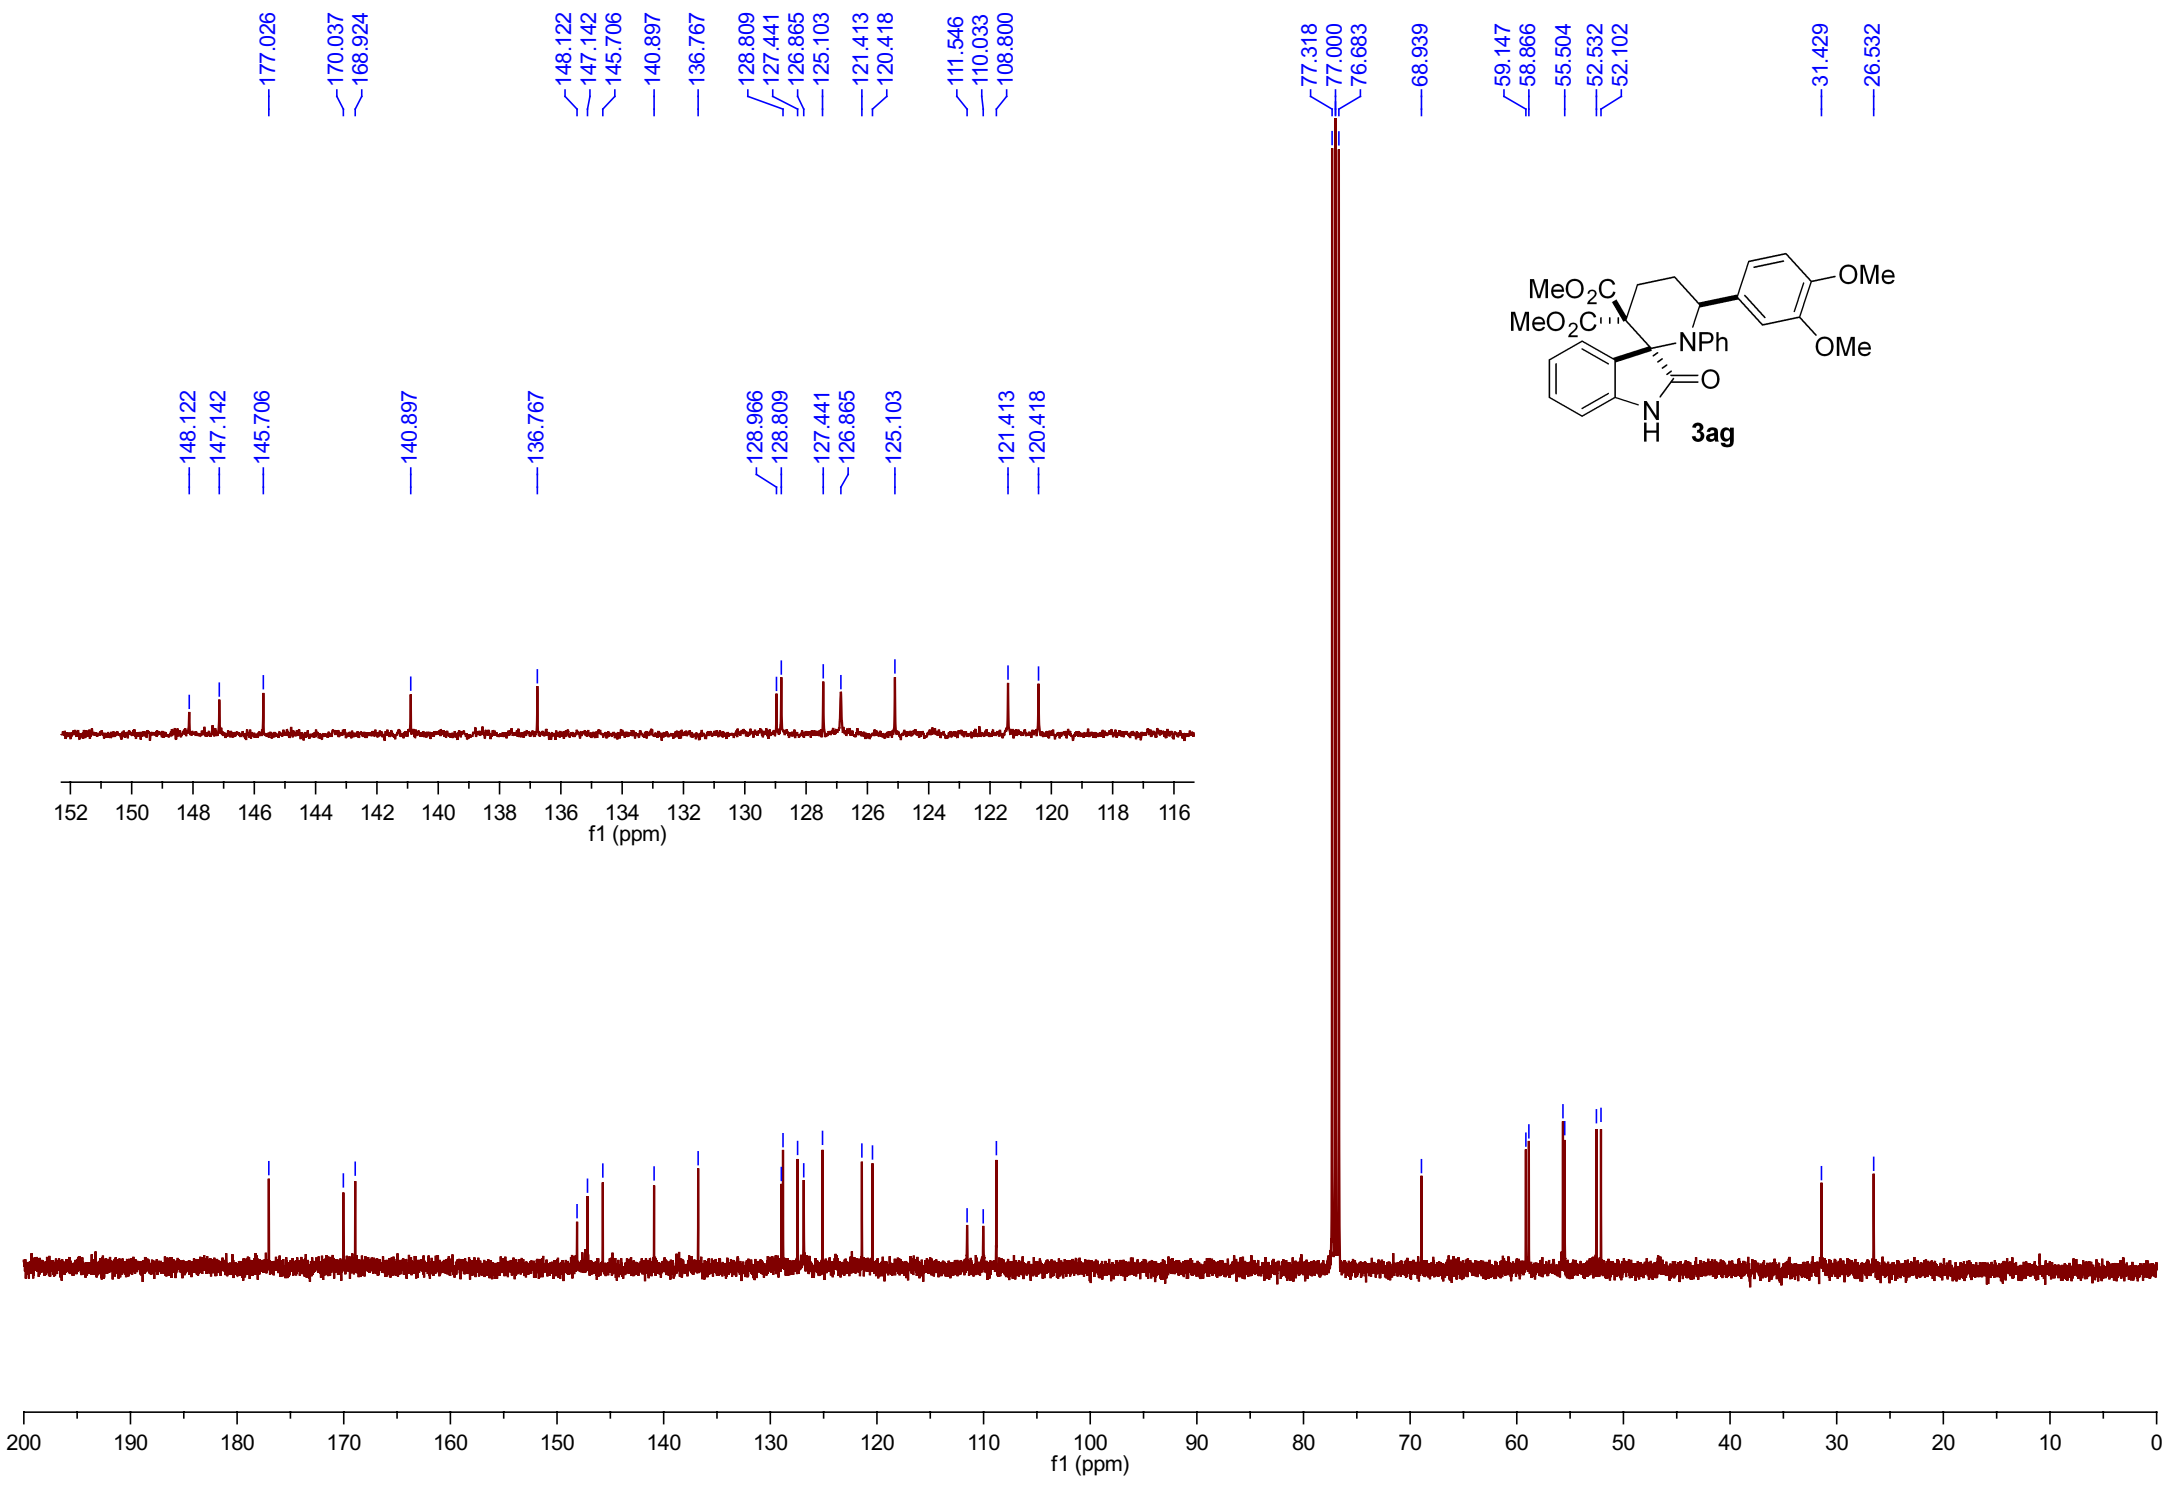

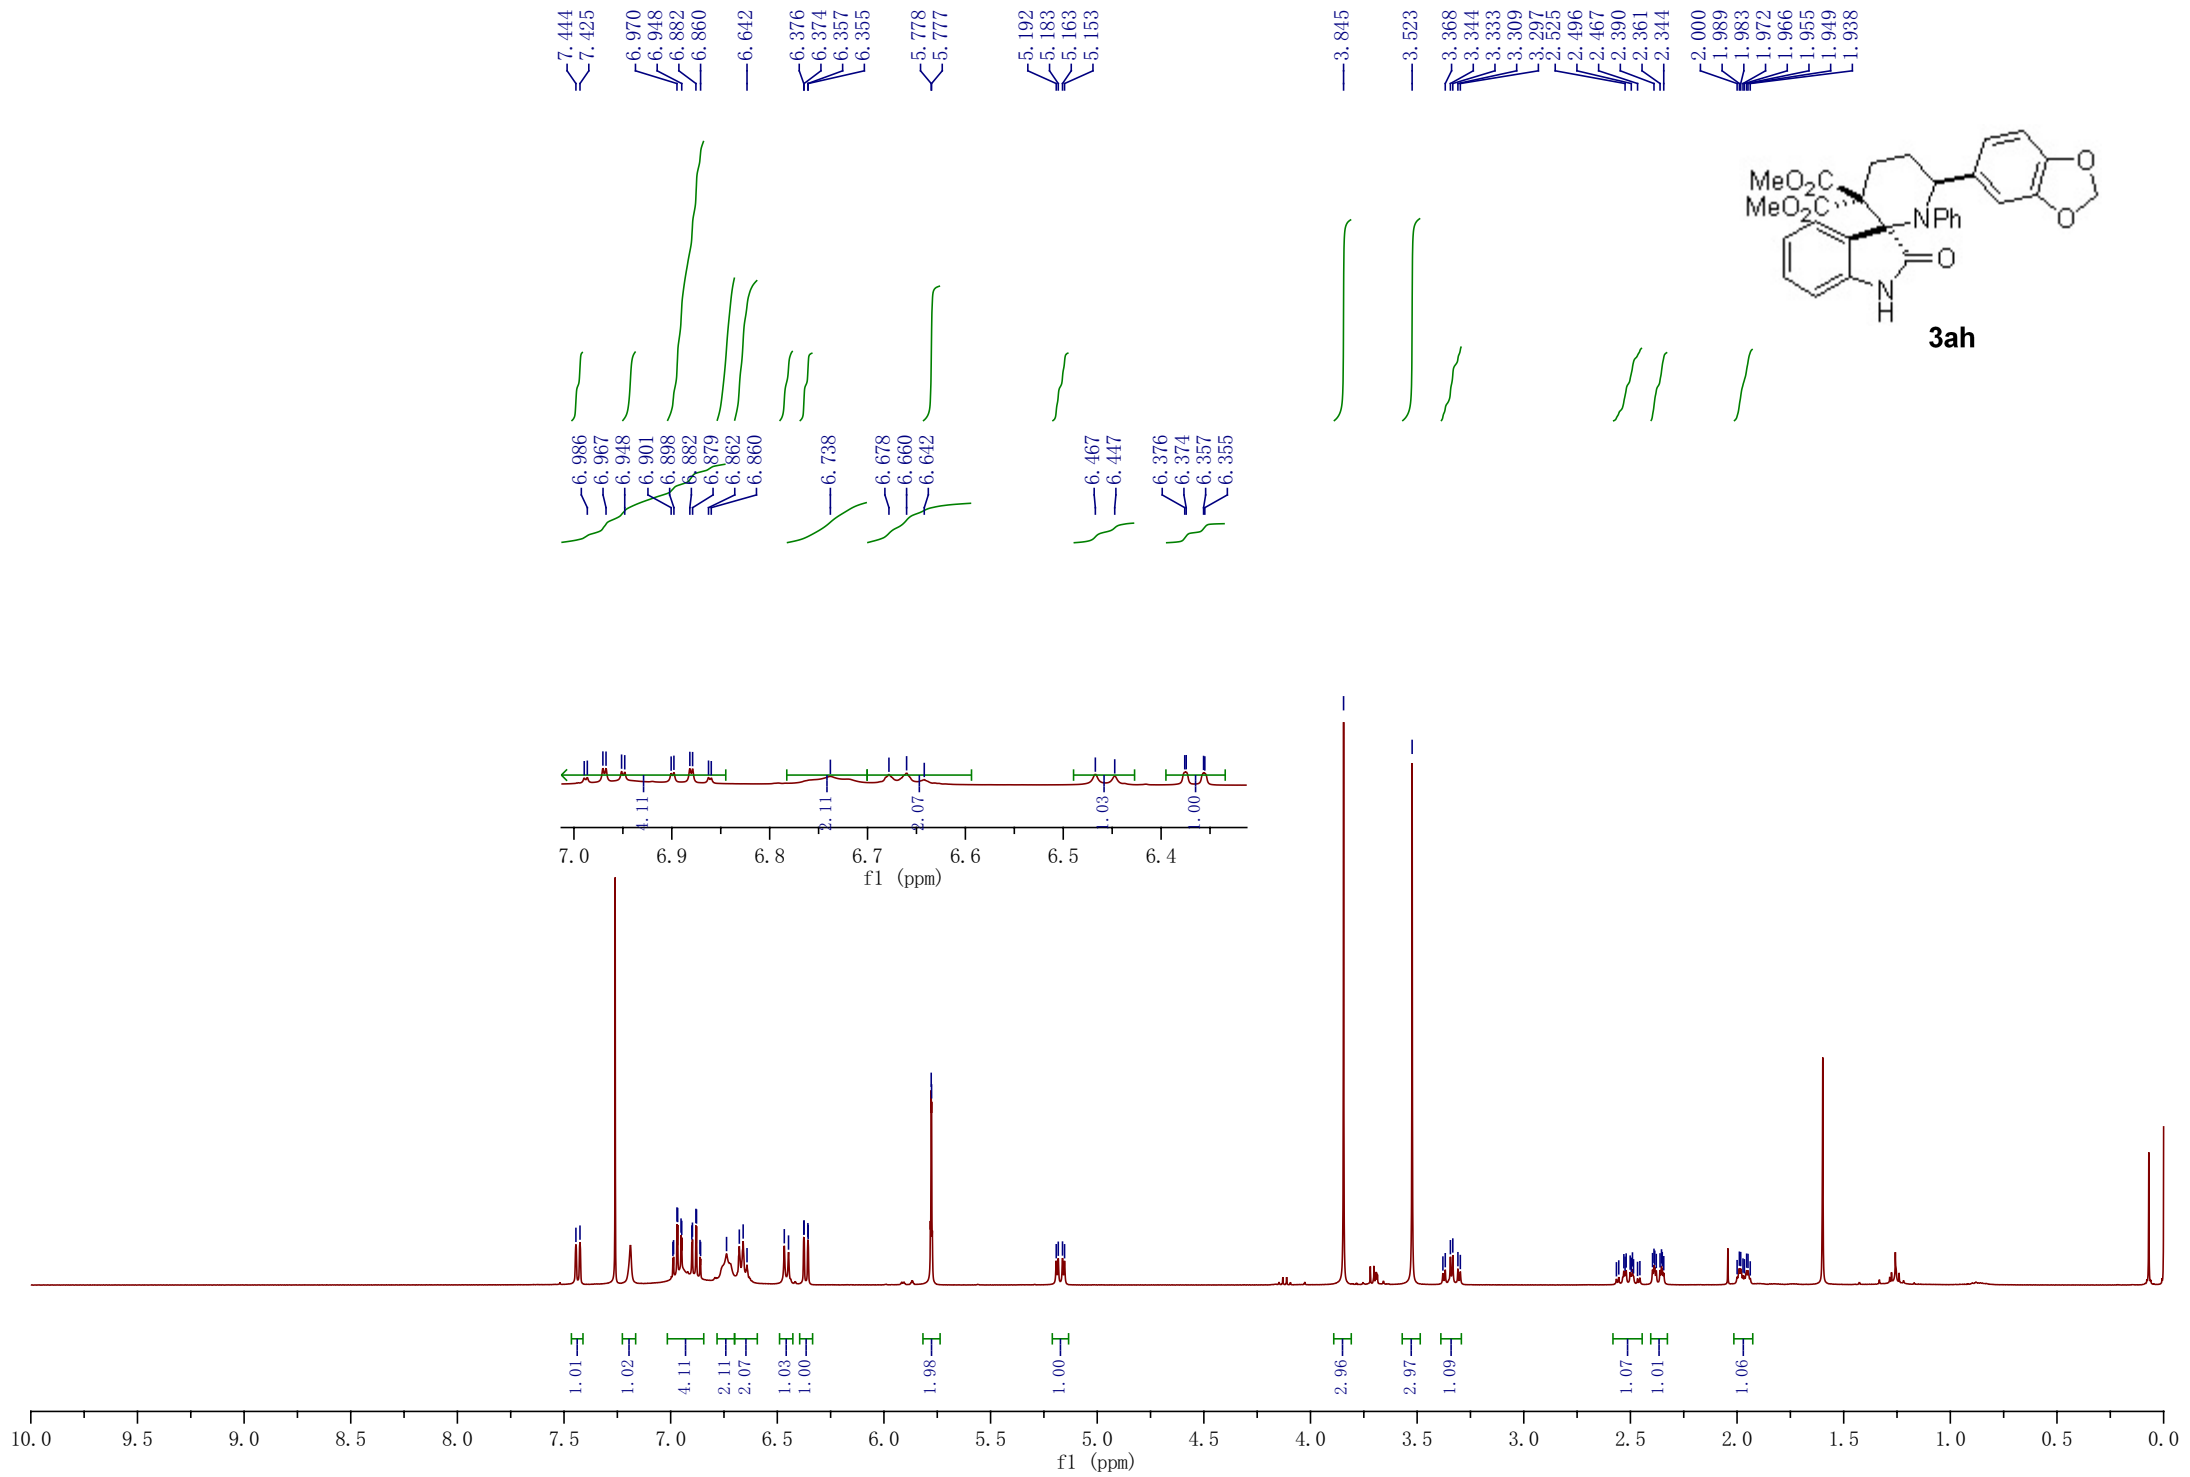

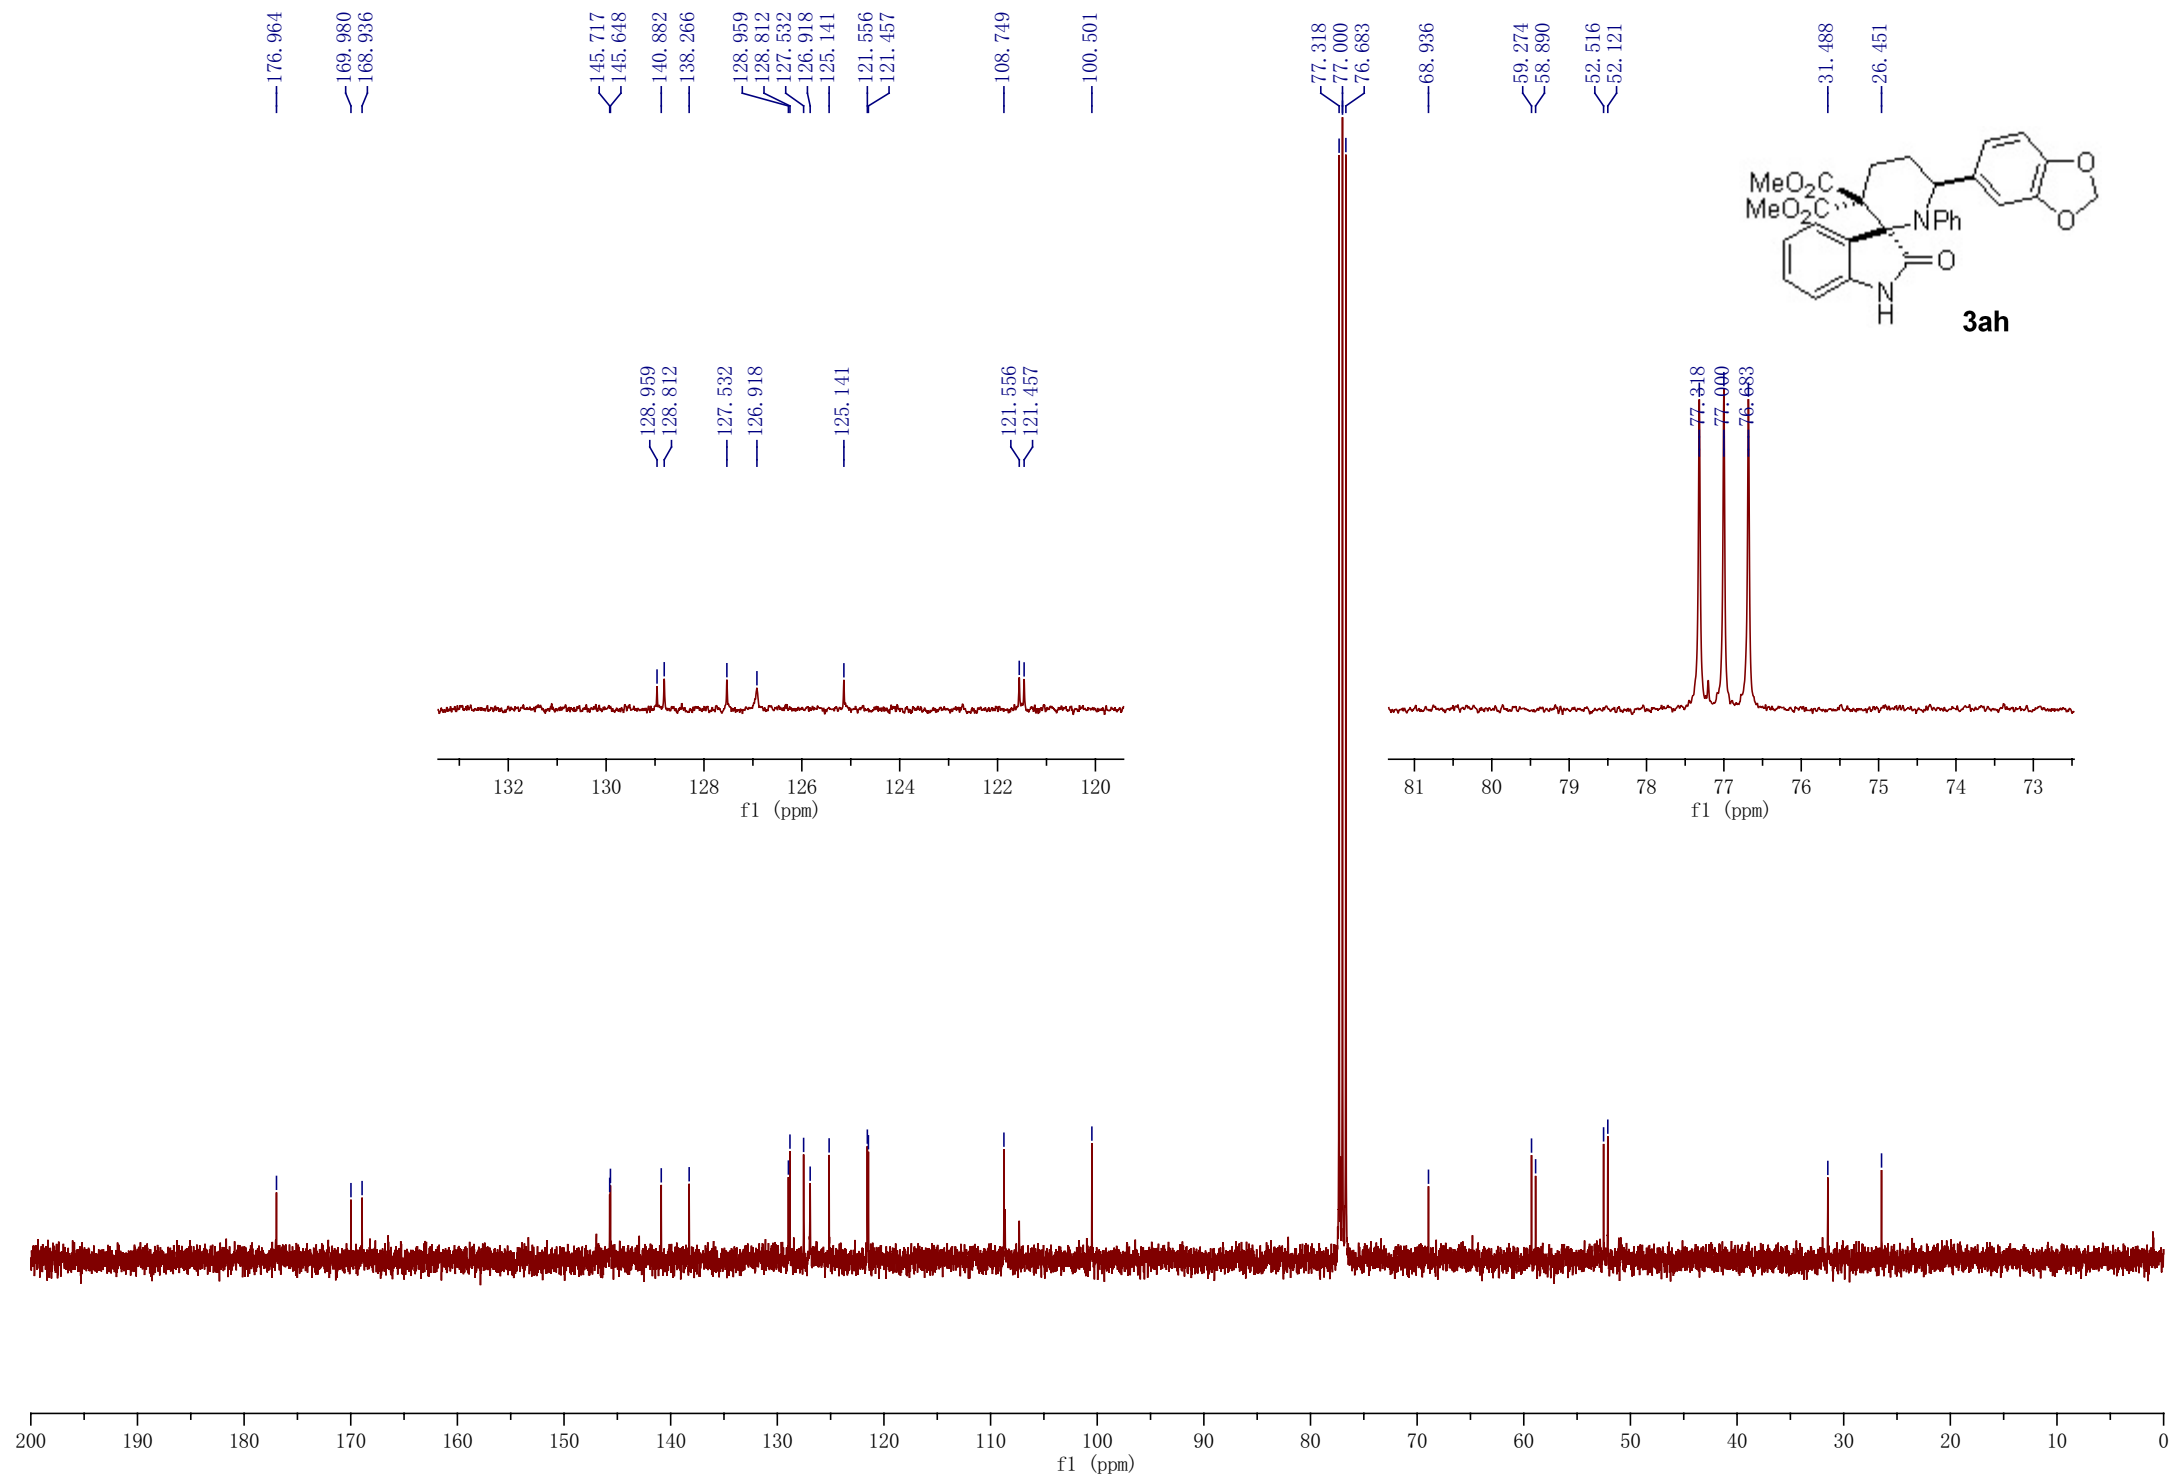



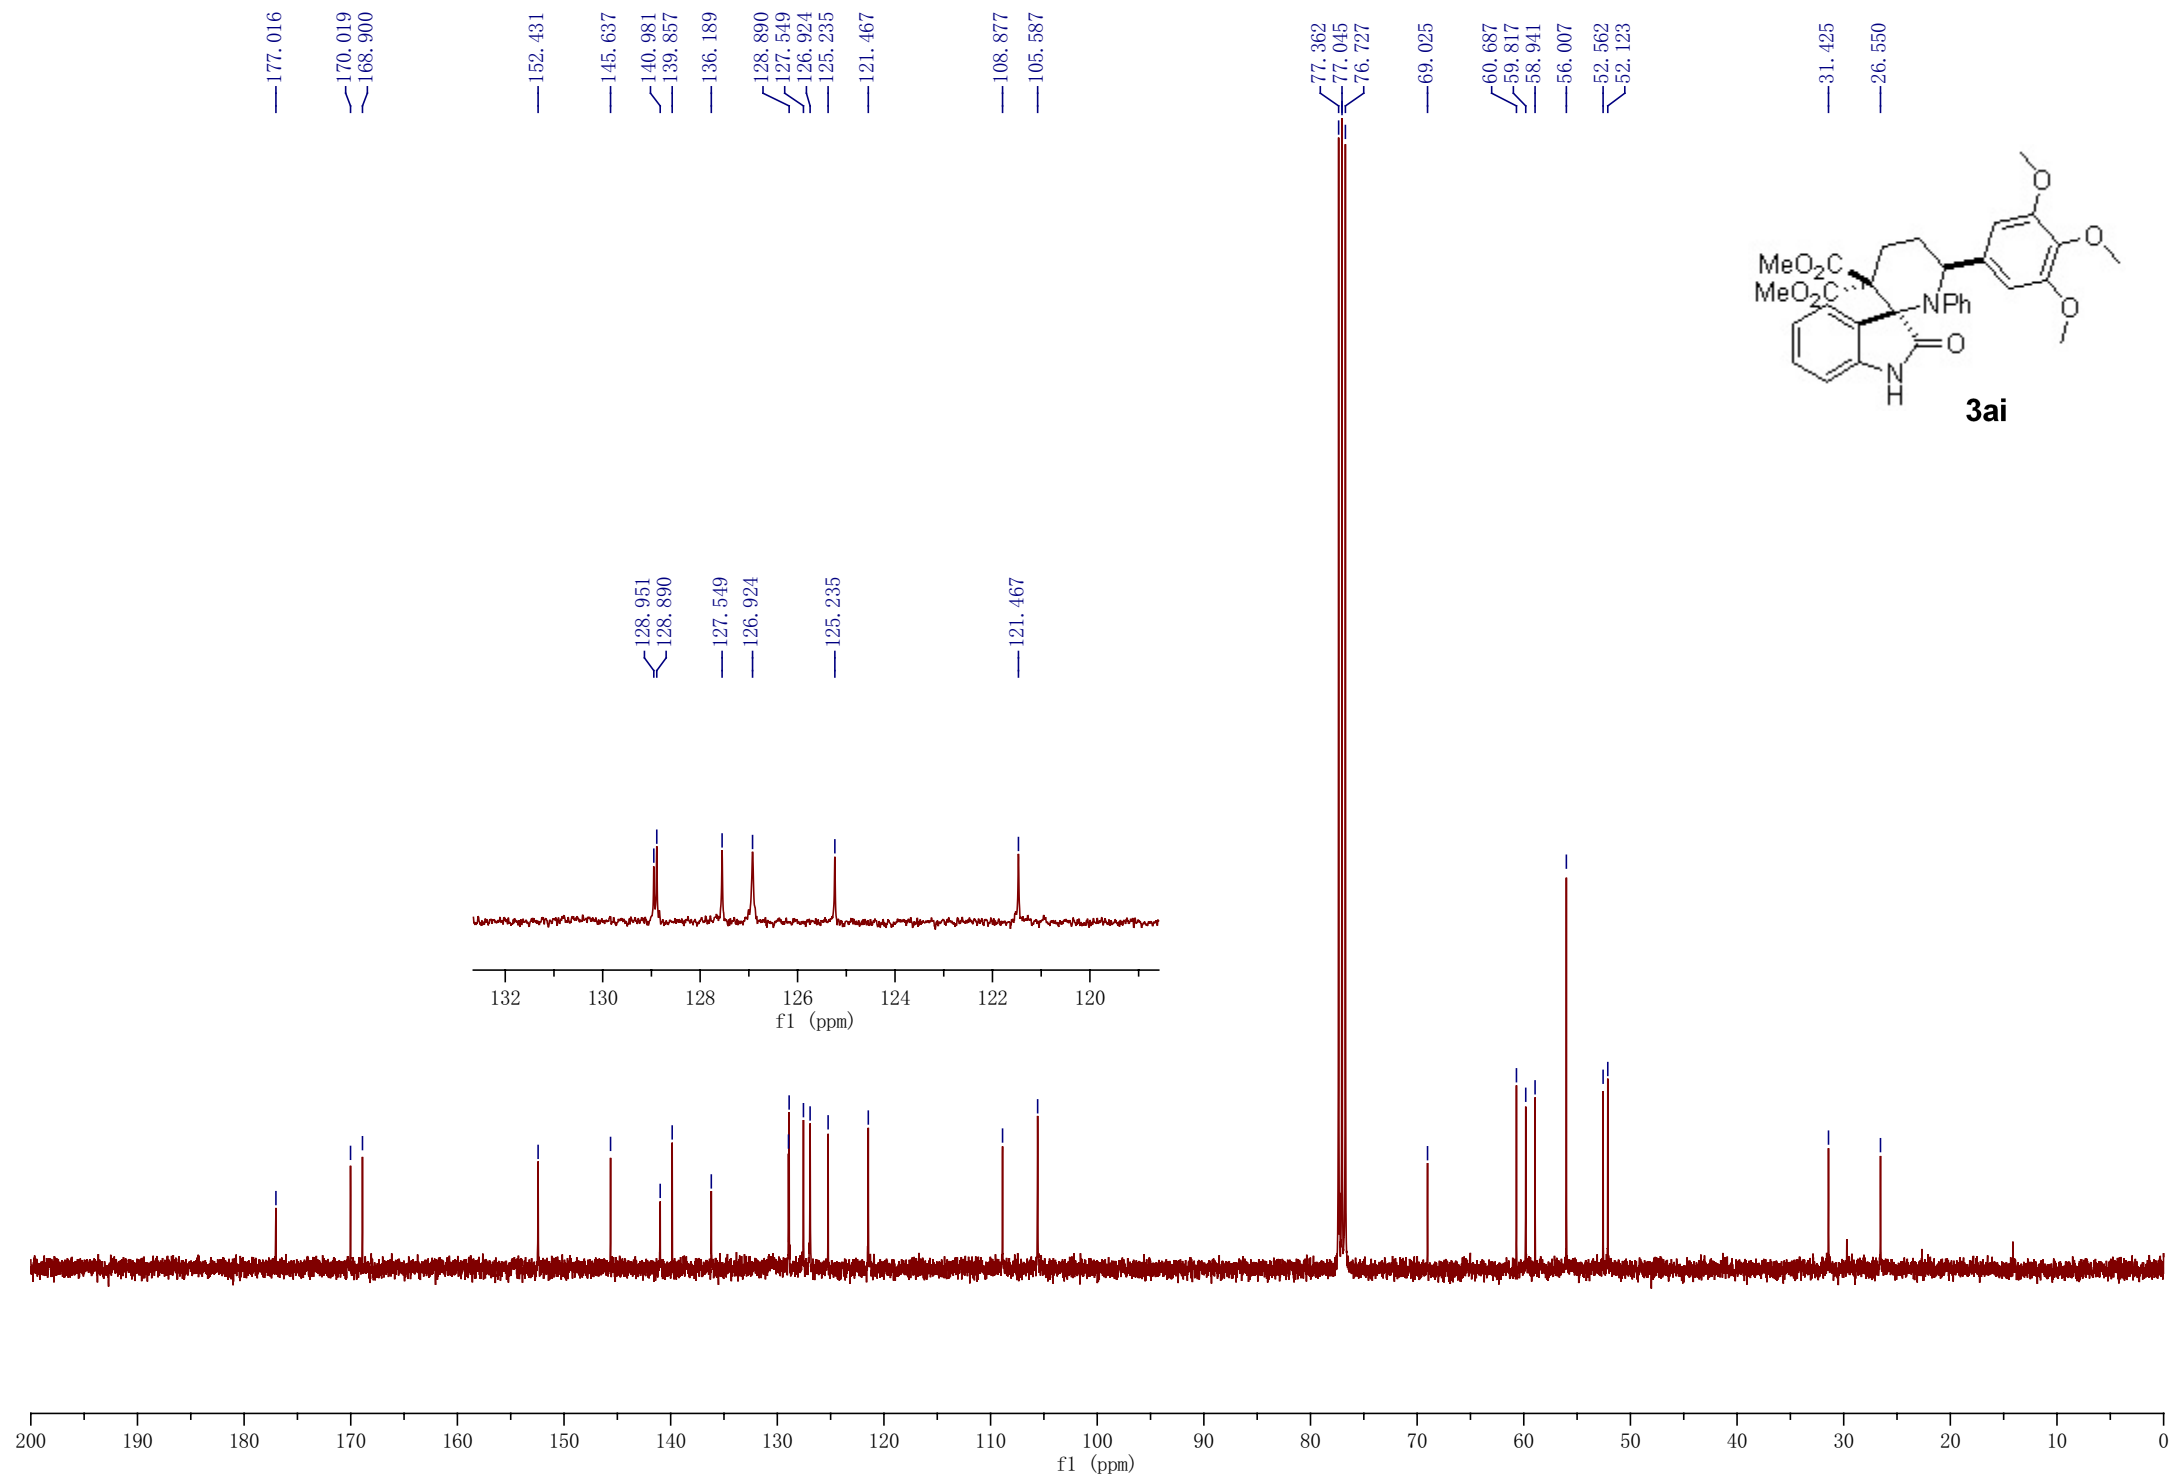



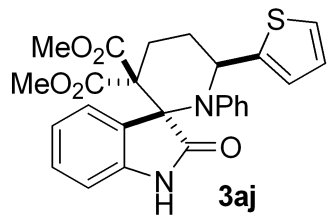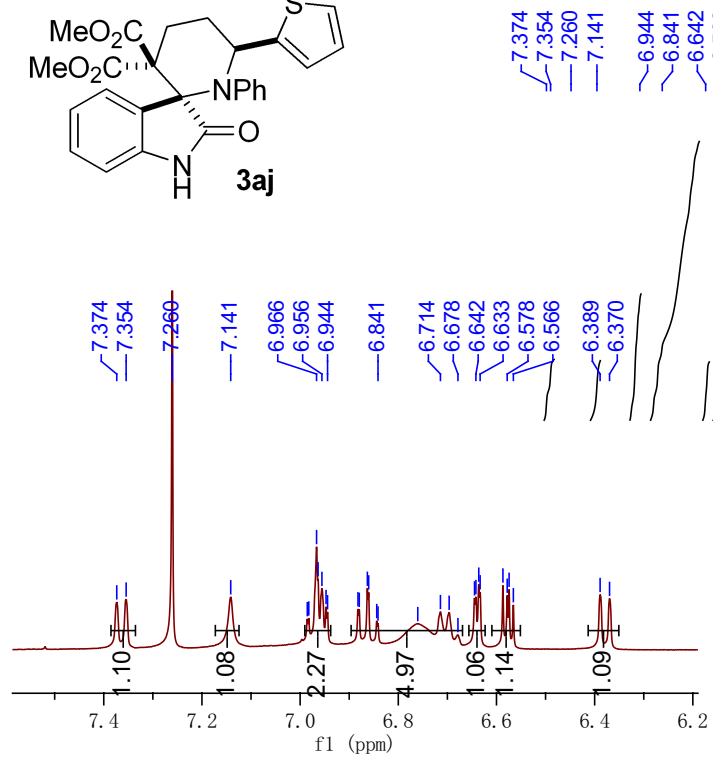

5.609  
5.599  
5.579  
5.570

3.867

3.543

3.360

3.325

3.288

2.758

2.734

2.724

2.688

2.425

2.390

2.180

2.170

2.164

2.153

2.146

2.136

2.129

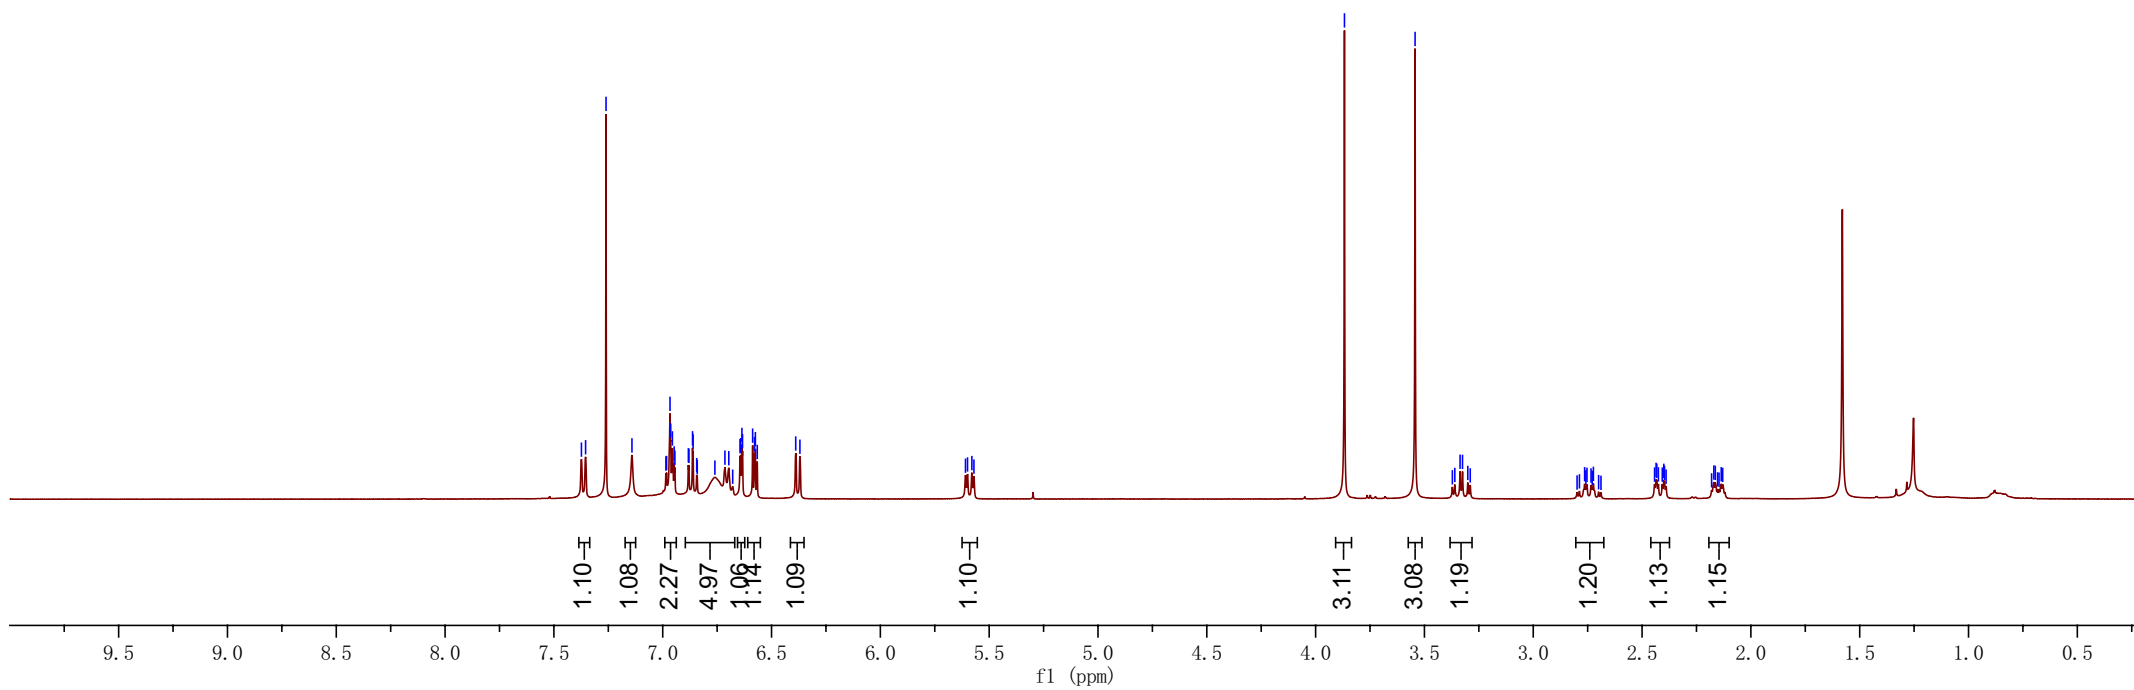

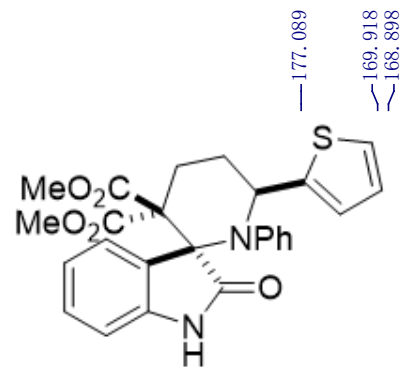

**3aj**

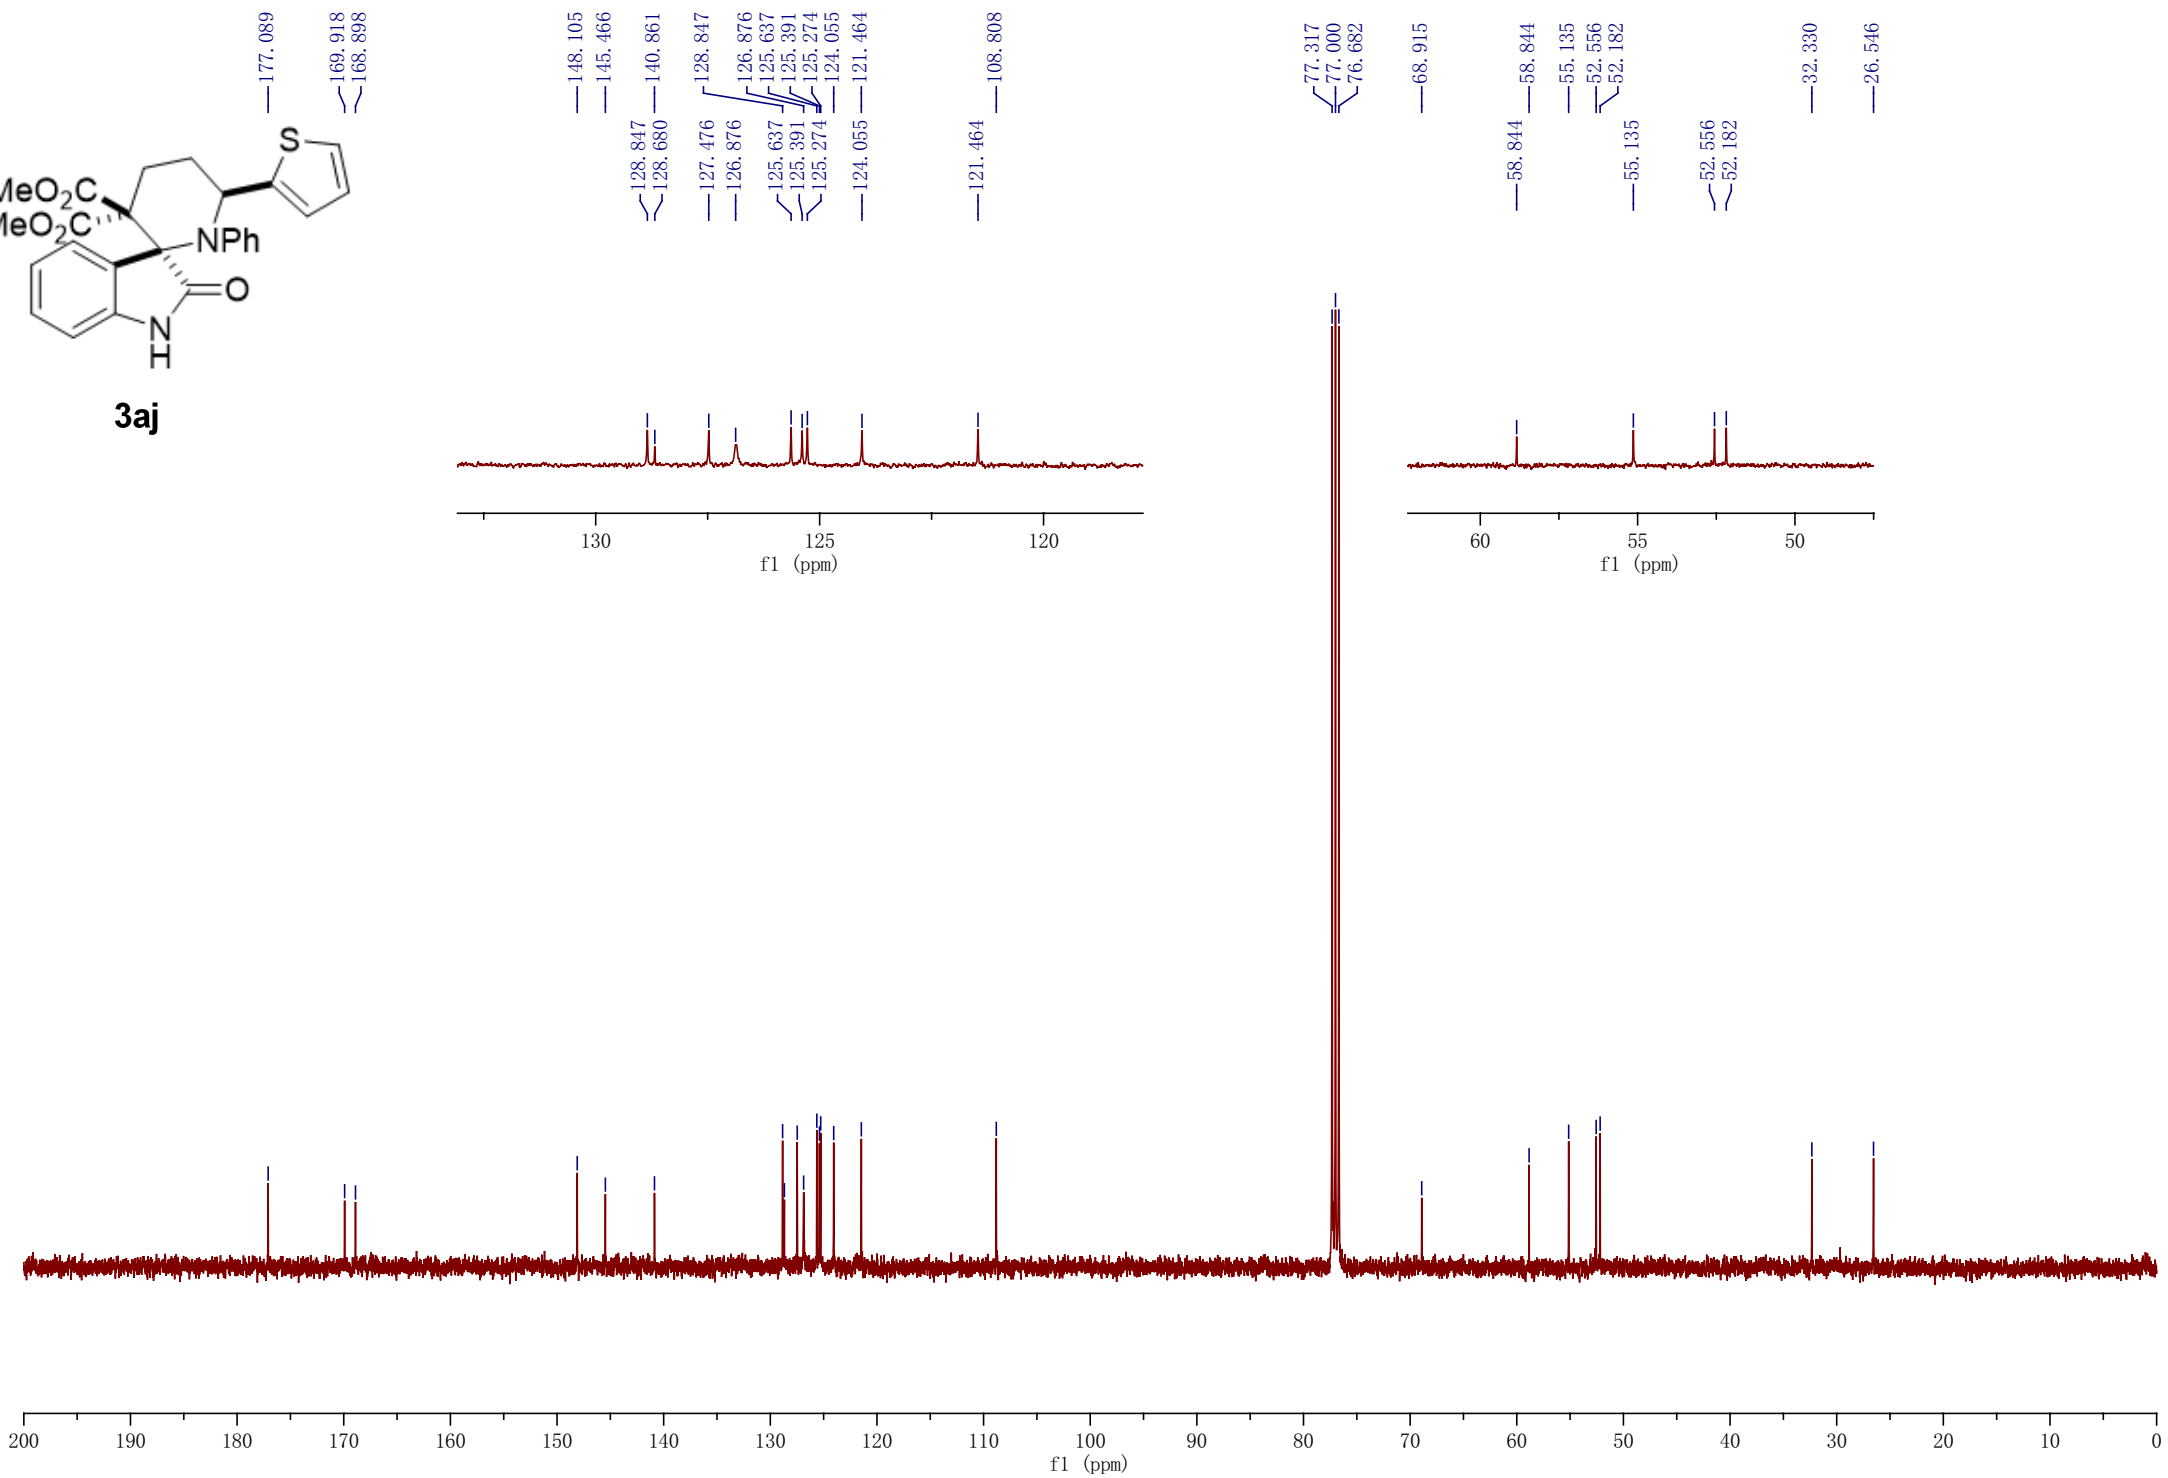

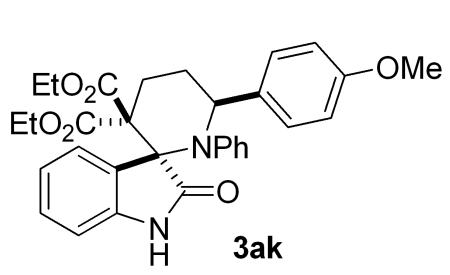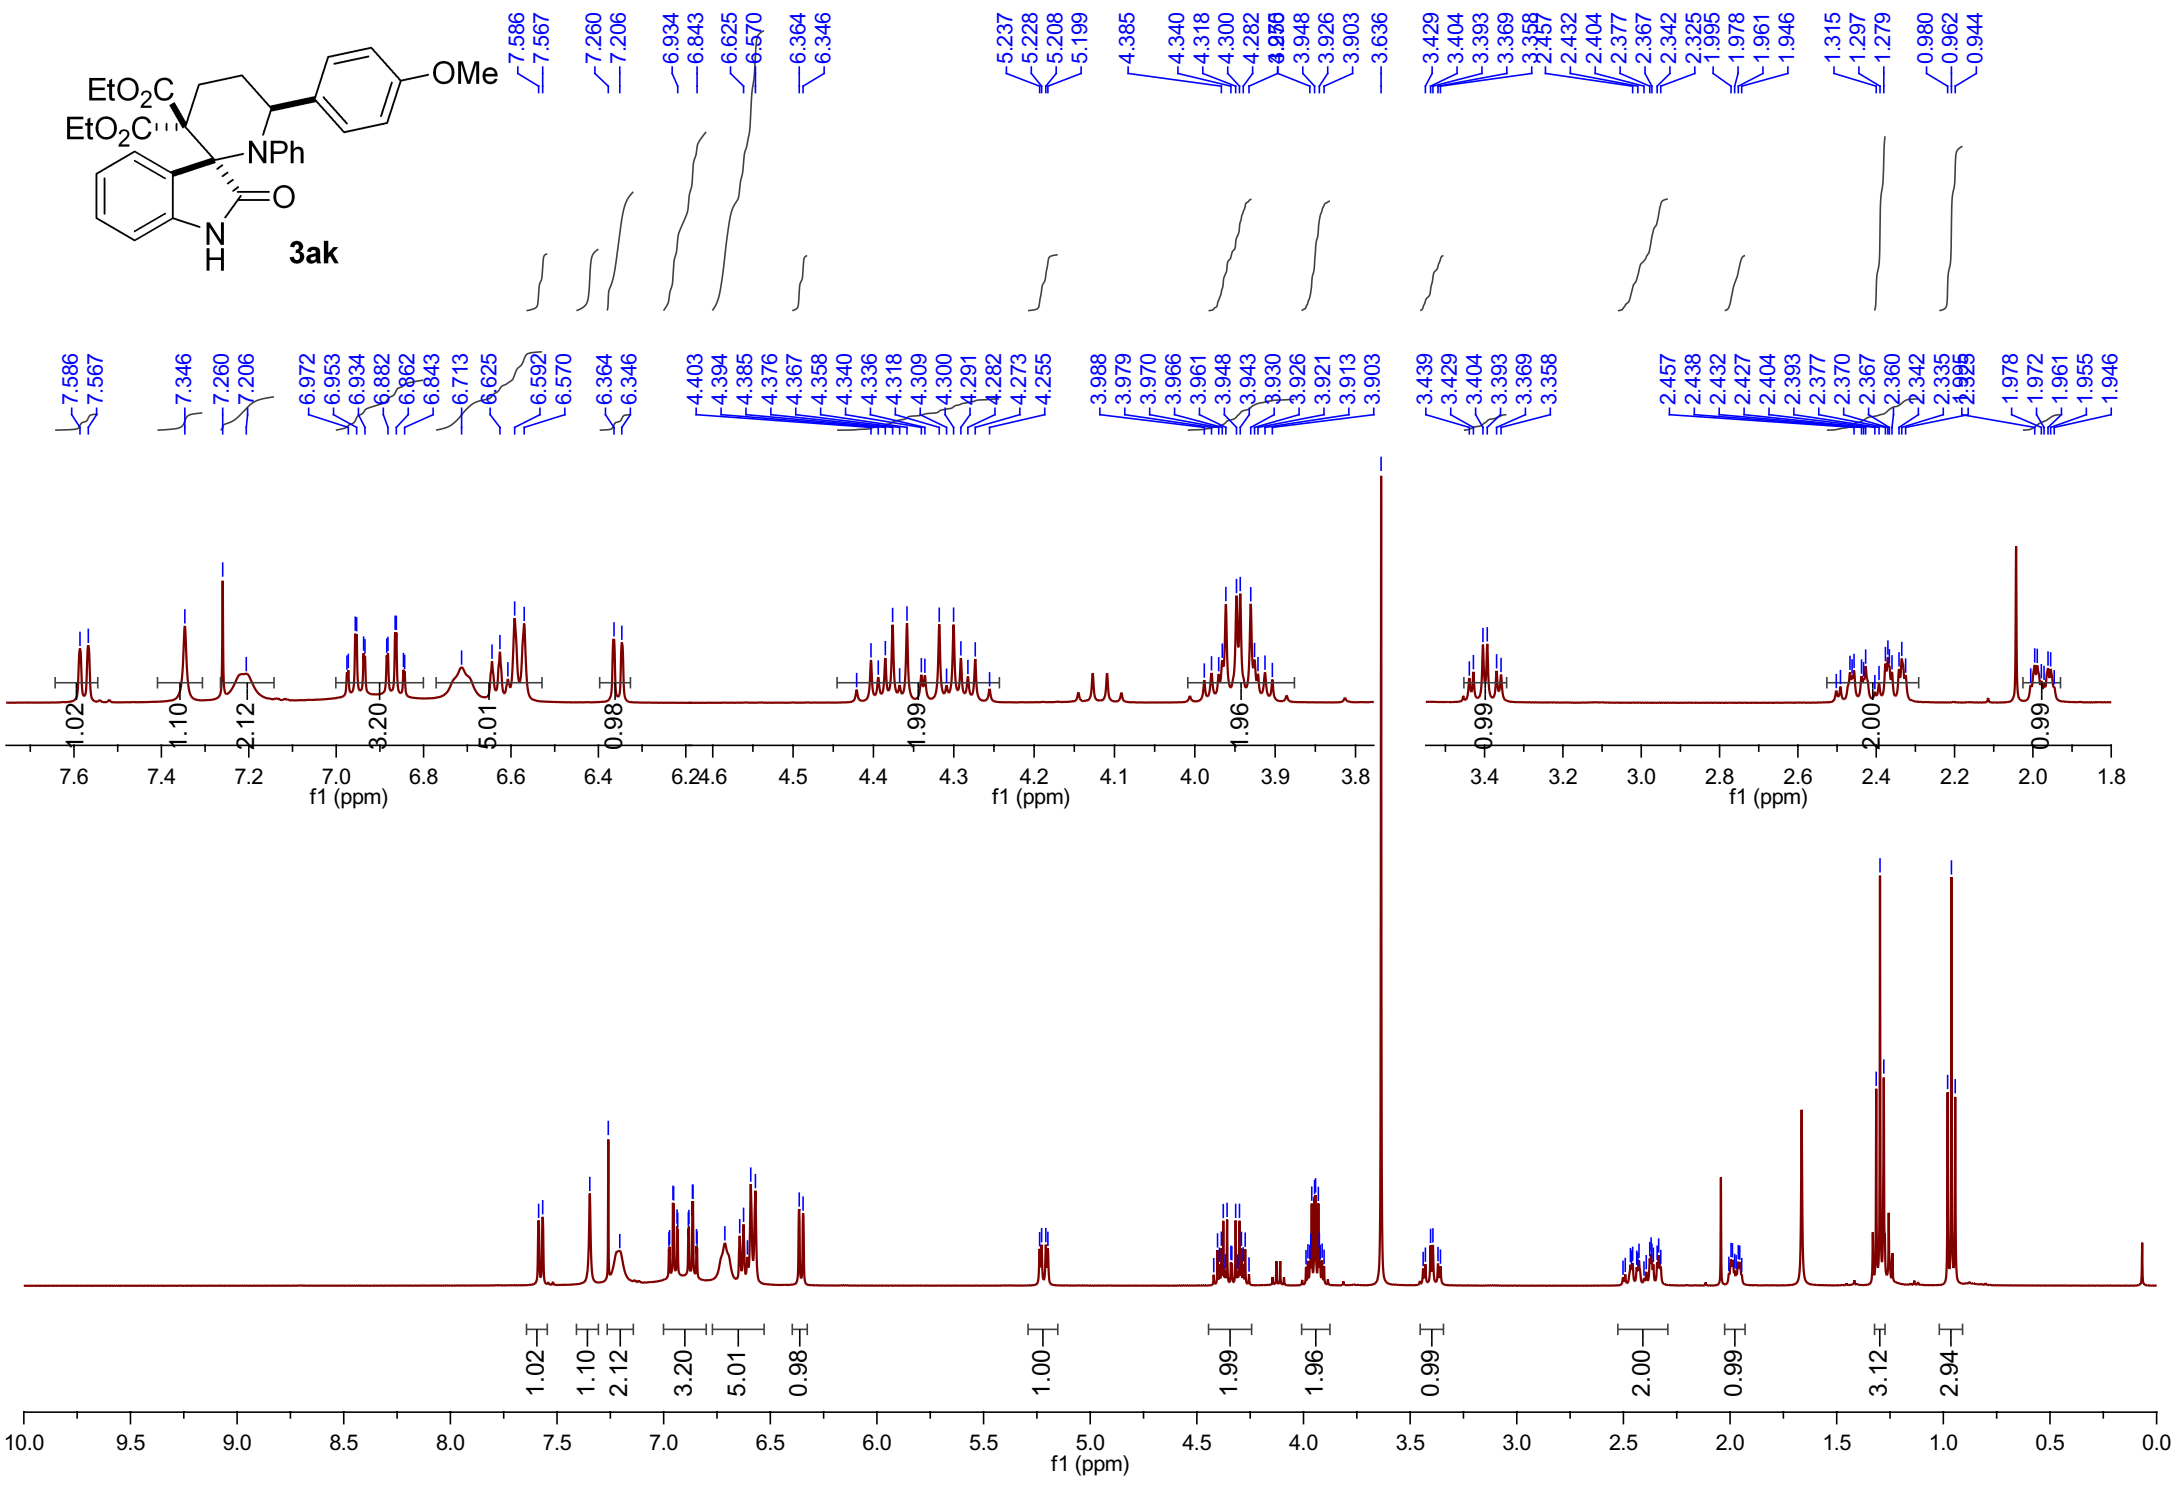

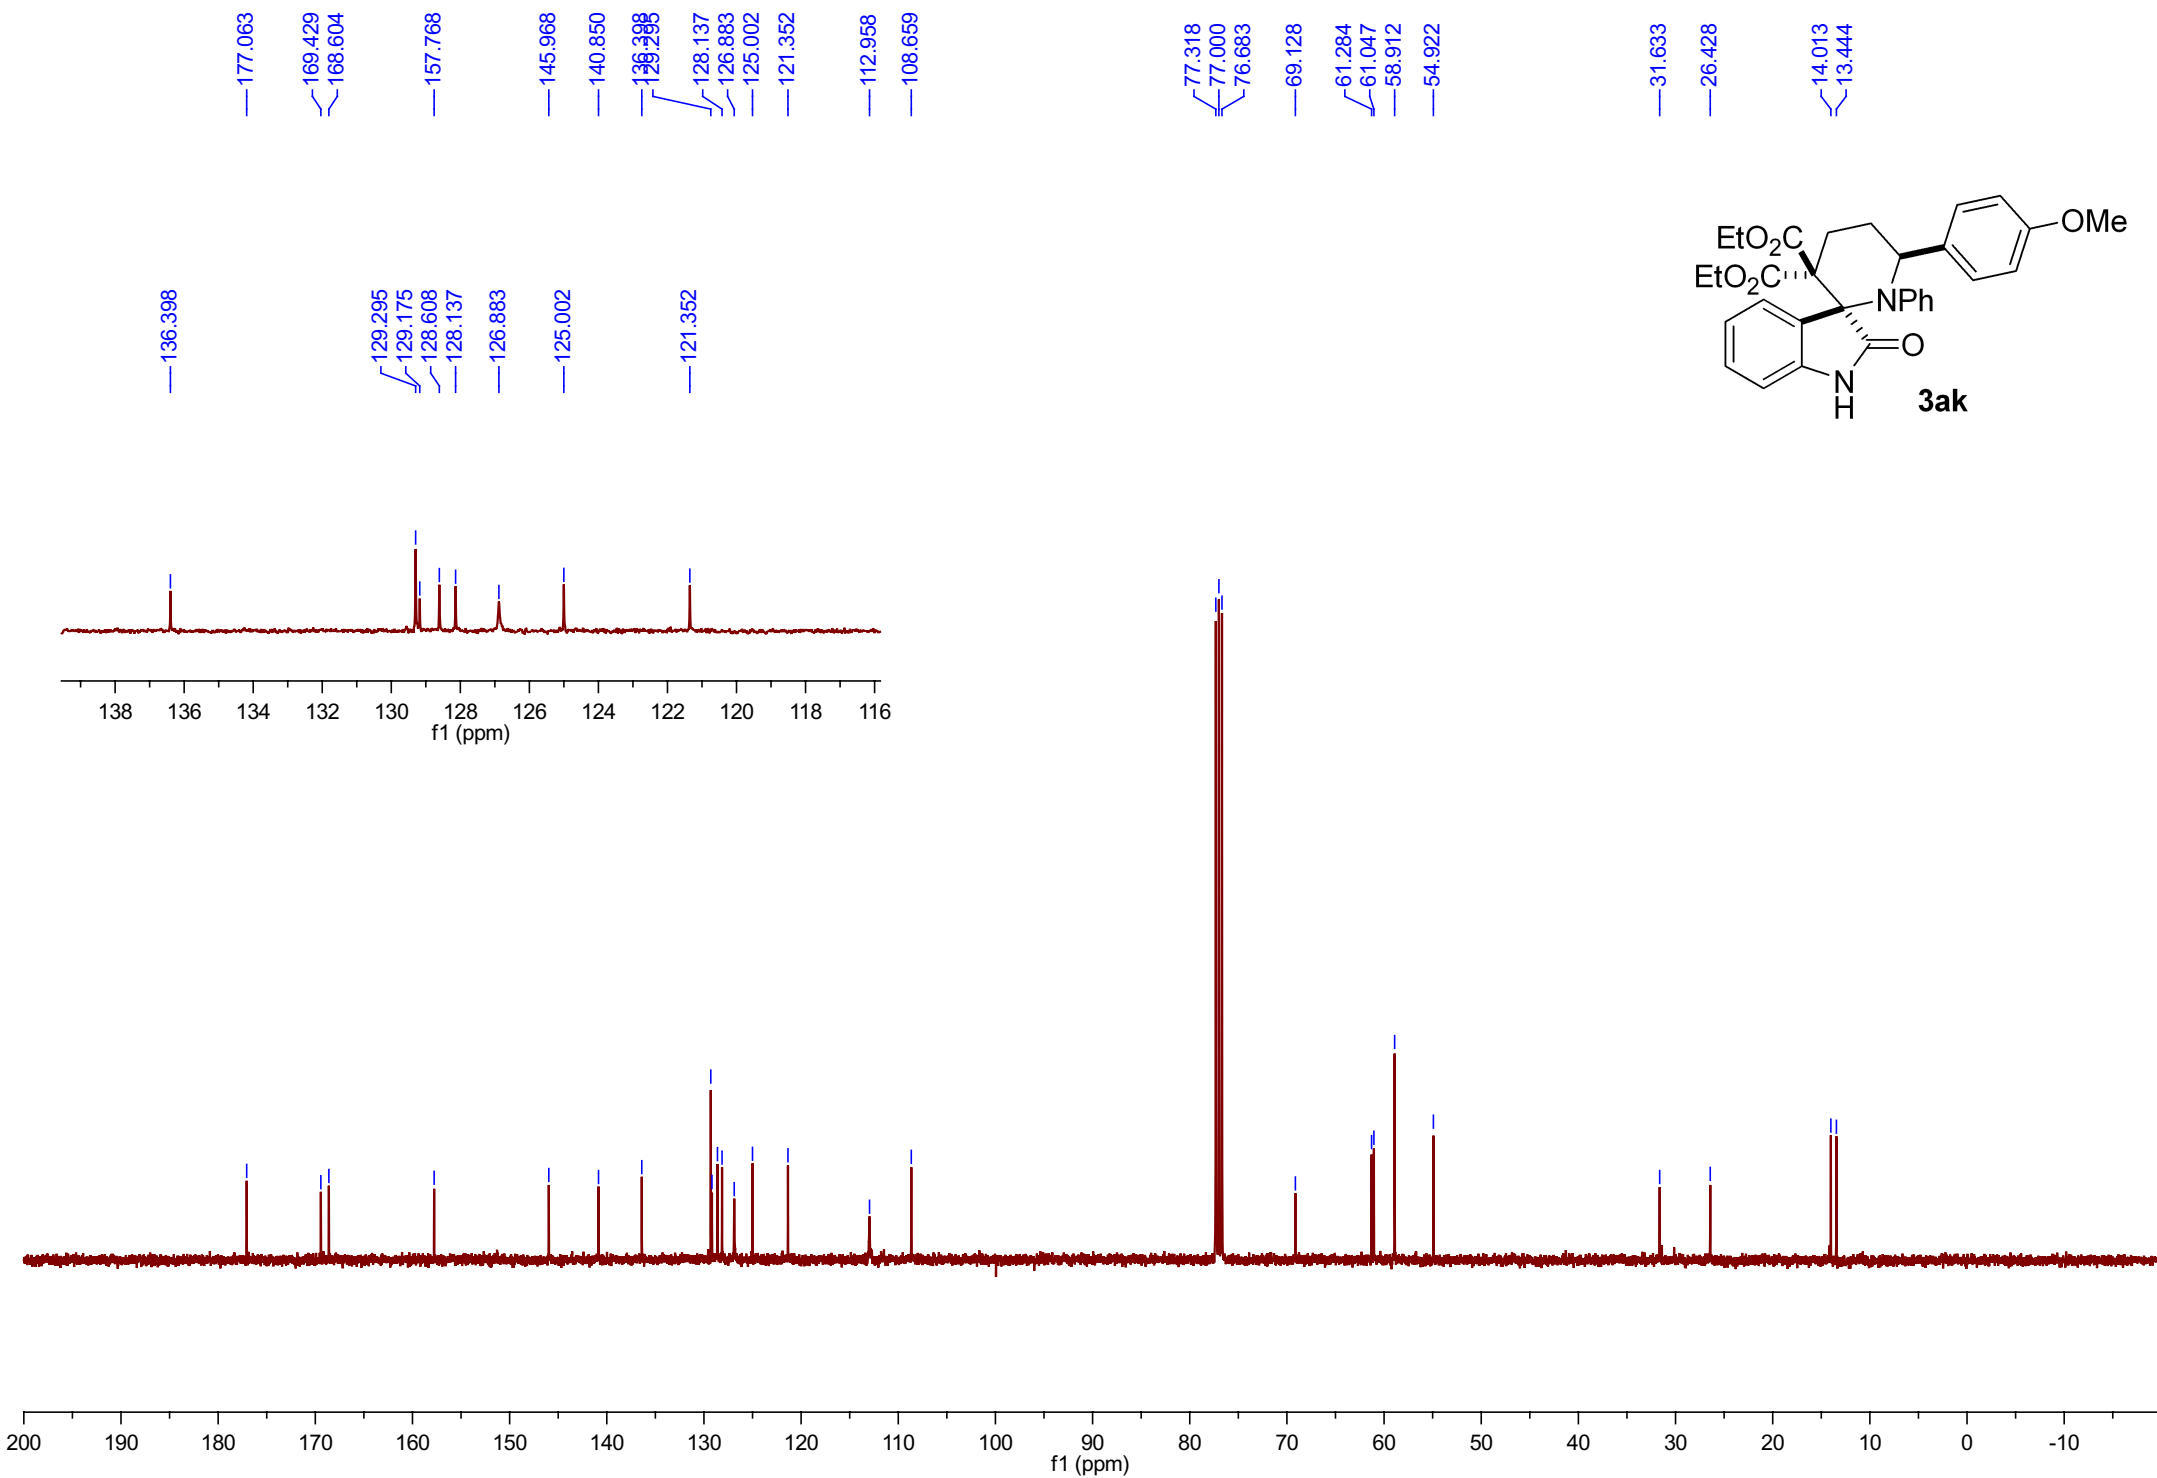

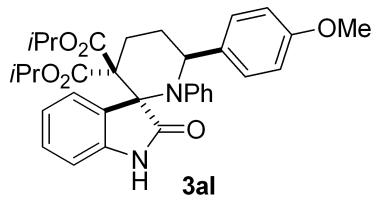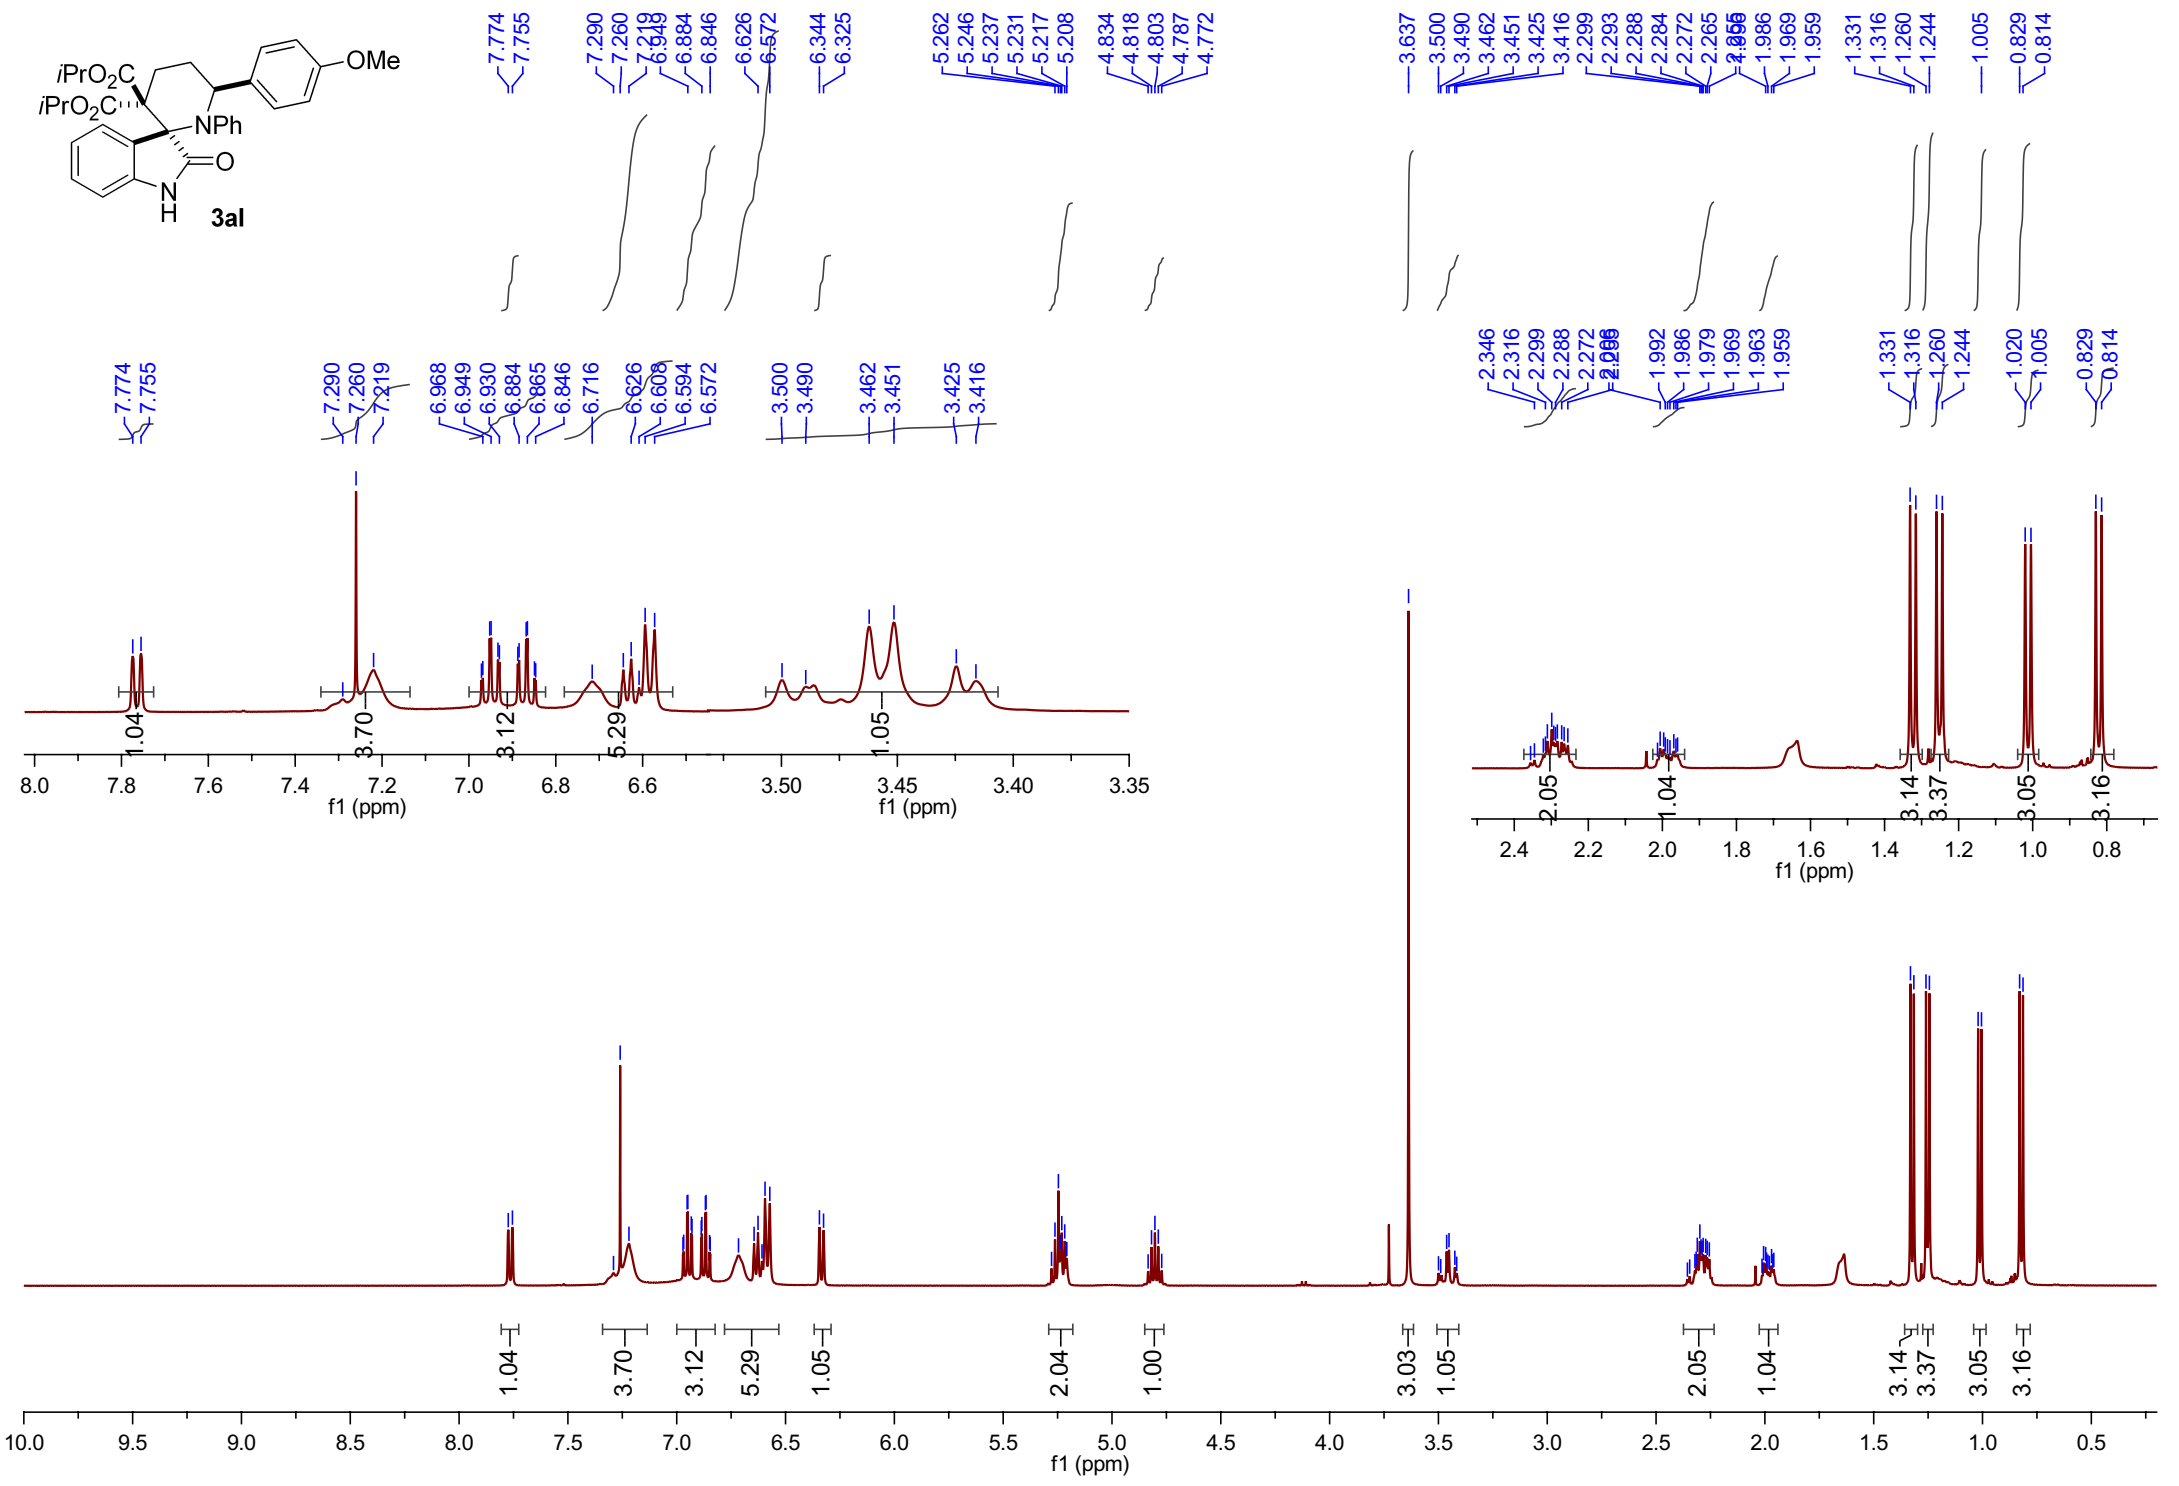

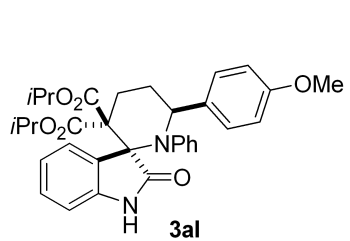

— 176.787  
 — 168.716  
 — 168.001  
 — 157.757  
 — 146.083  
 — 140.746  
 — 136.532  
 — 129.269  
 — 128.500  
 — 124.962  
 — 121.442  
 — 112.978  
 — 108.606

77.318  
 77.000  
 76.683  
 69.348  
 68.768  
 68.736  
 58.960  
 58.853  
 54.924

— 31.813  
 — 26.414  
 — 21.684  
 — 21.600  
 — 21.228  
 — 20.676

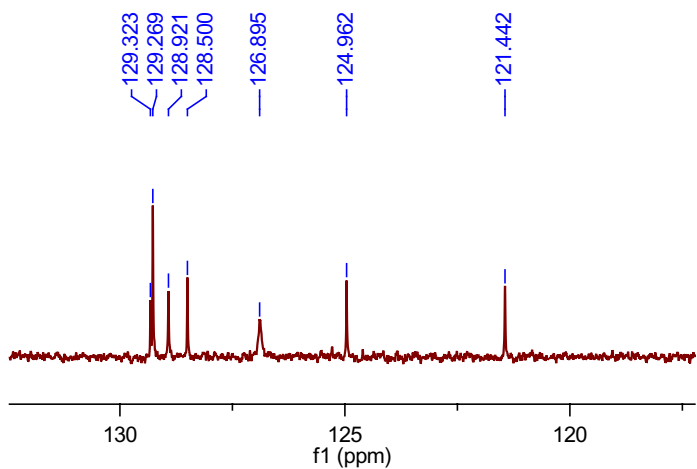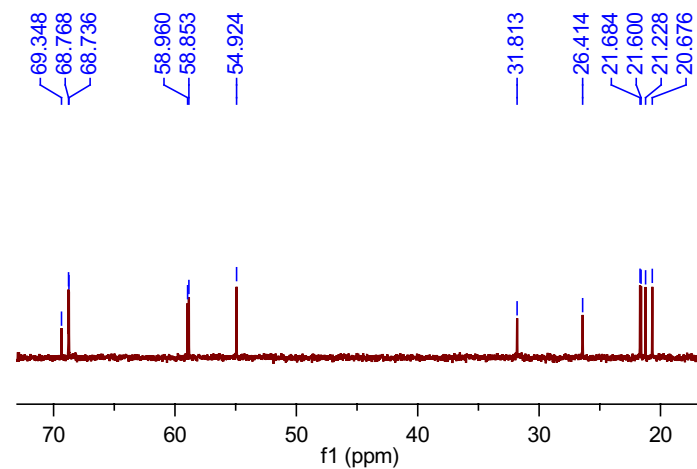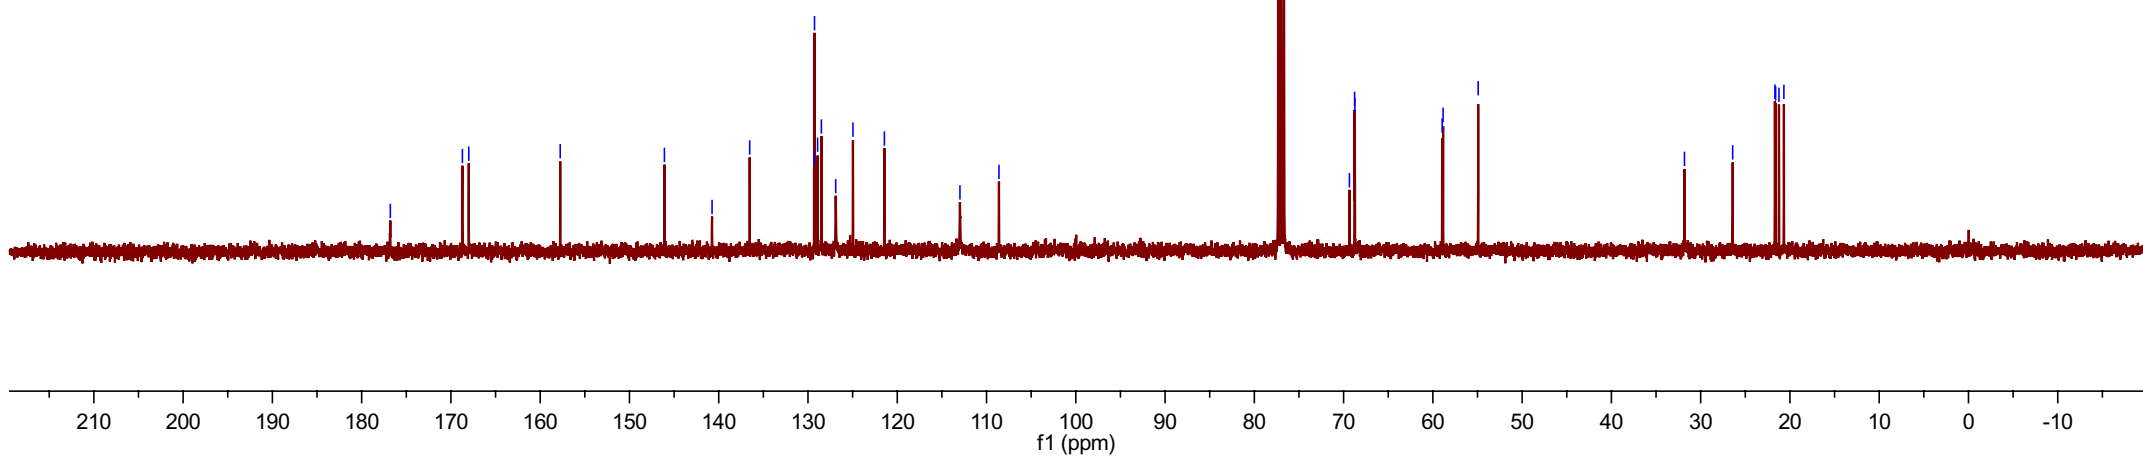

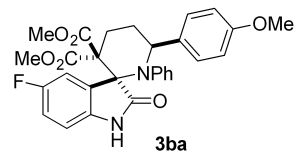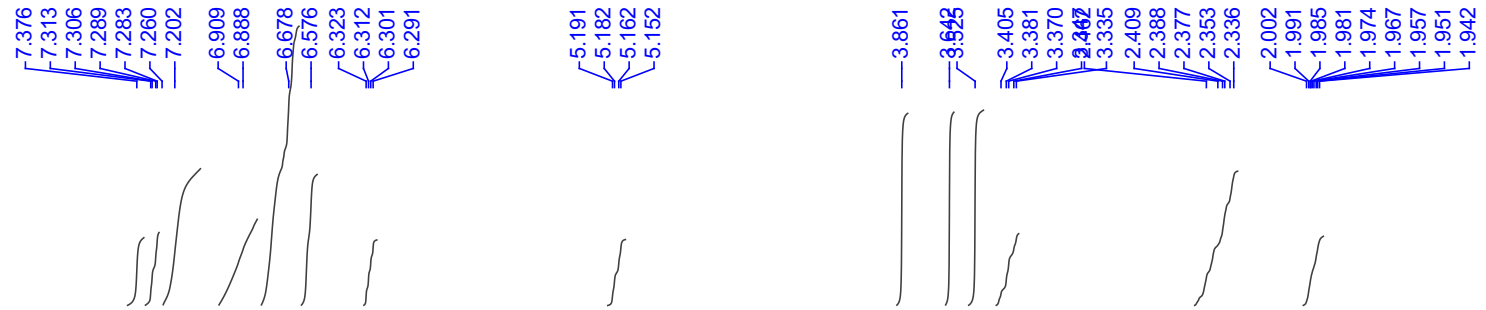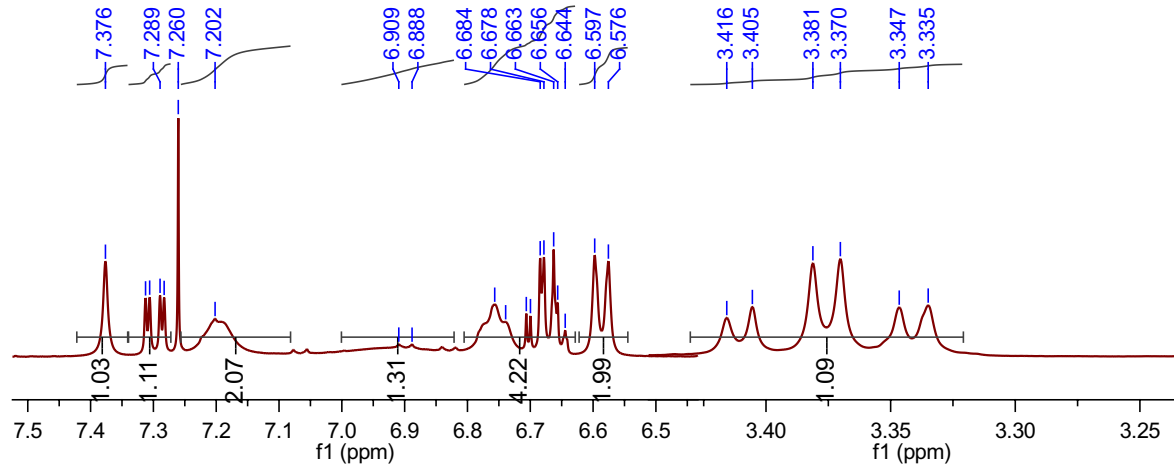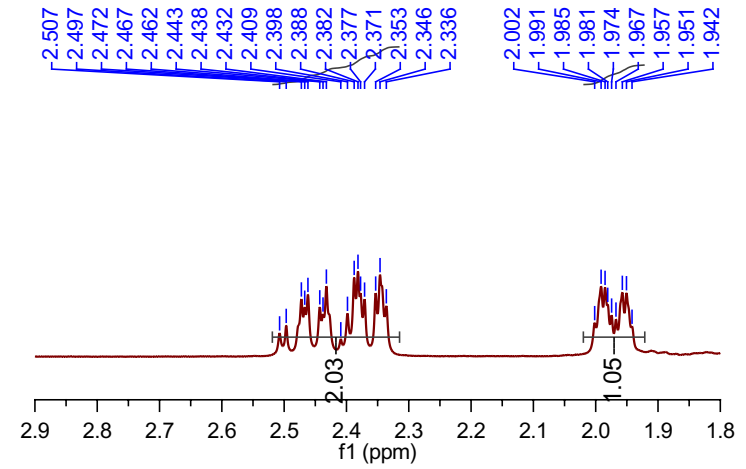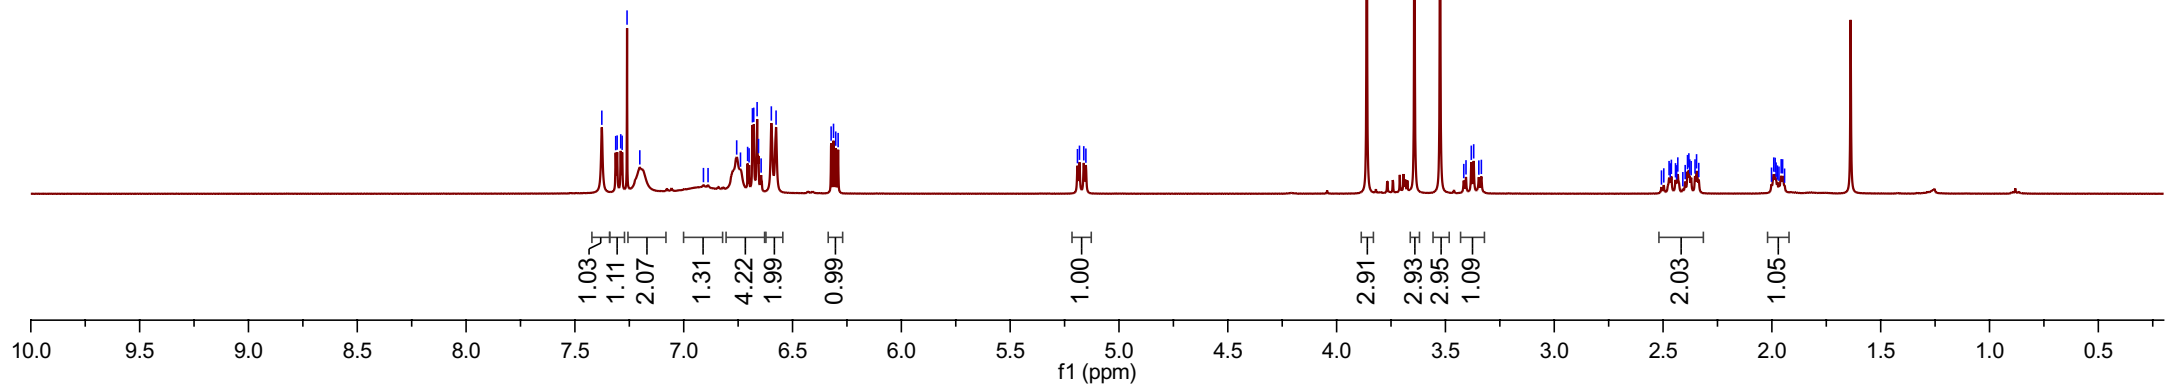

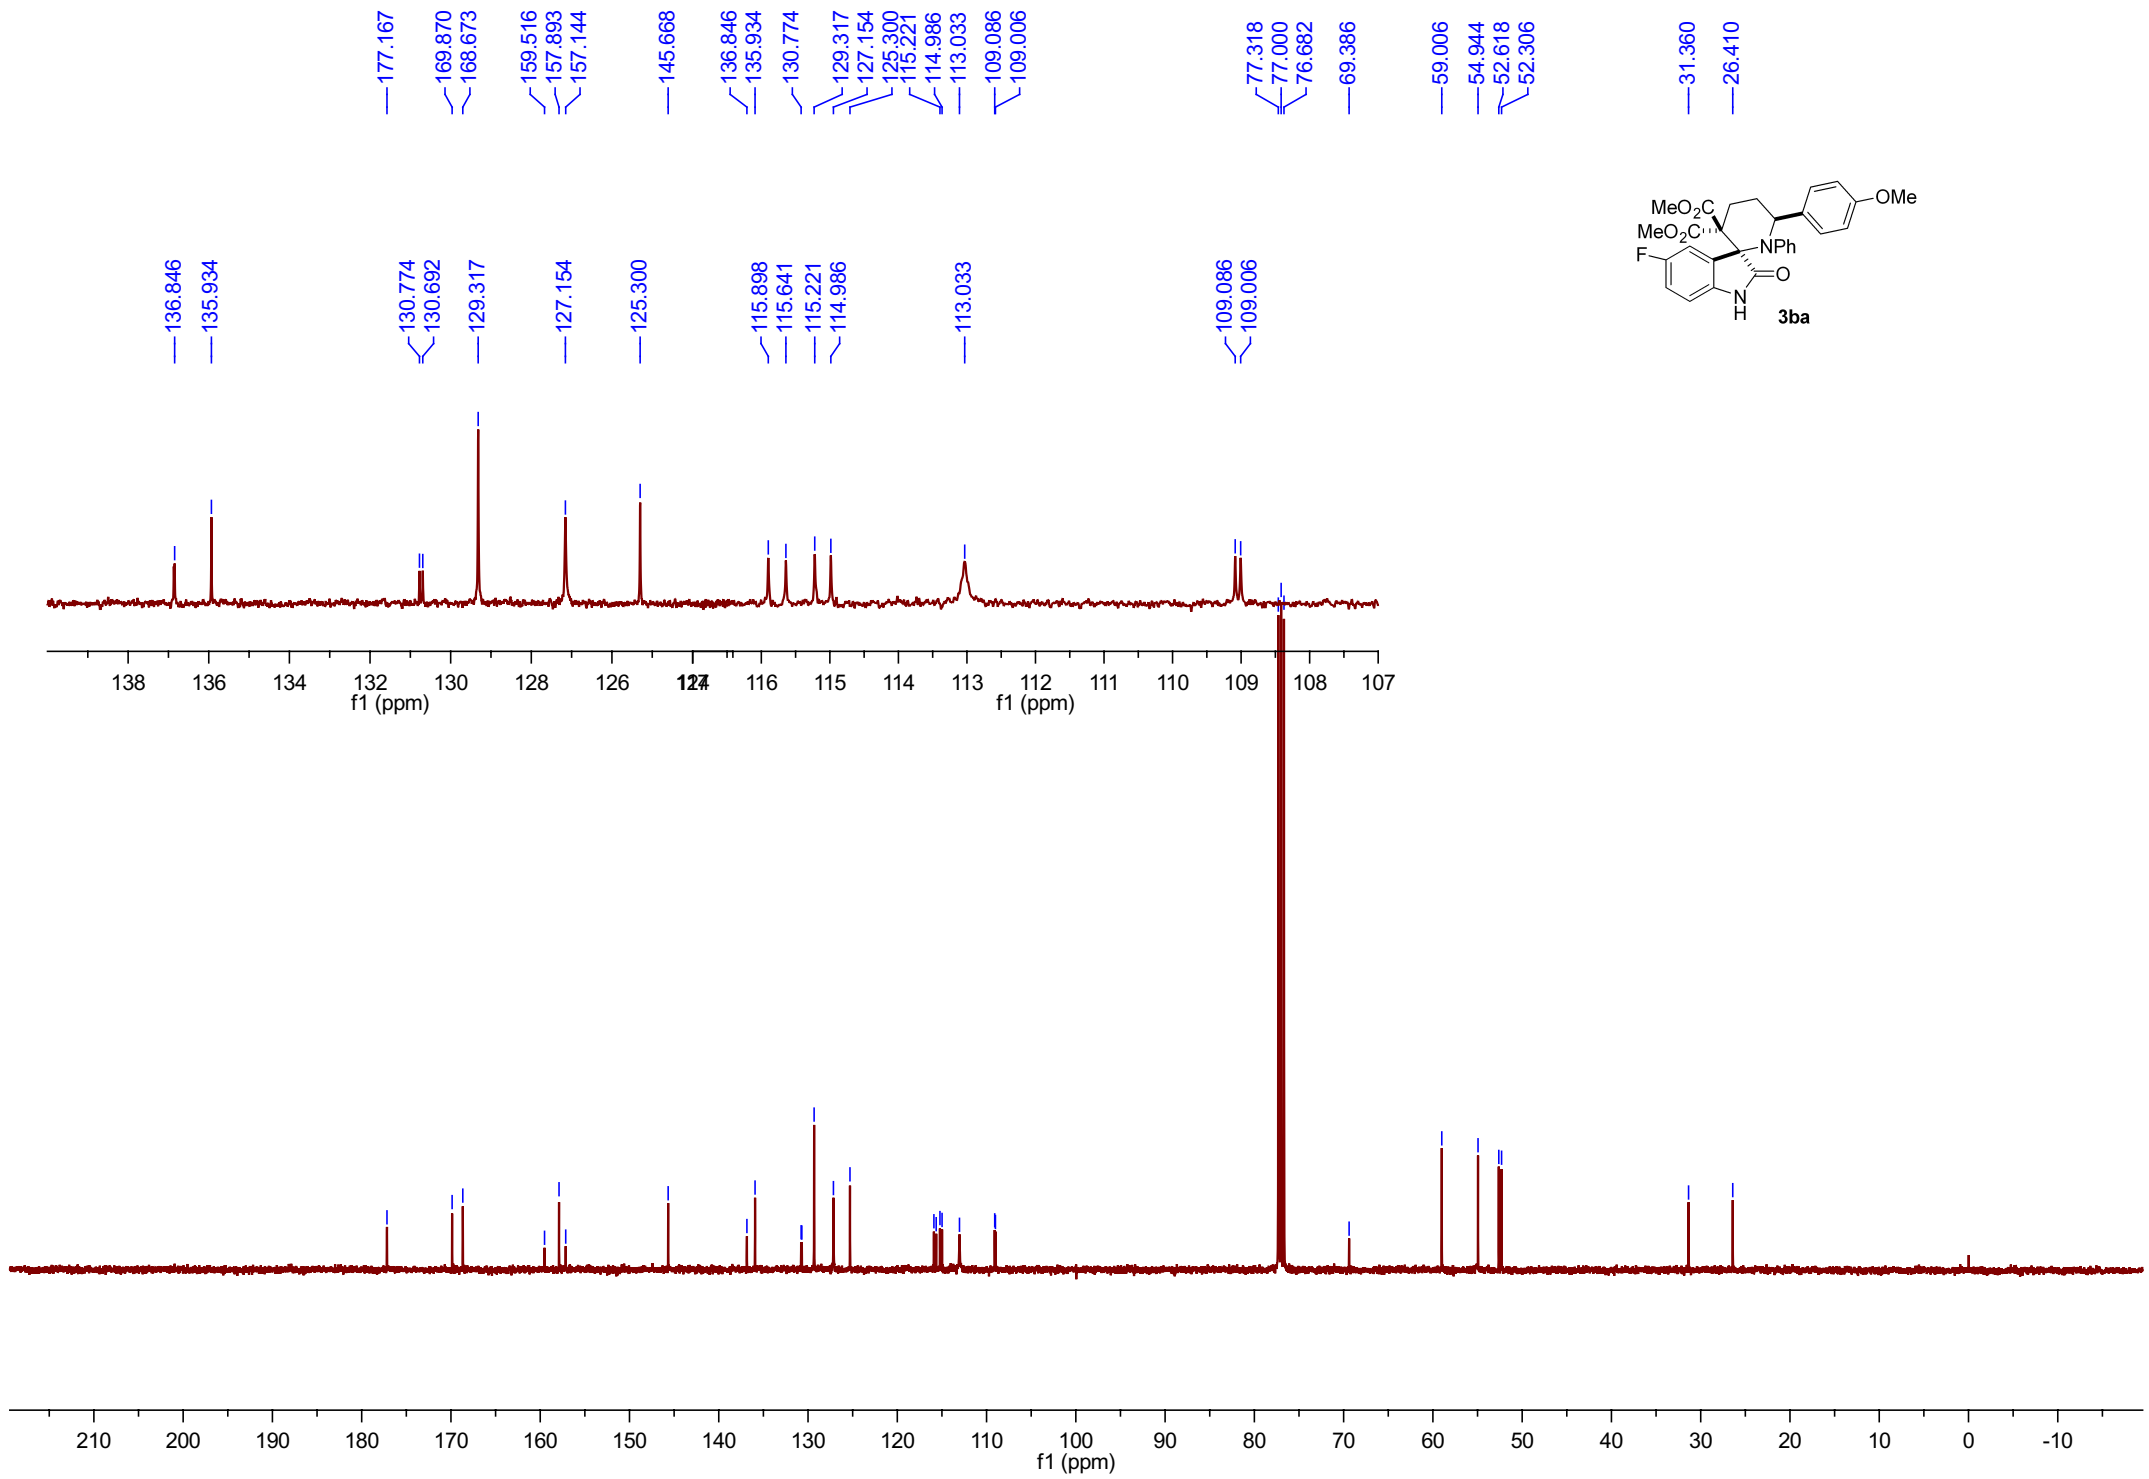



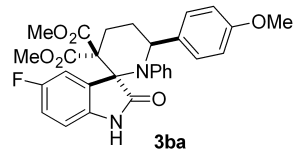

---121.052

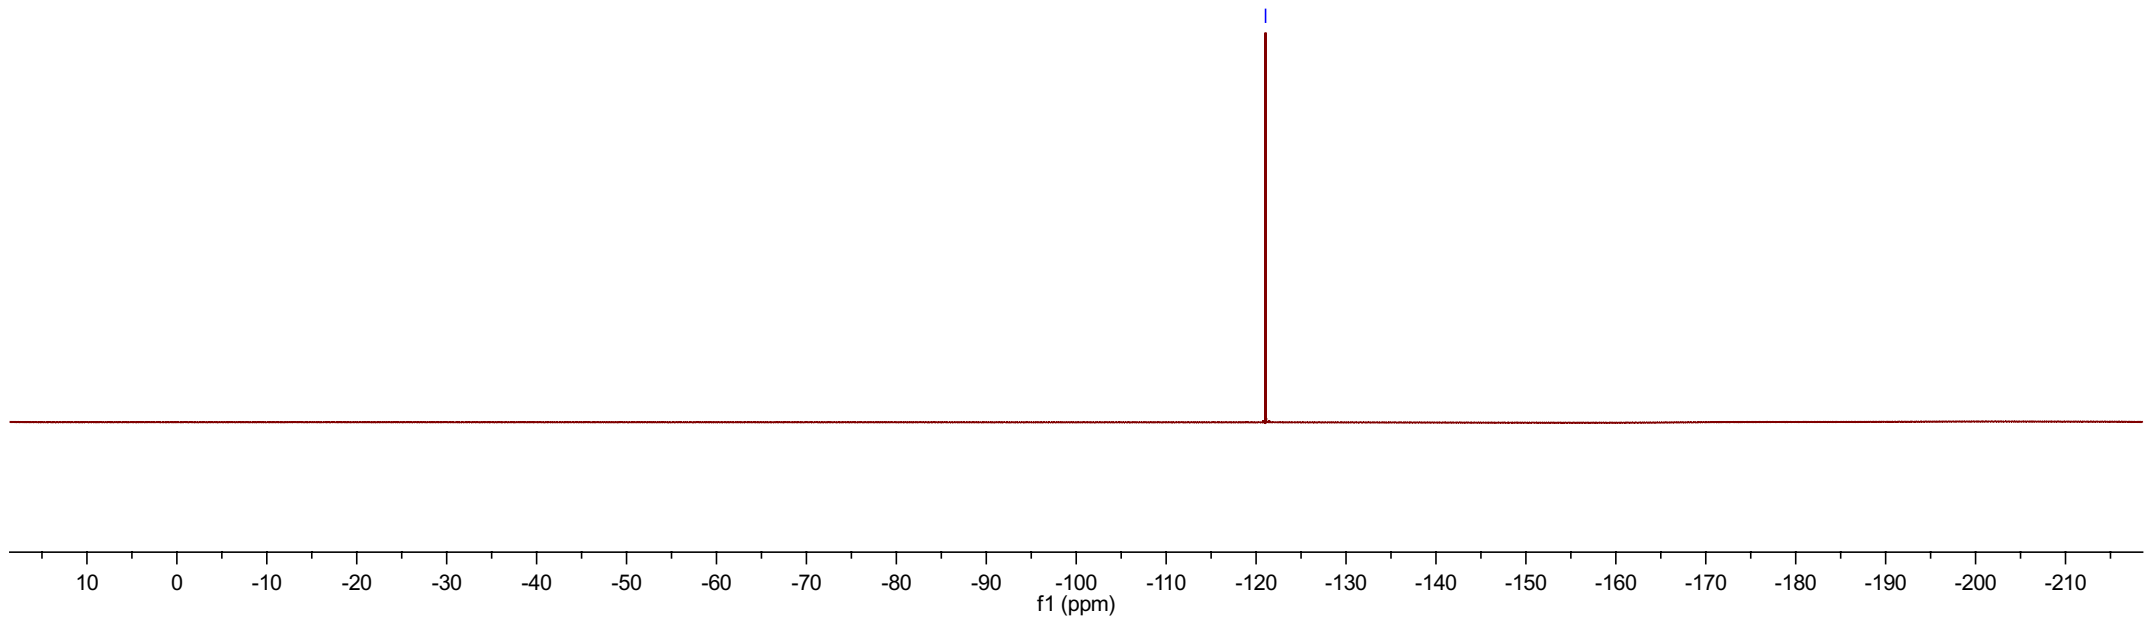

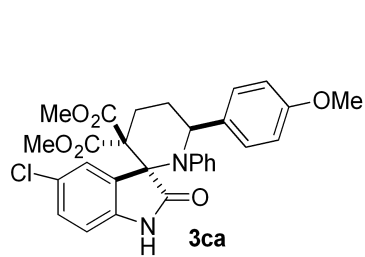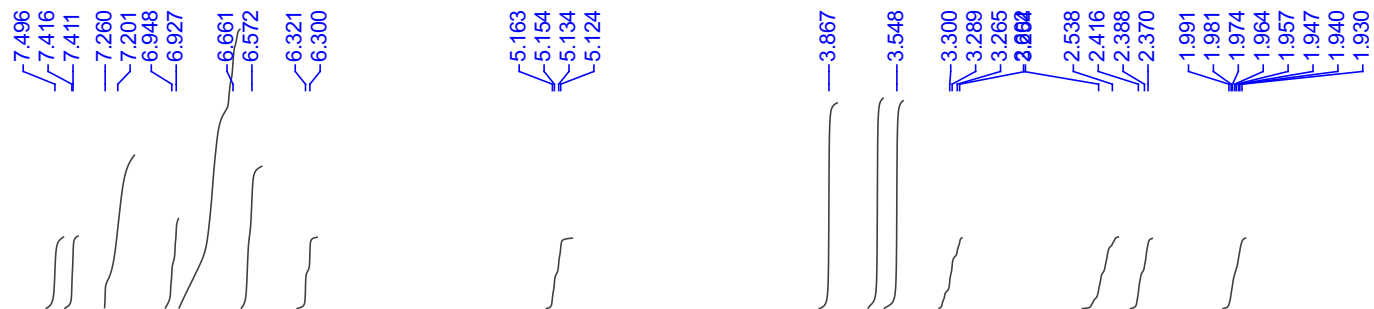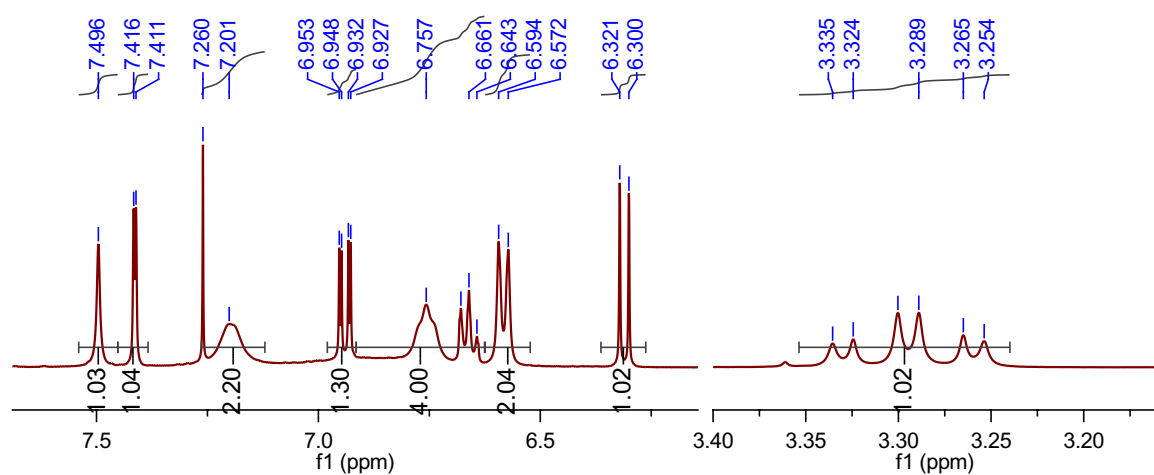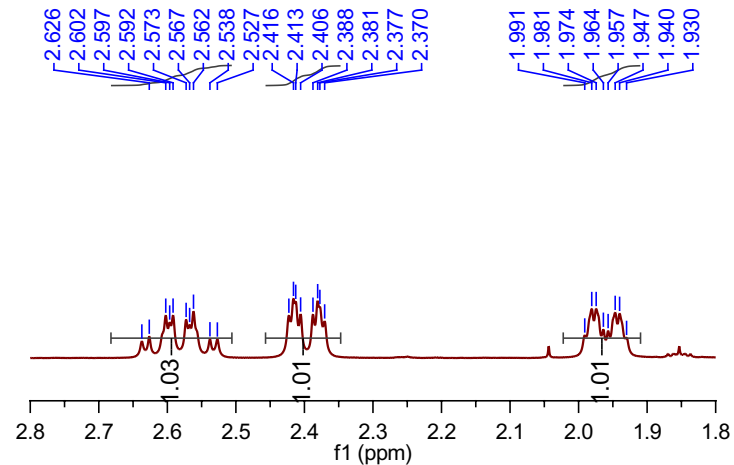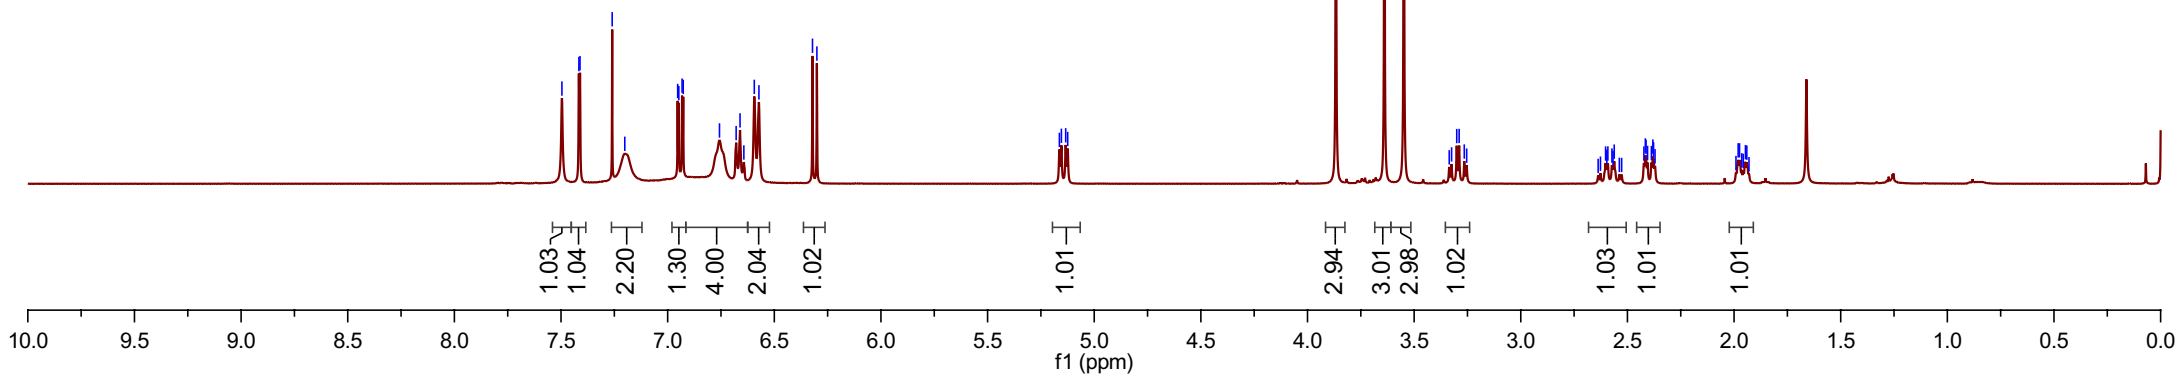

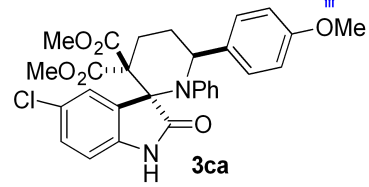

176.972  
169.993  
168.696  
157.887  
145.511  
139.582  
135.878  
130.766  
129.332  
128.588  
127.927  
127.135  
126.763  
125.318  
113.033  
109.668

77.318  
77.000  
76.683  
69.023

58.922  
58.757  
54.939  
52.636  
52.237

31.228  
26.487

135.878

130.766

129.332

128.588

127.927

127.135

126.763

125.318

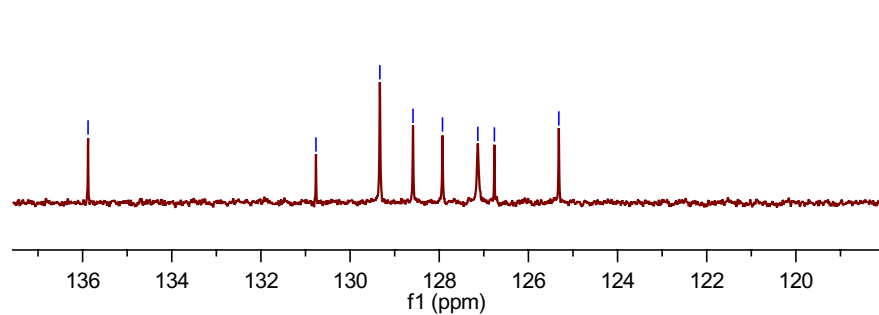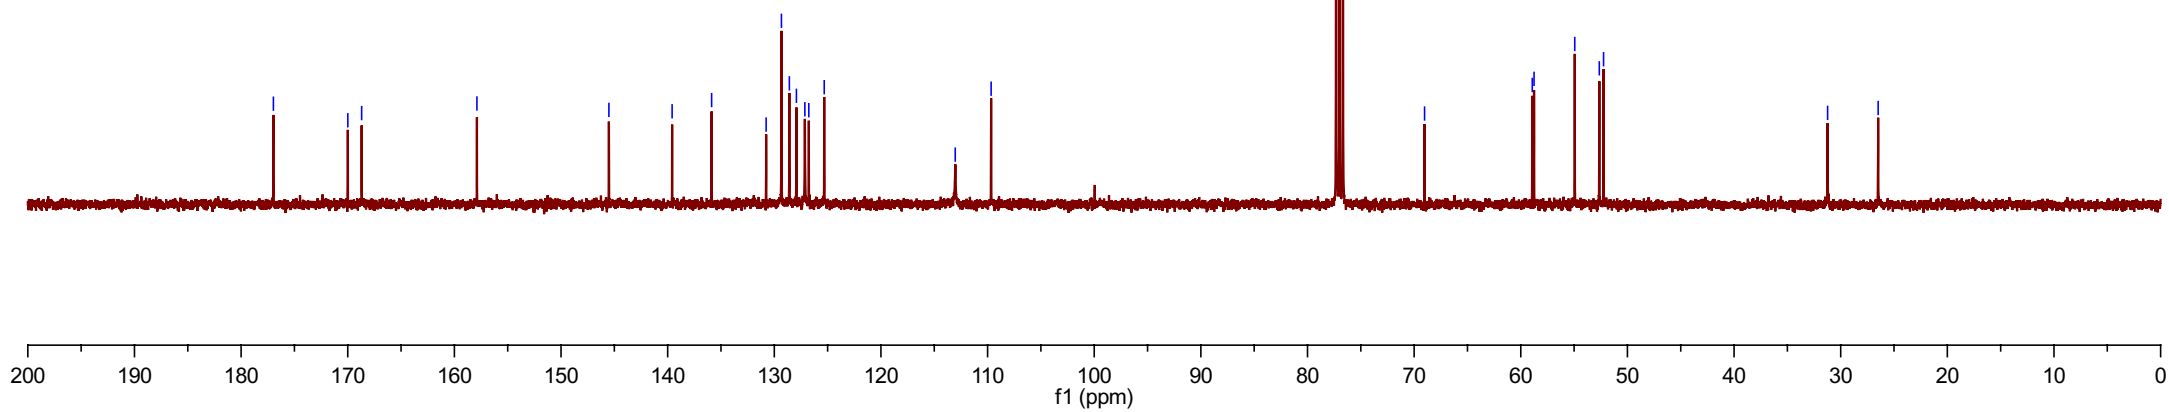

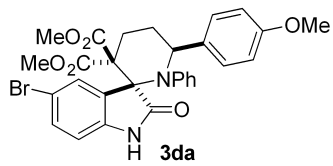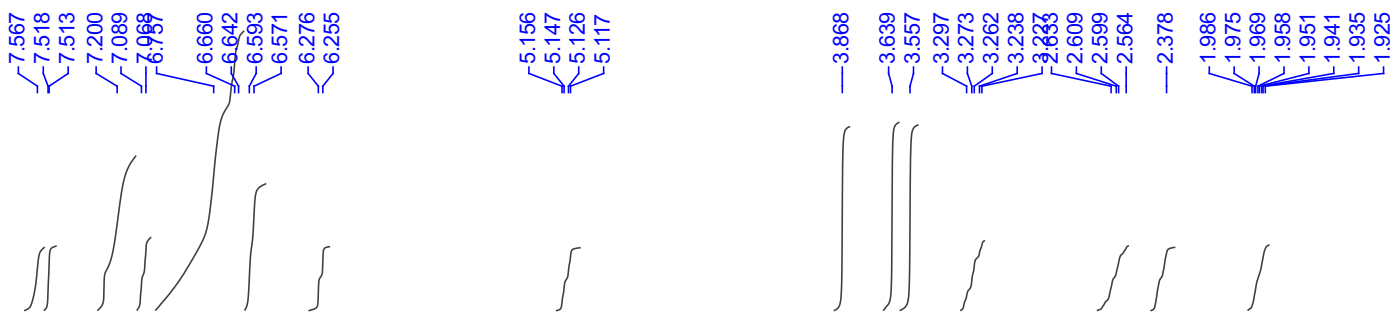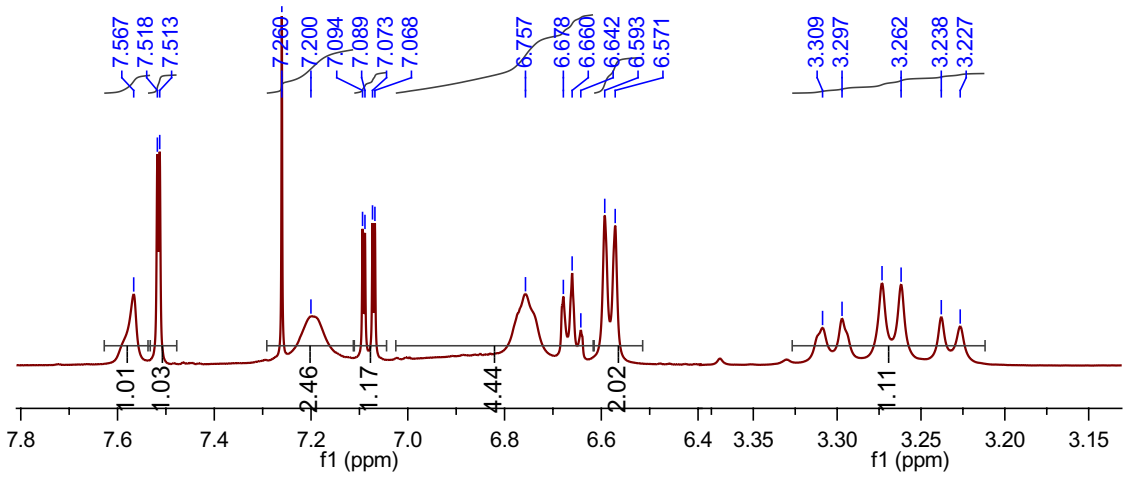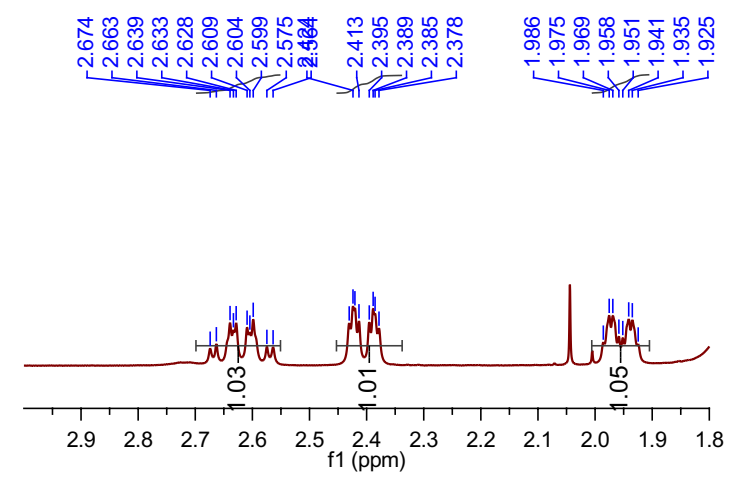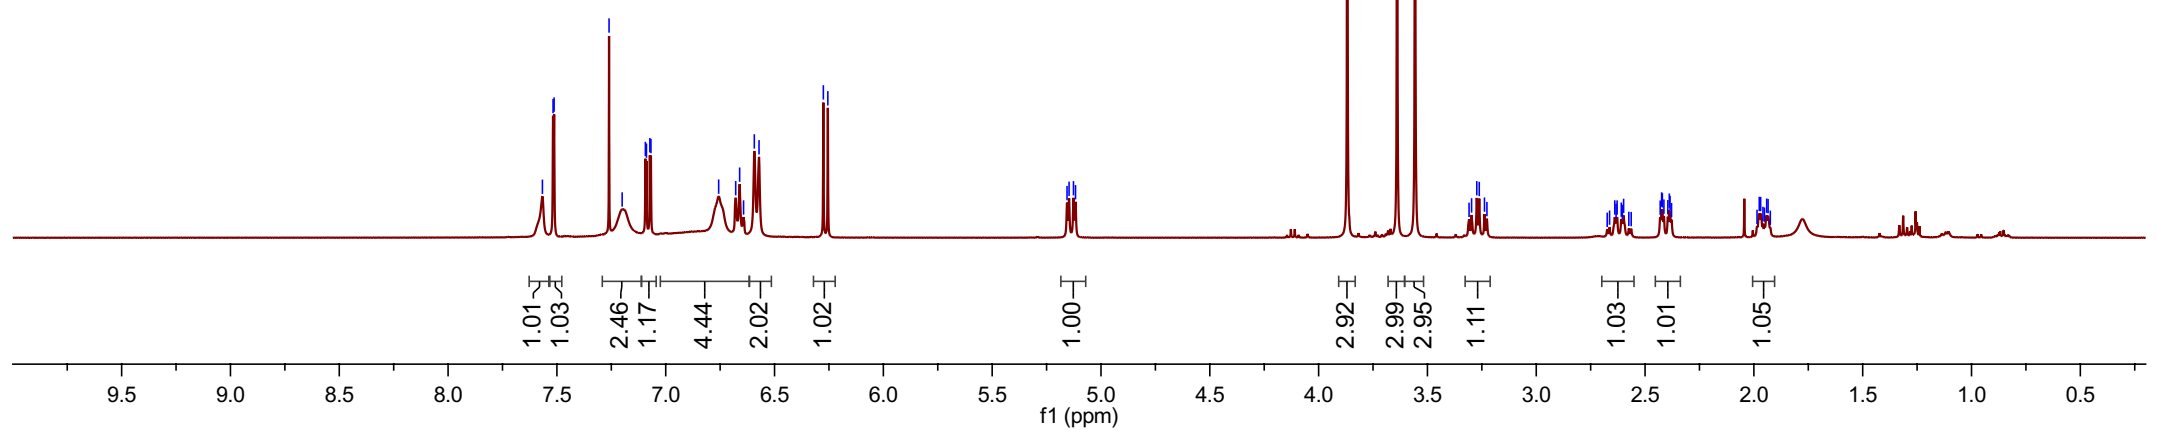

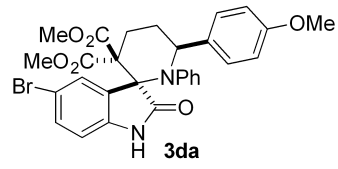

176.844  
170.020  
168.709  
157.874  
145.457  
140.114  
135.866  
131.442  
130.594  
129.333  
127.117  
125.317  
113.969  
113.026  
110.190  
77.317  
77.000  
76.682  
68.923  
58.869  
58.682  
54.937  
52.636  
52.211  
31.195  
26.502

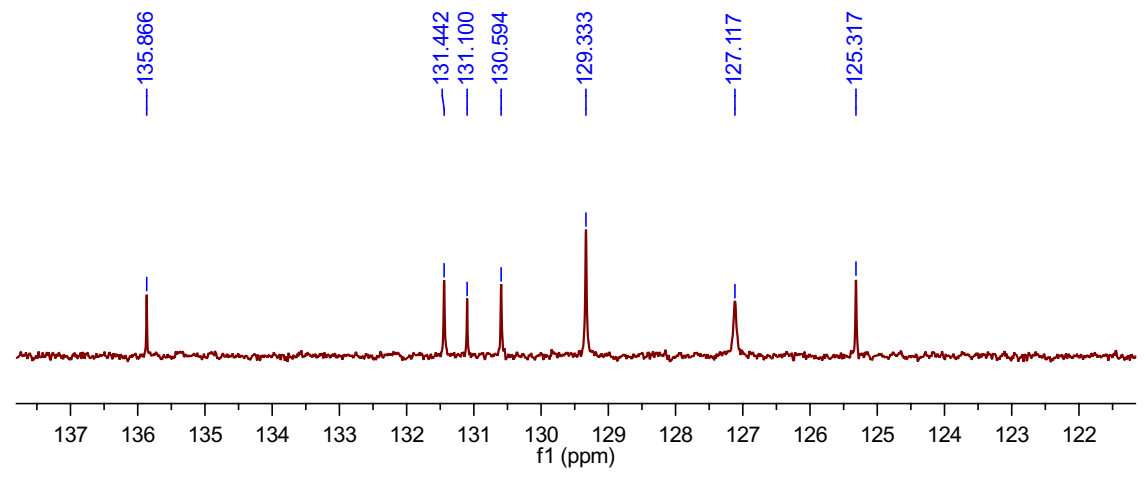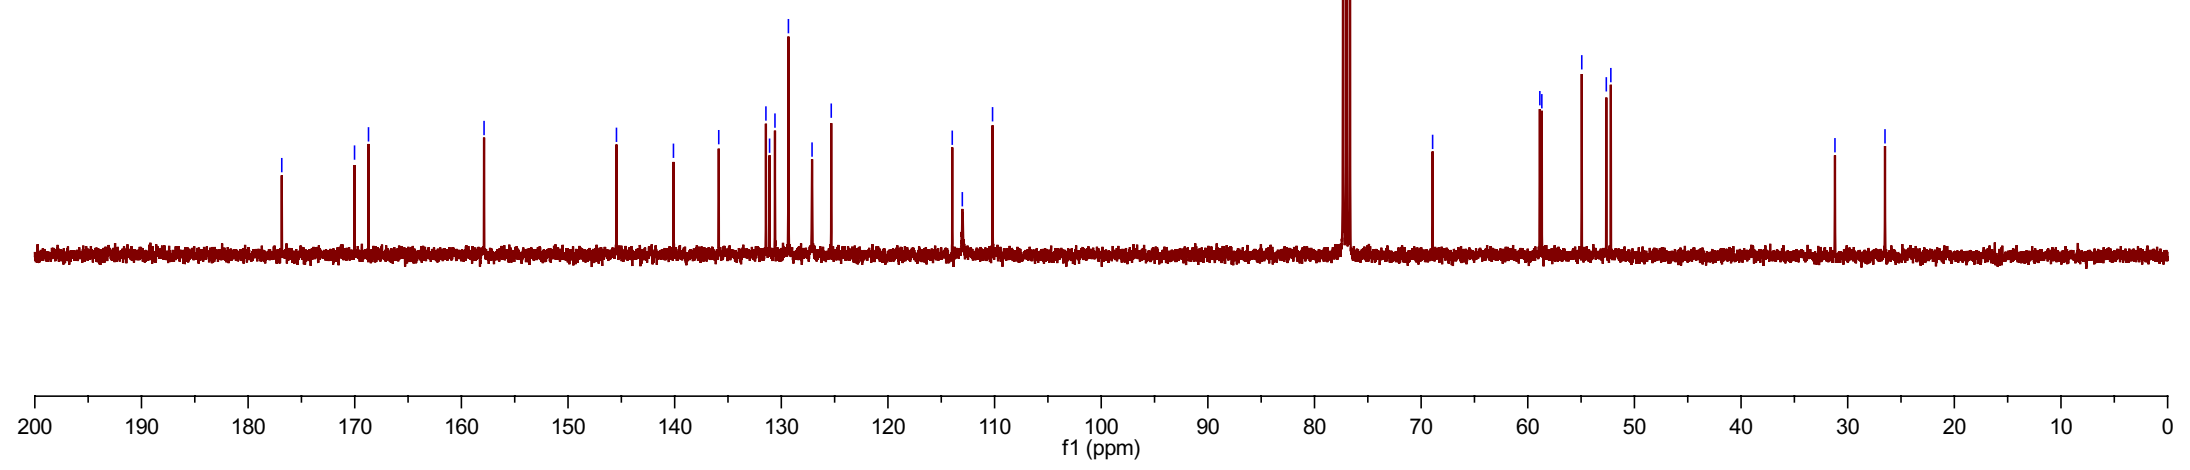

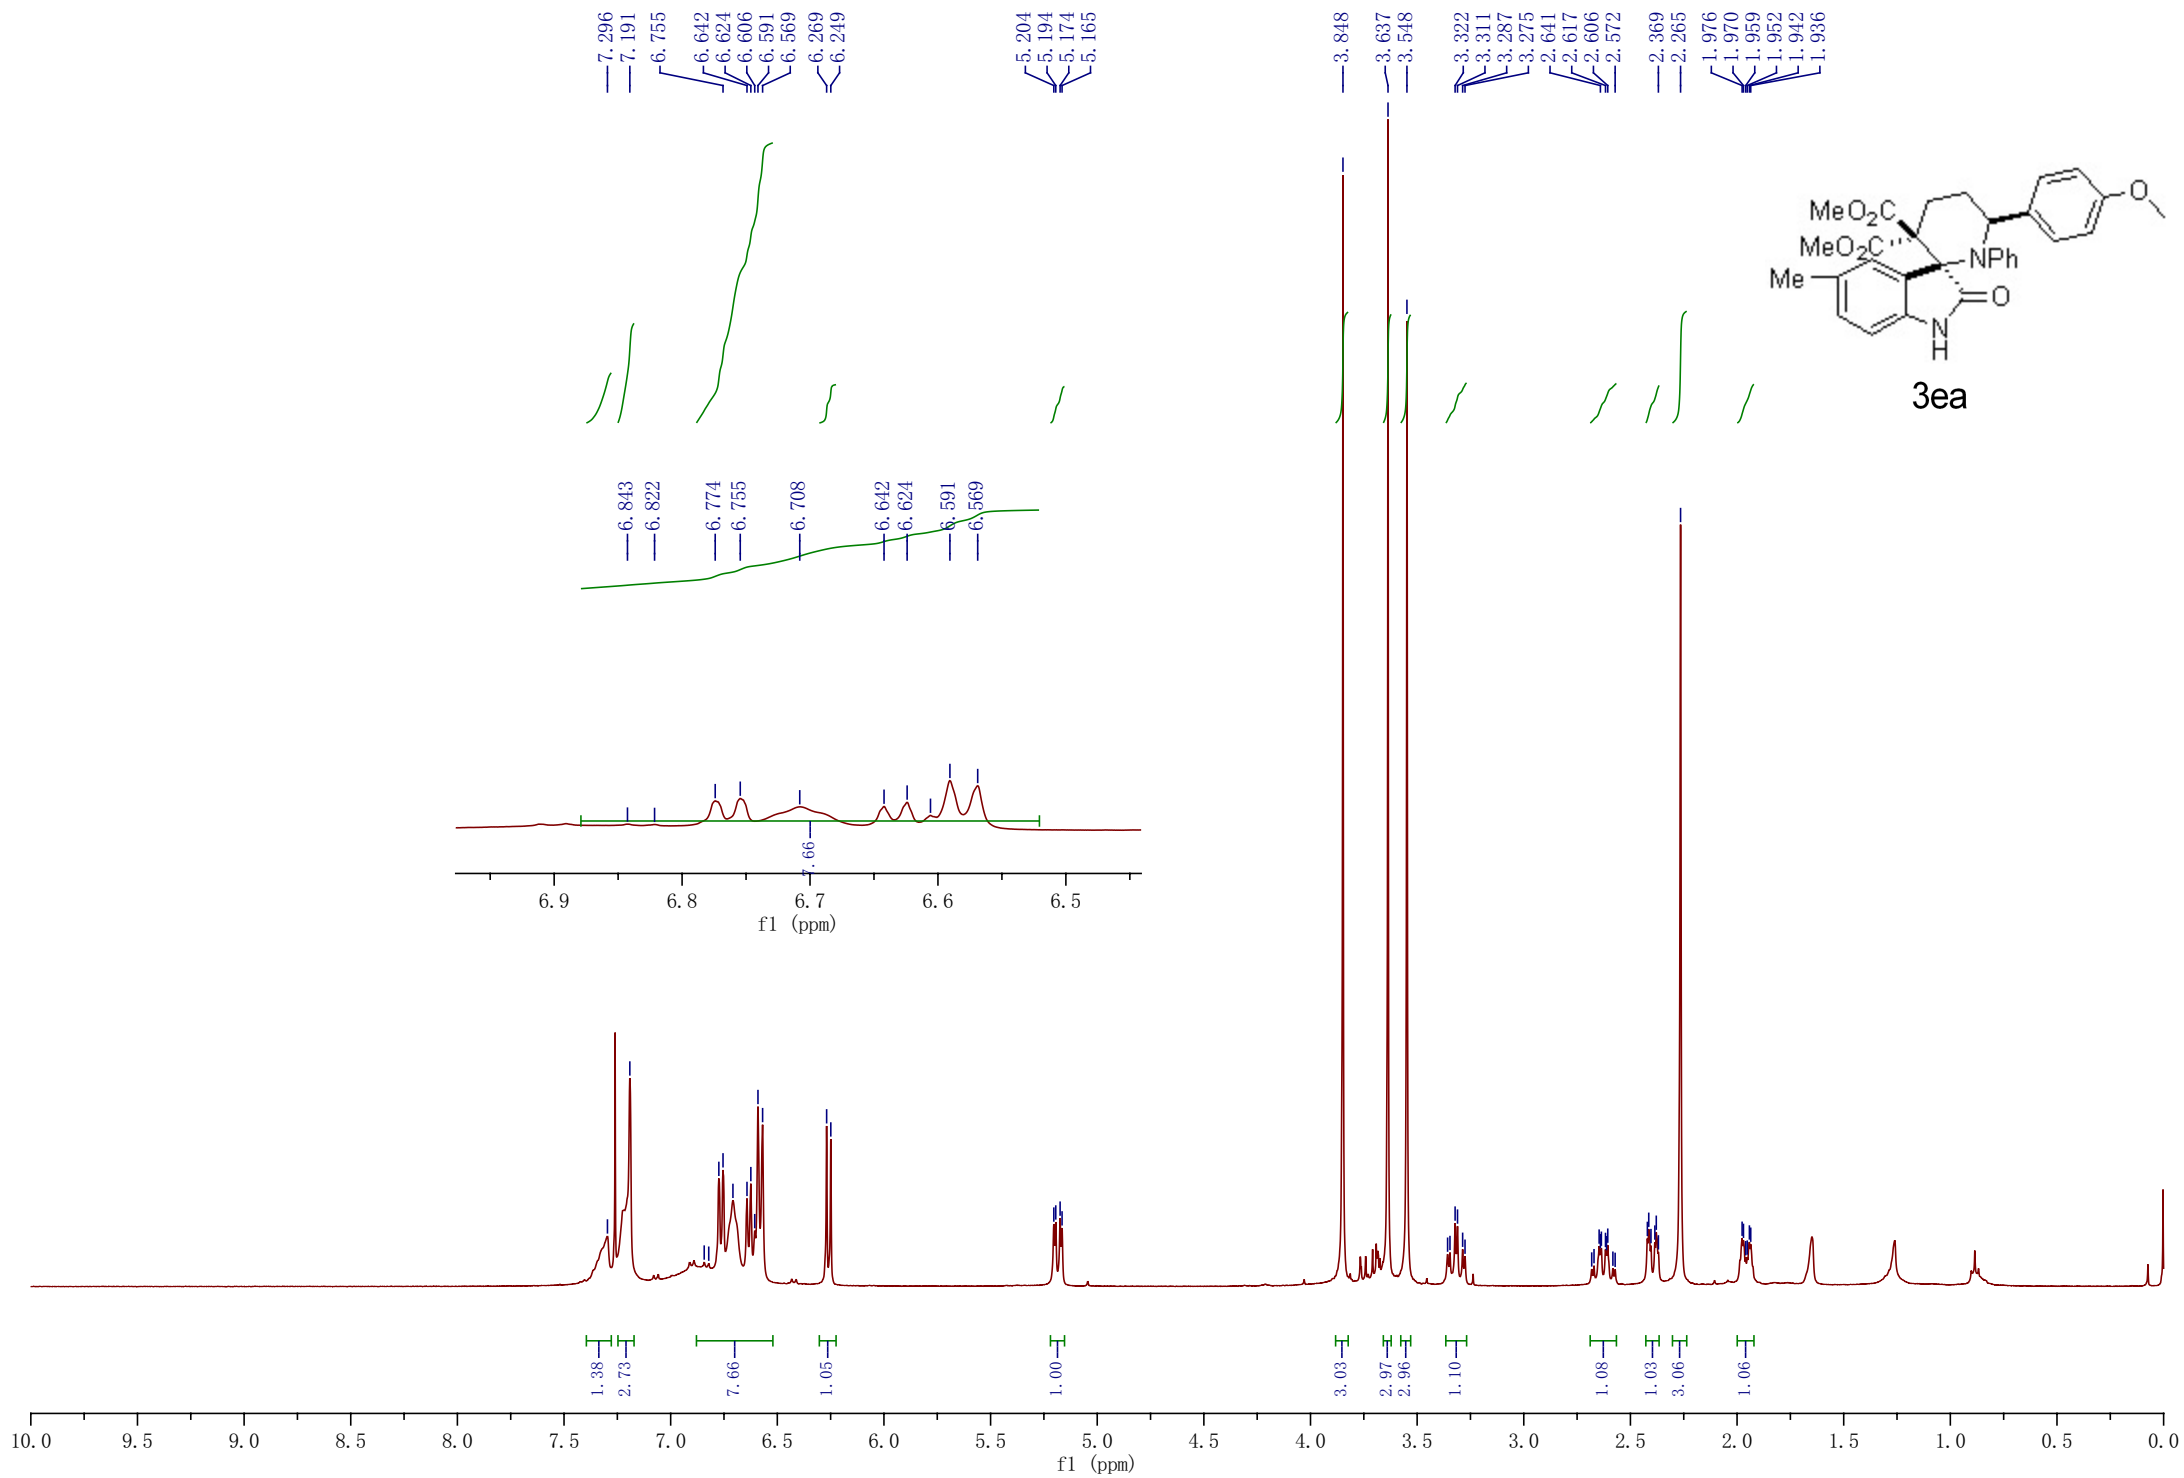

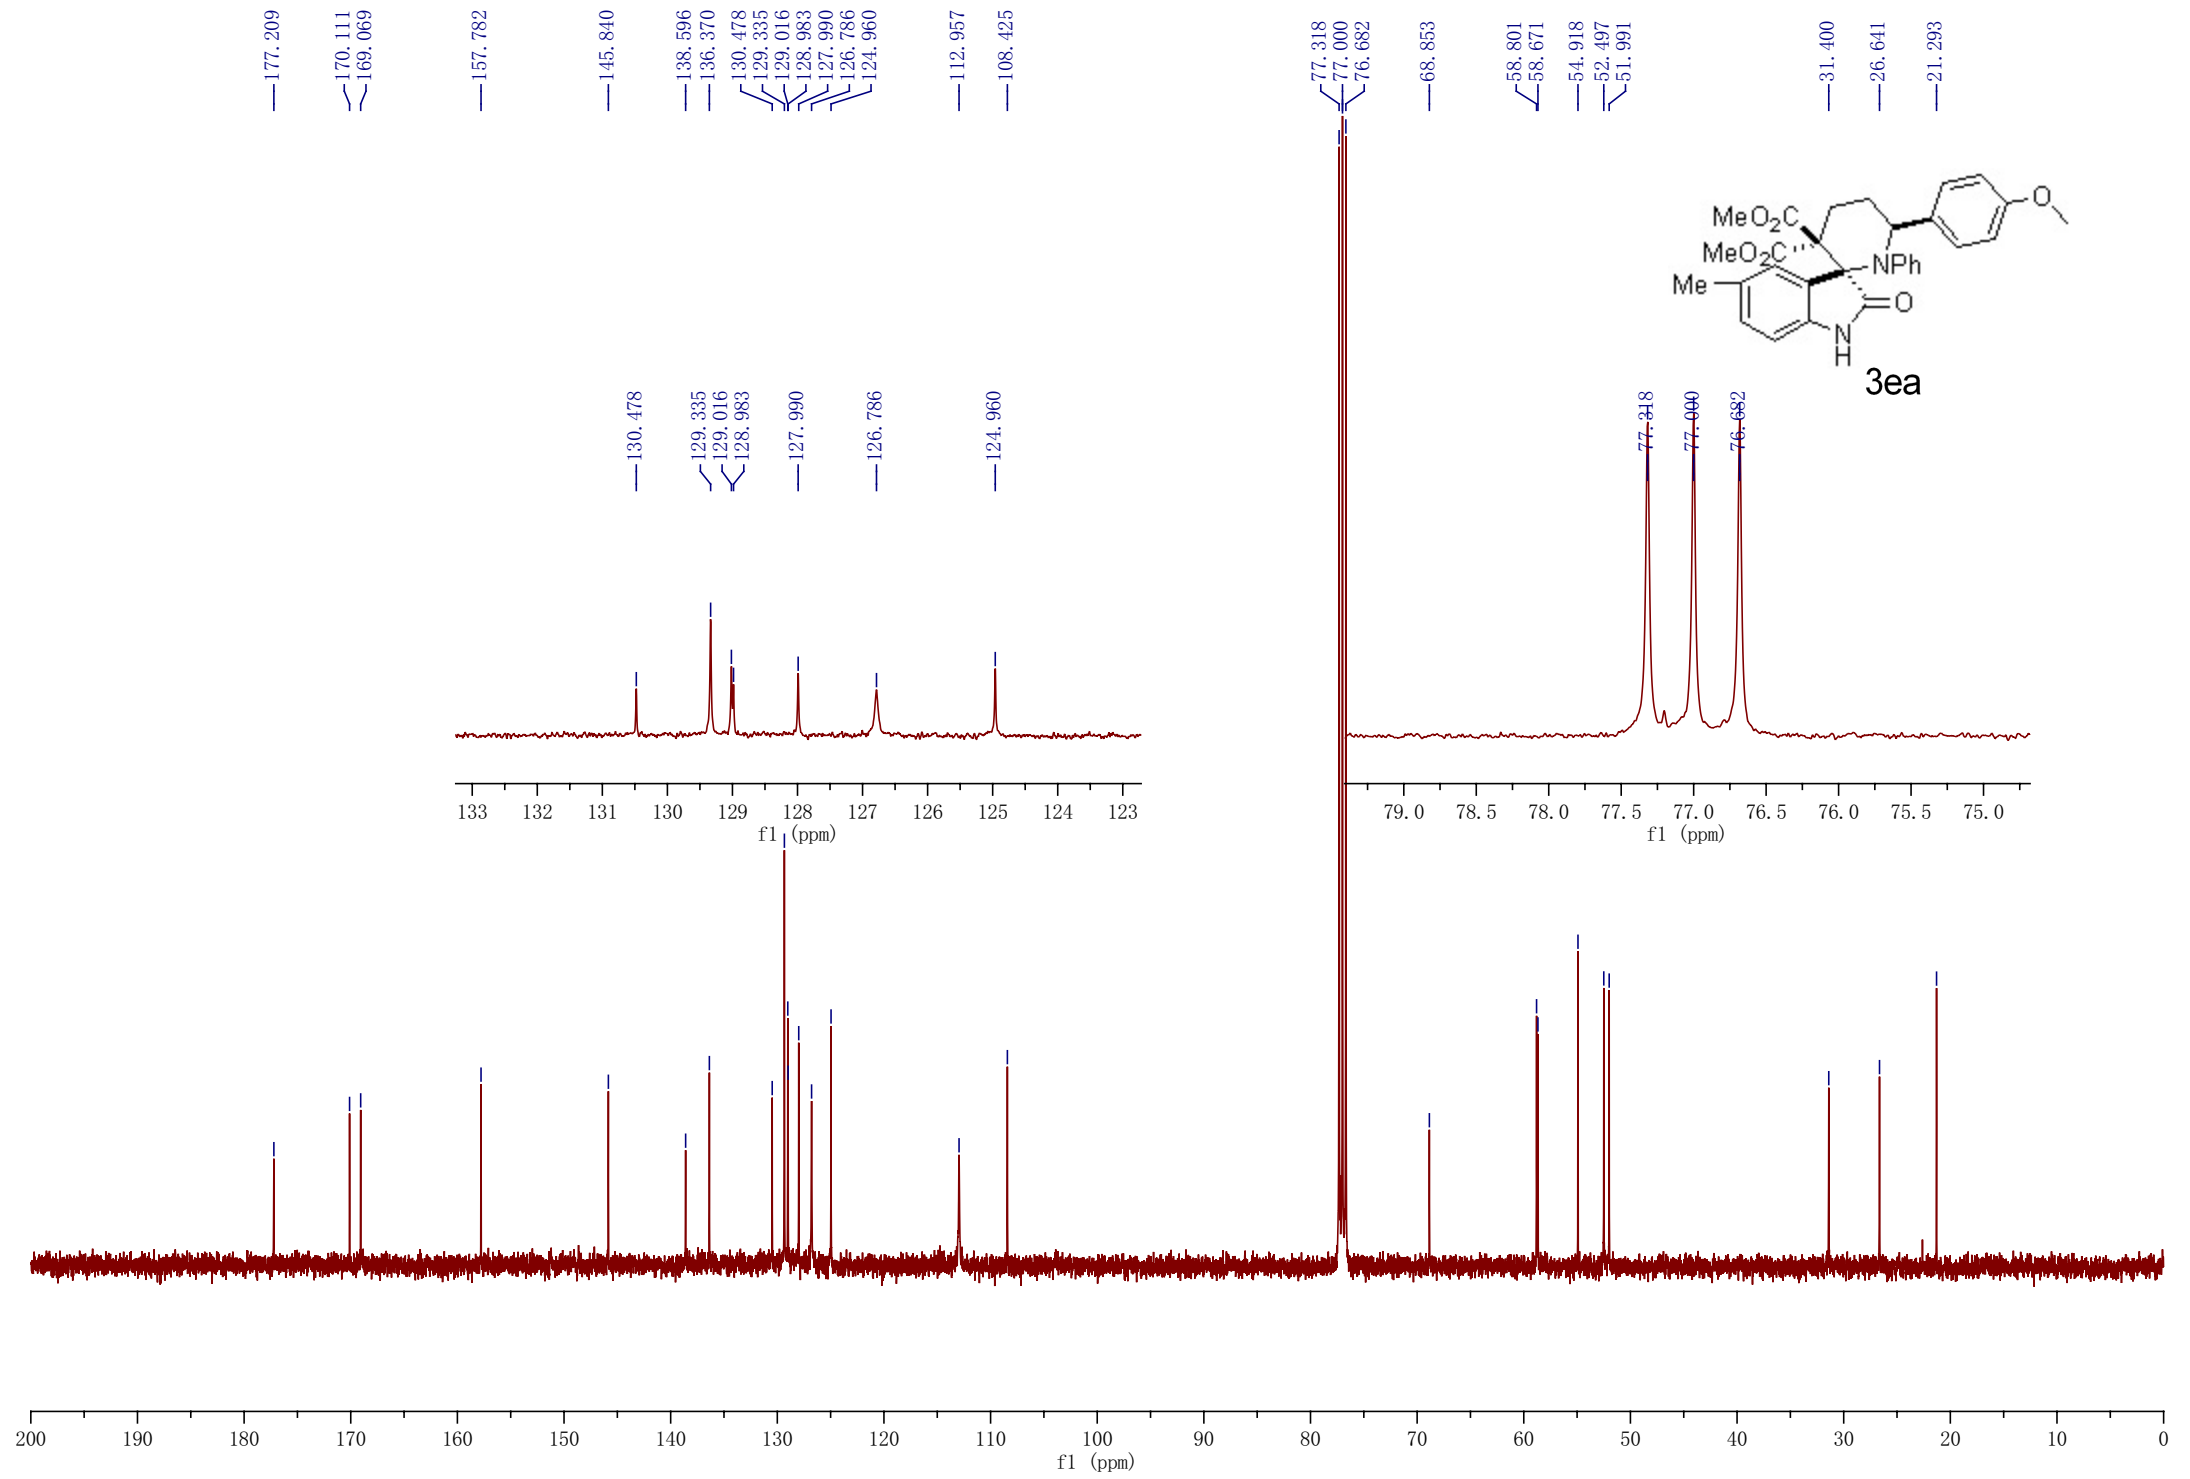

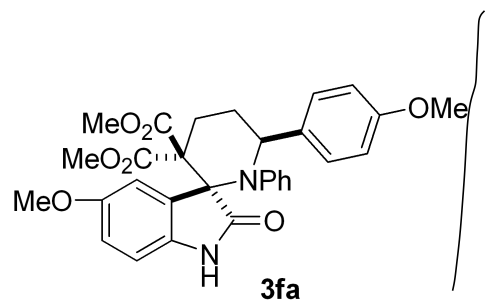

7.261  
7.241  
7.214  
7.200  
7.154  
7.148  
6.907  
6.661  
6.572  
6.497  
6.284  
6.263  
5.210  
5.201  
5.181  
5.171  
3.858  
3.748  
3.641  
3.526  
3.416  
3.391  
3.380  
3.356  
3.345  
2.498  
2.468  
2.433  
2.376  
2.348  
2.330  
1.994  
1.984  
1.977  
1.967  
1.960  
1.950  
1.943  
1.933

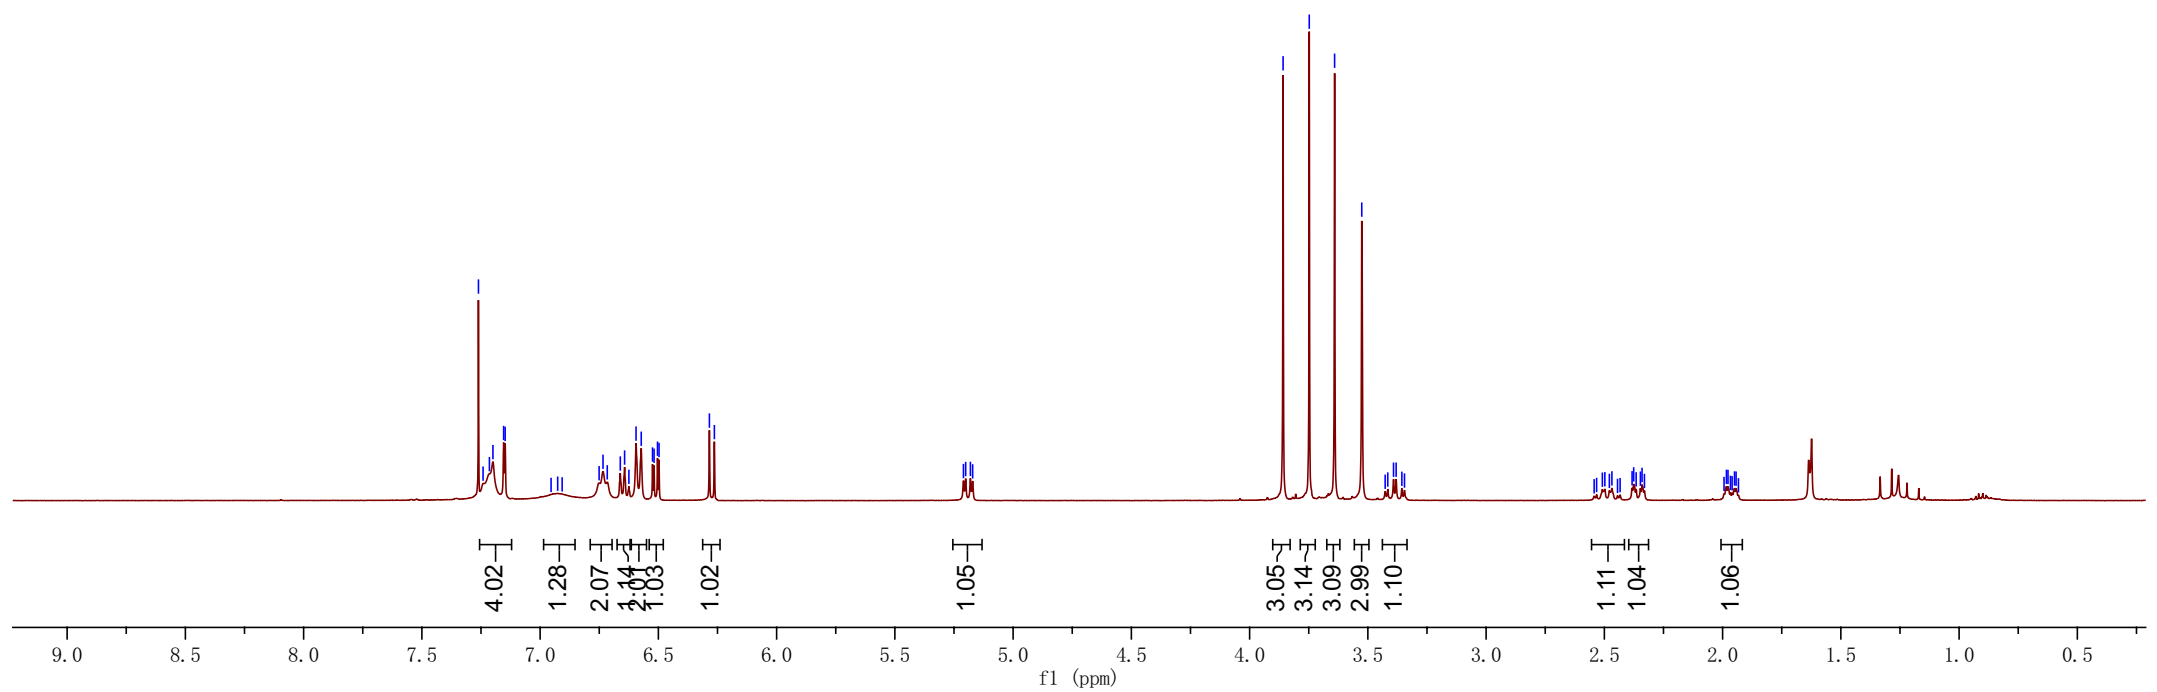



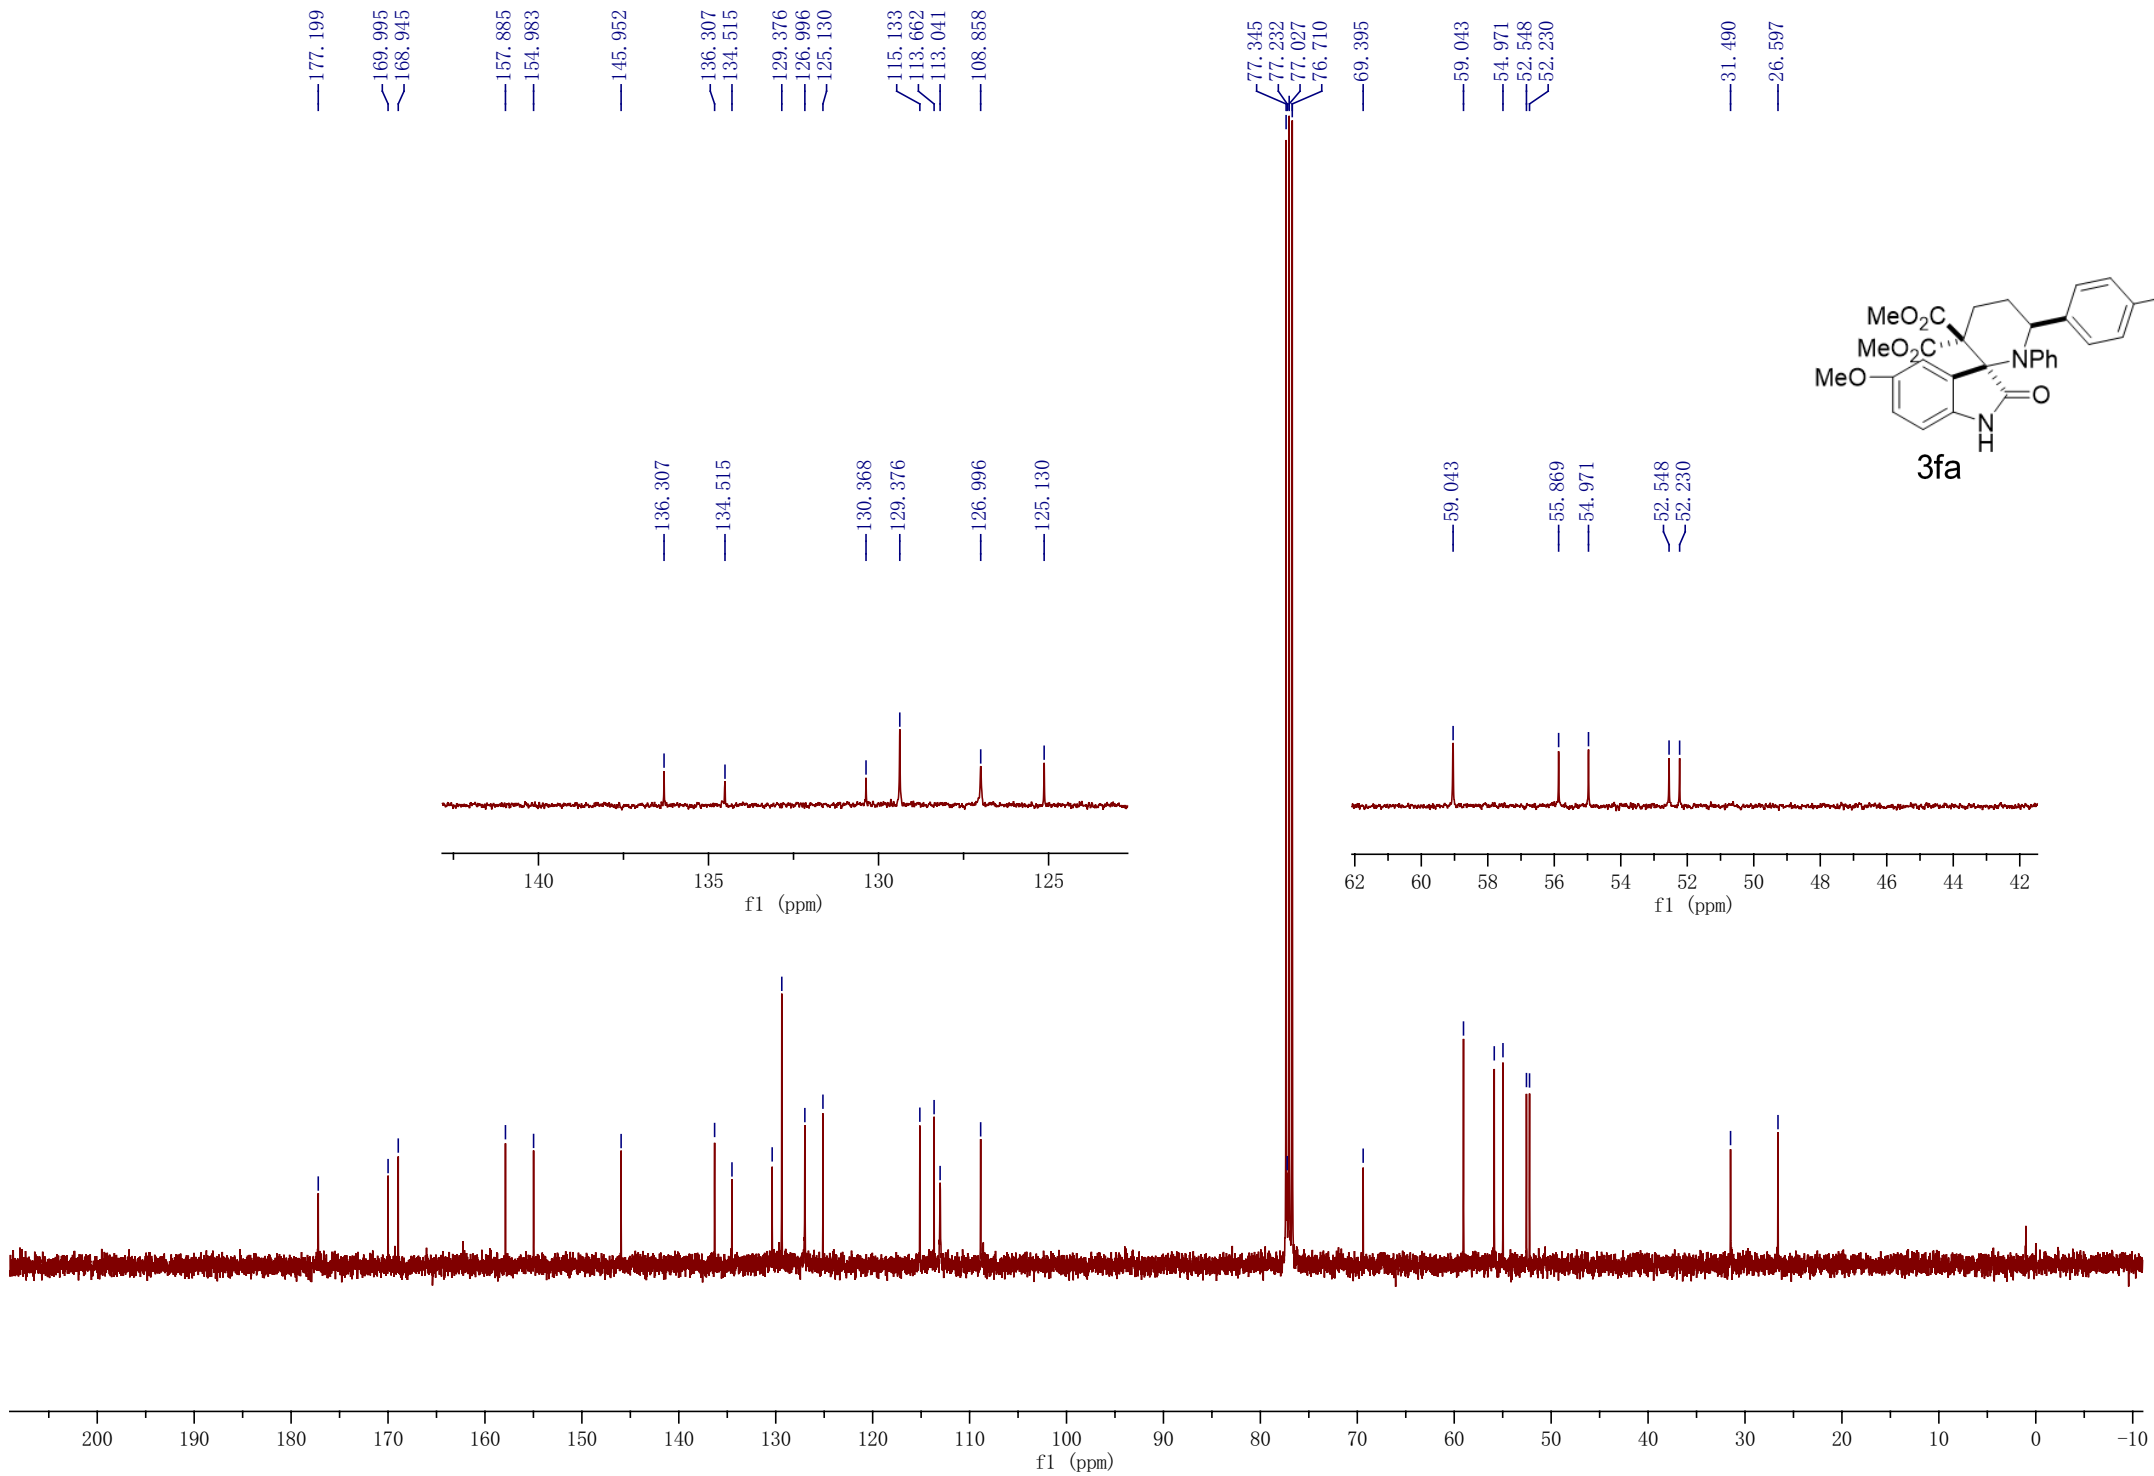

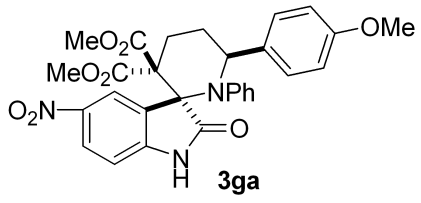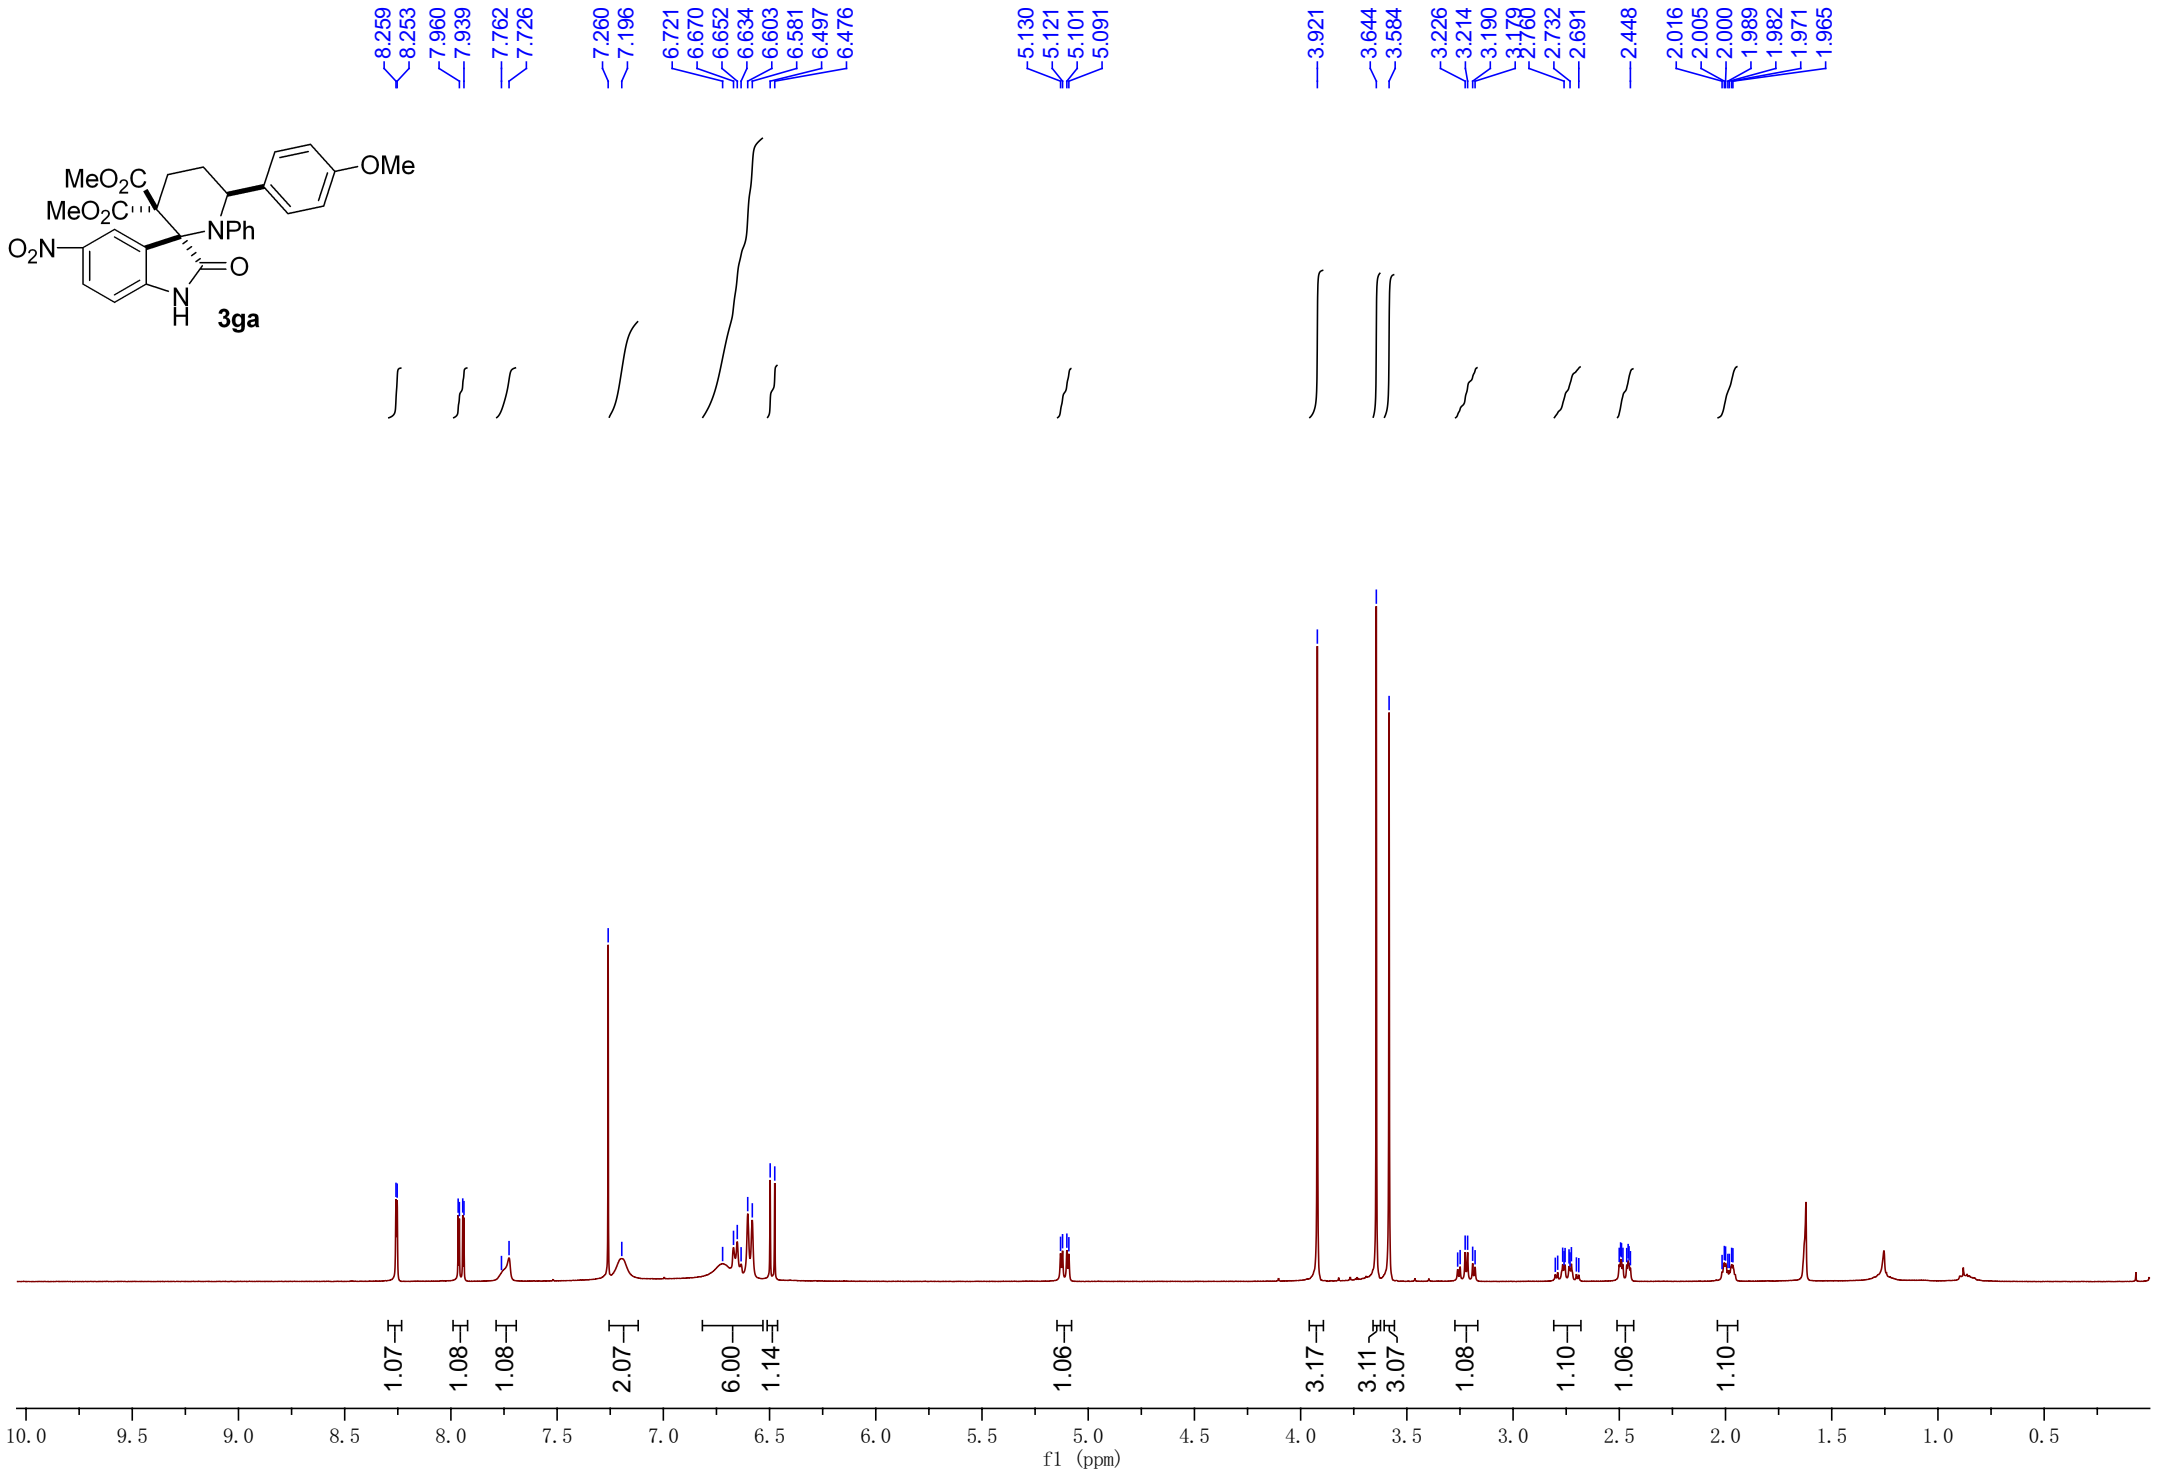

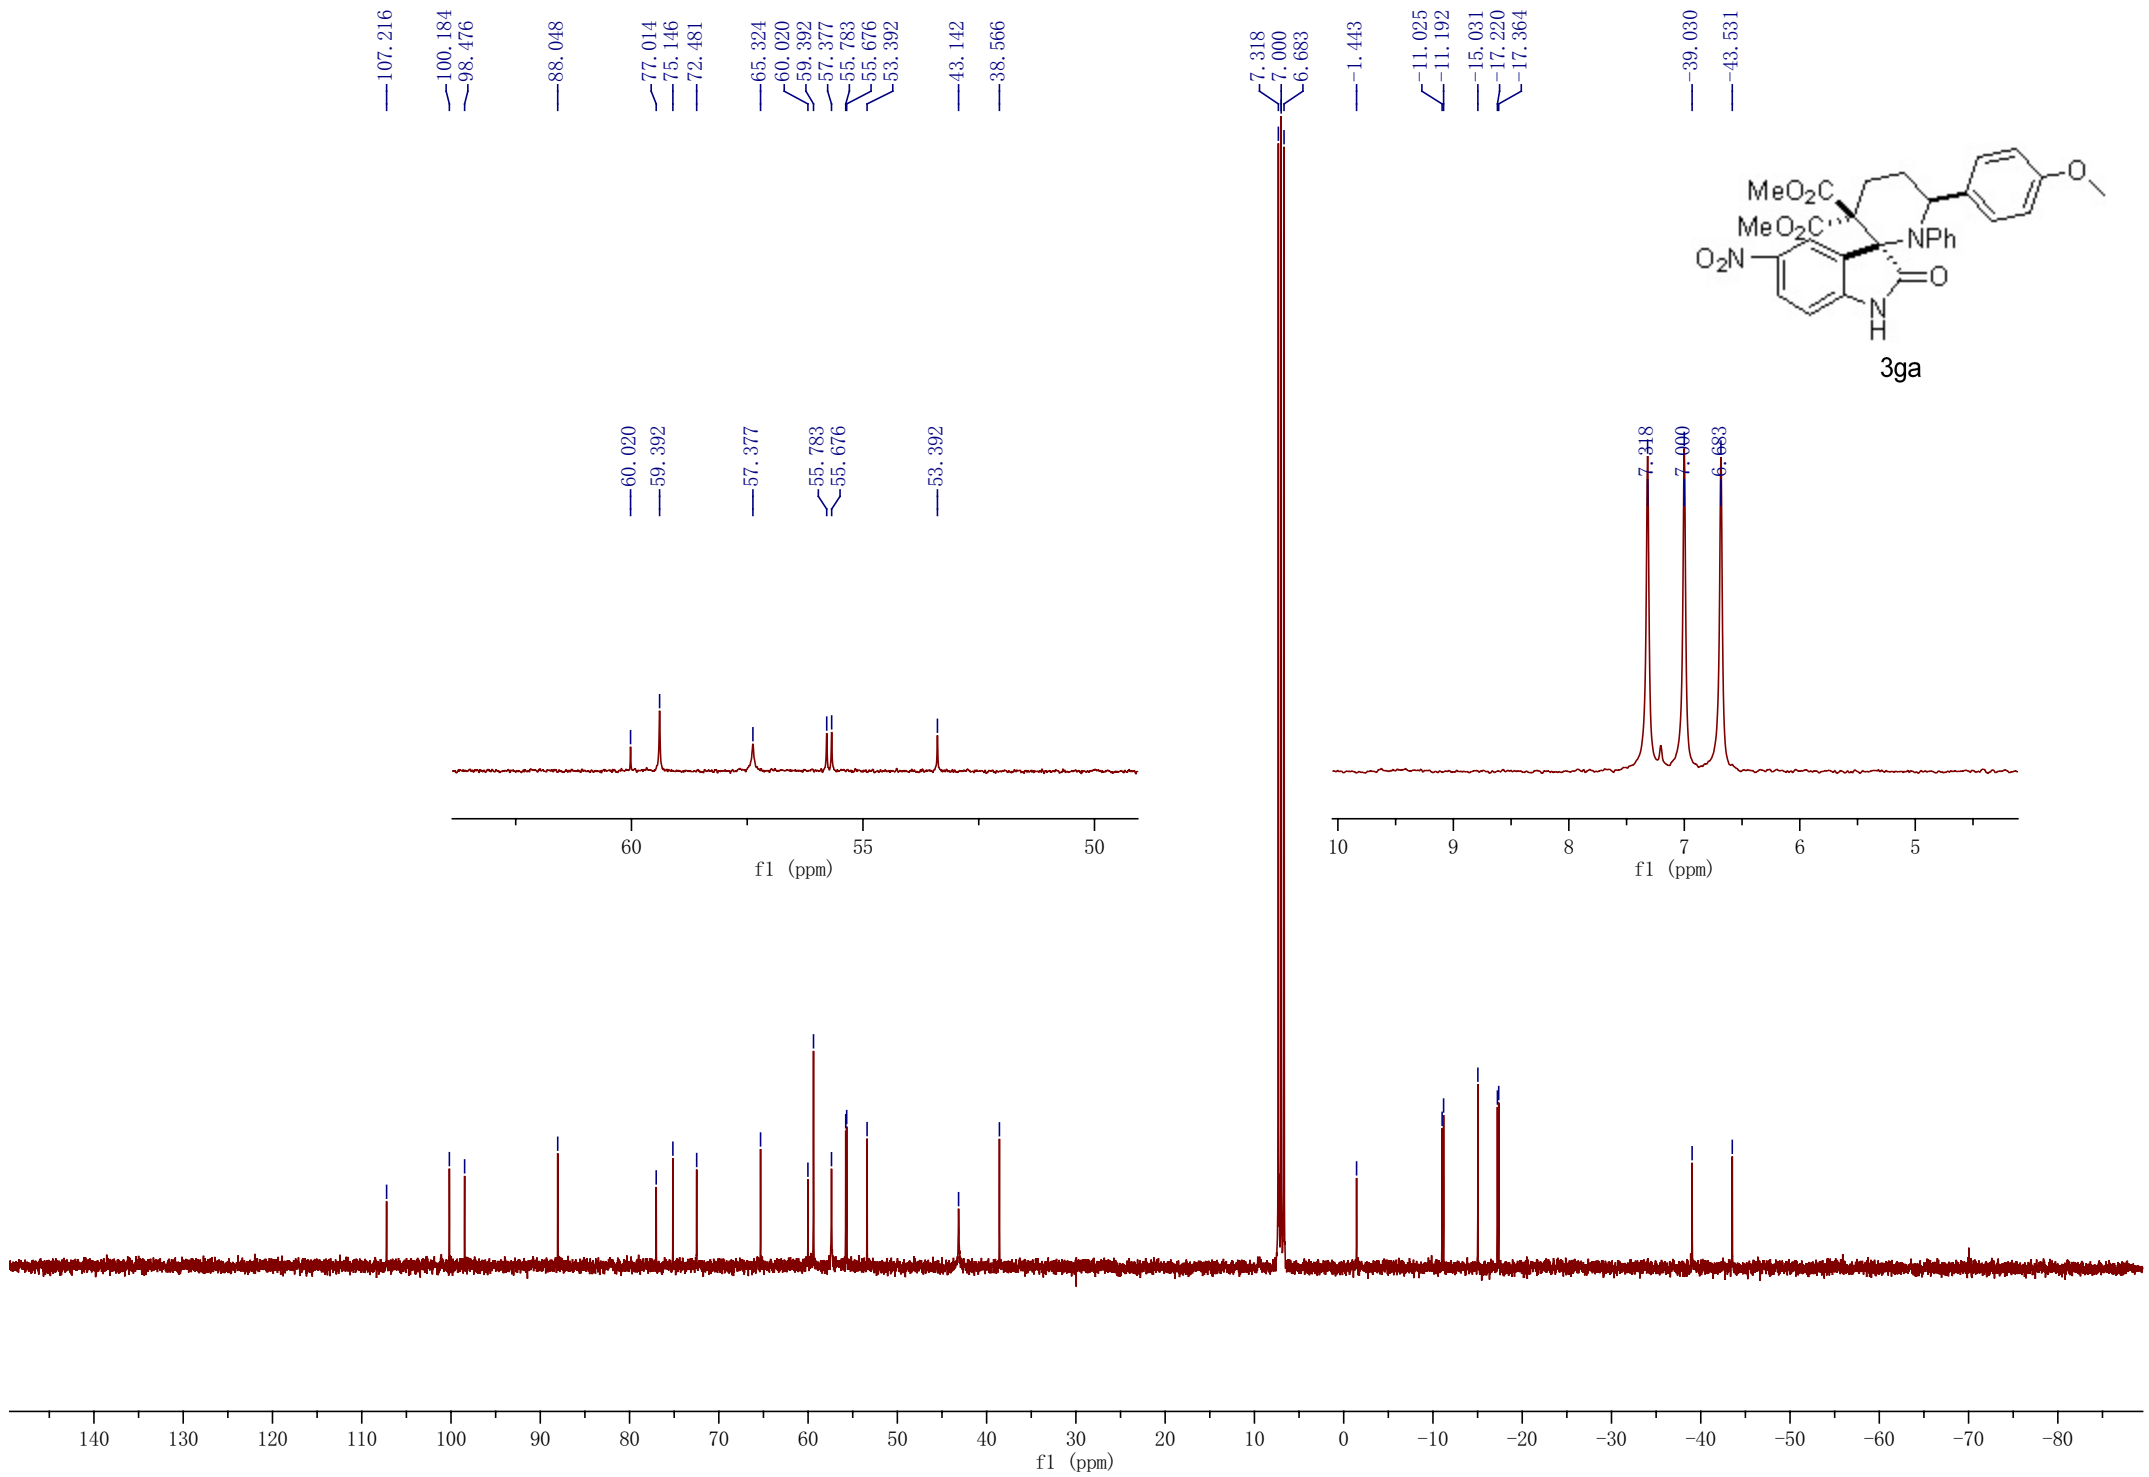

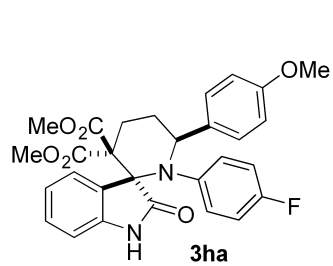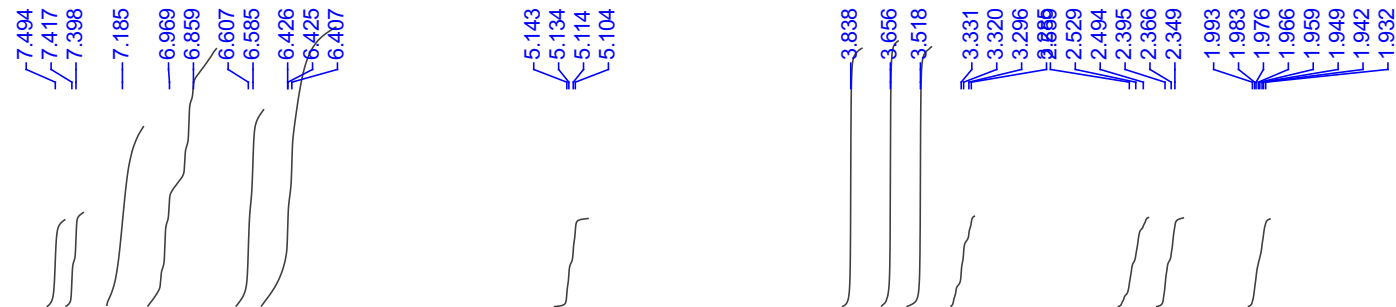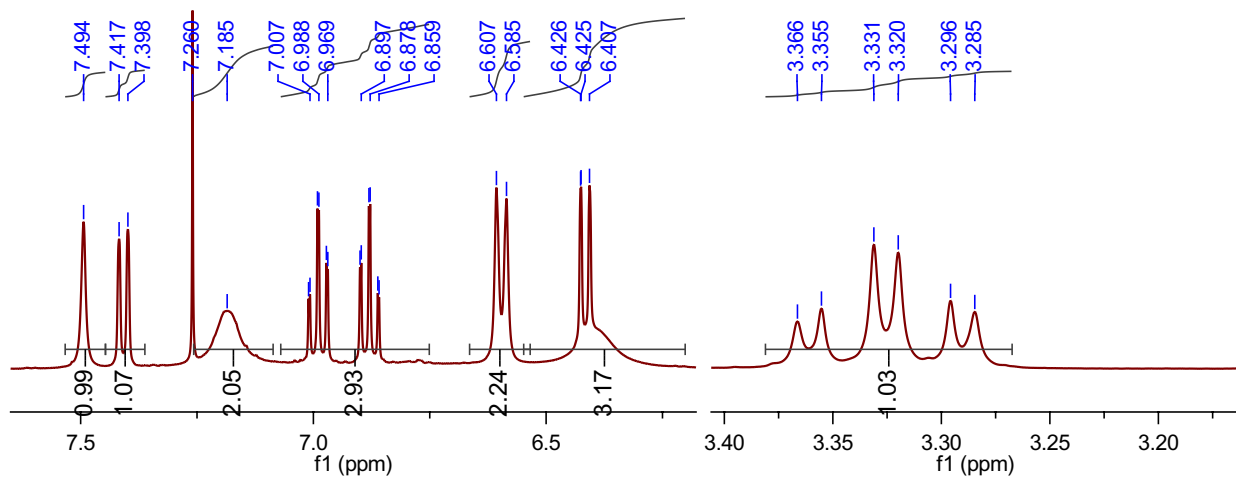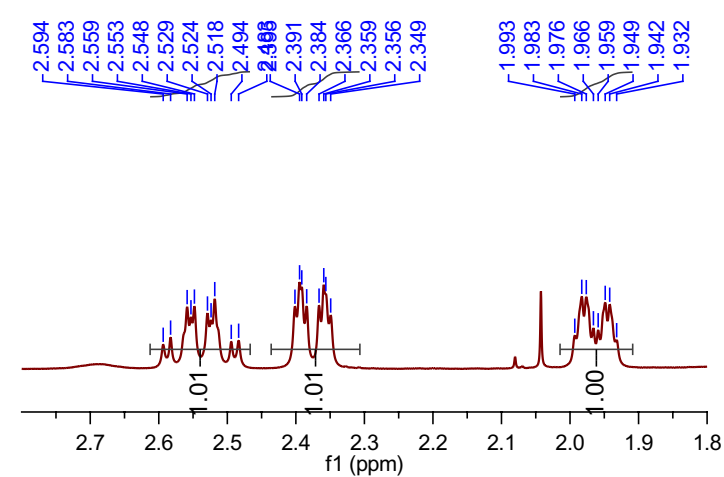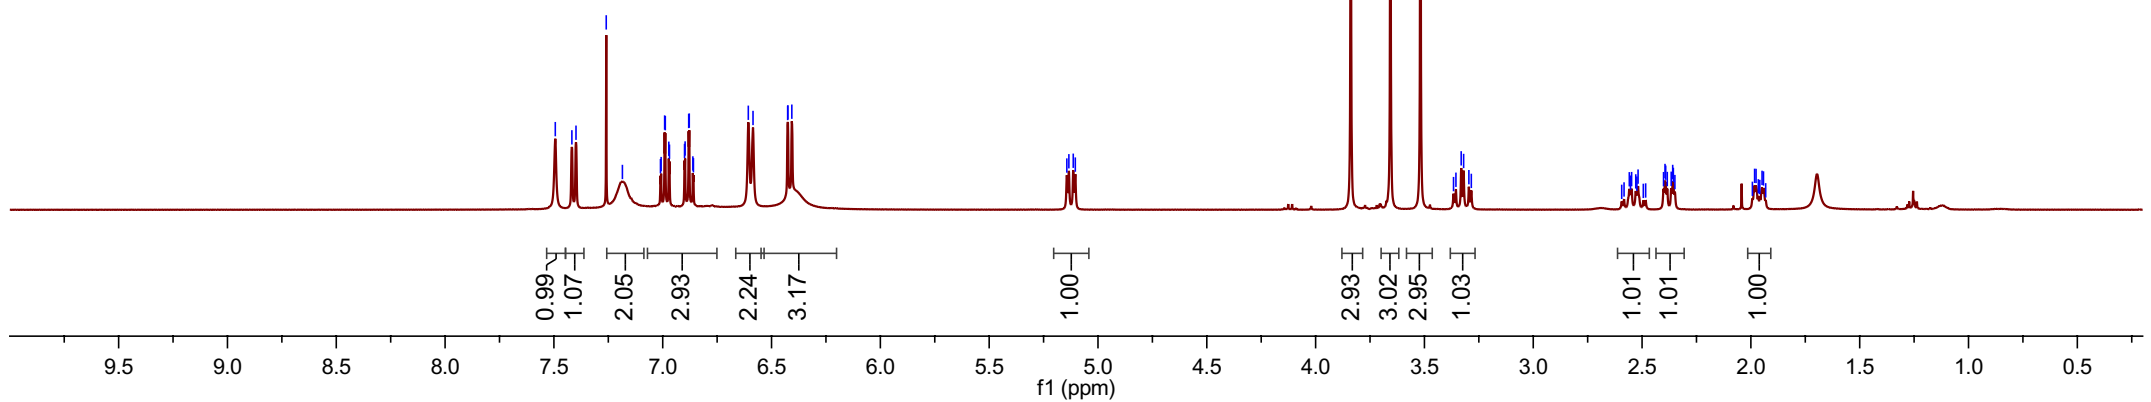

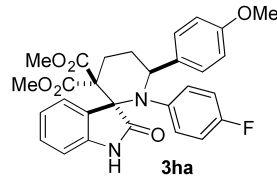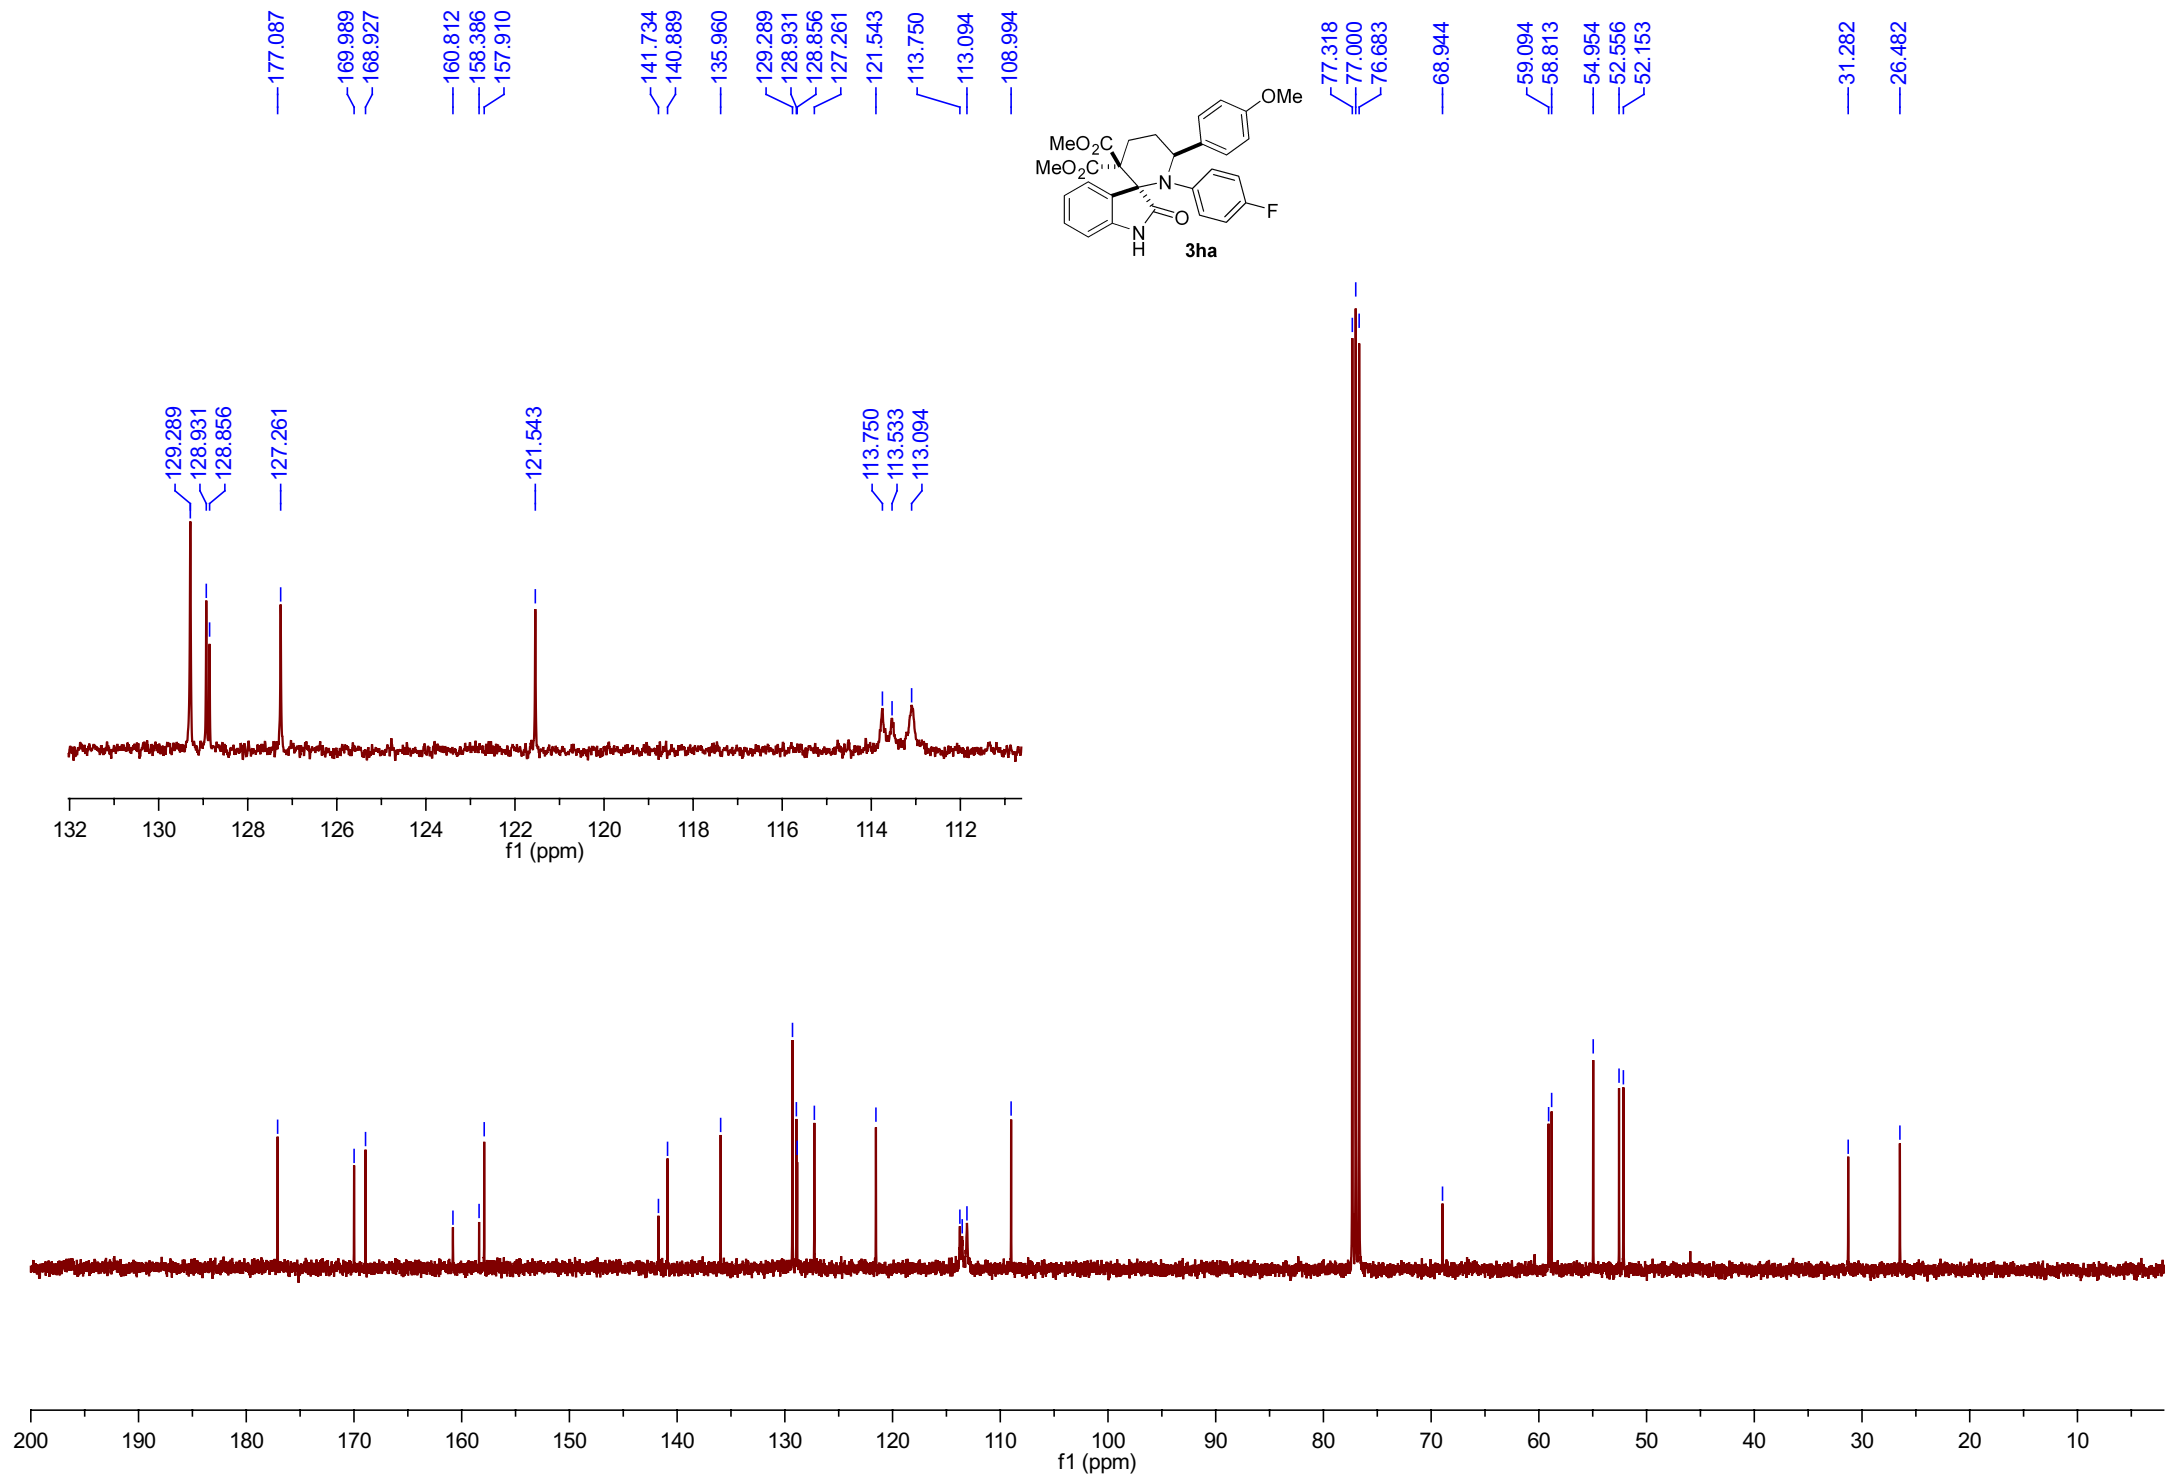

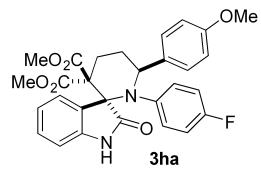

---116.798

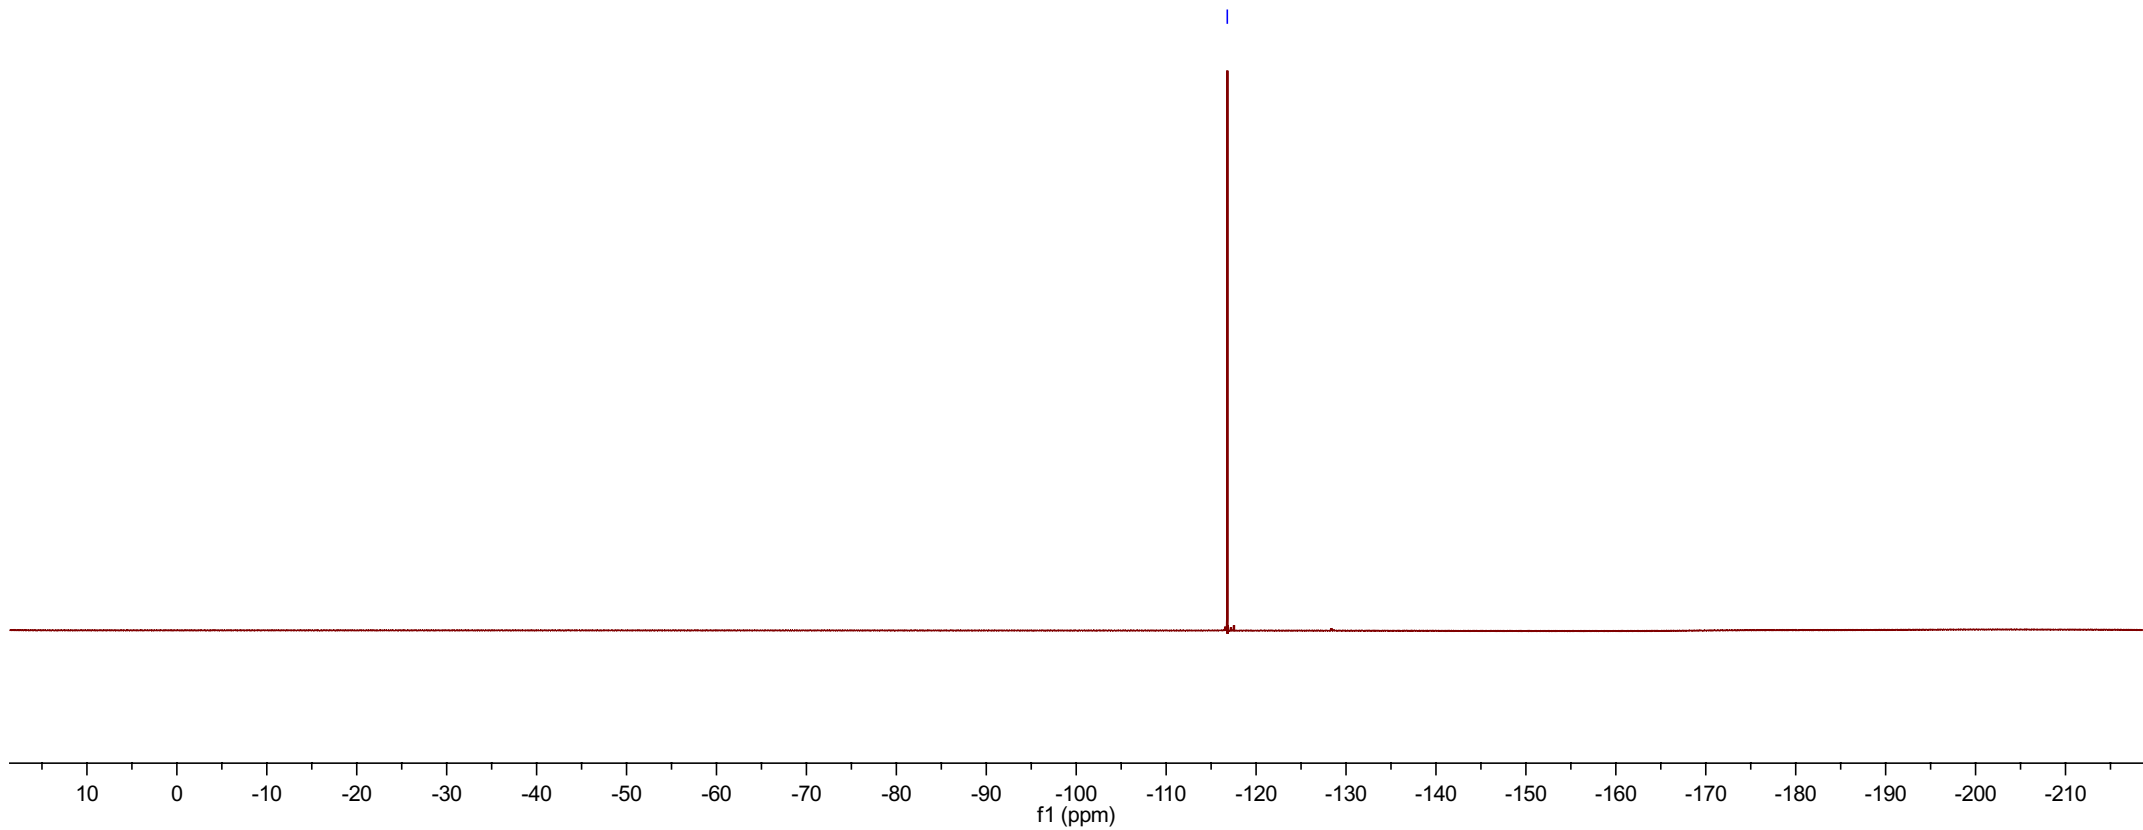

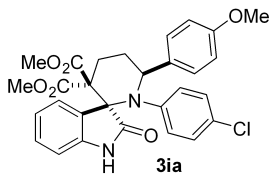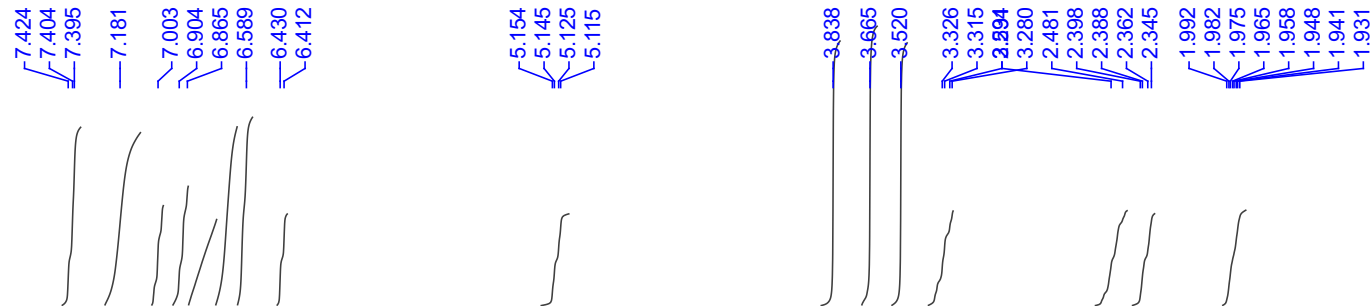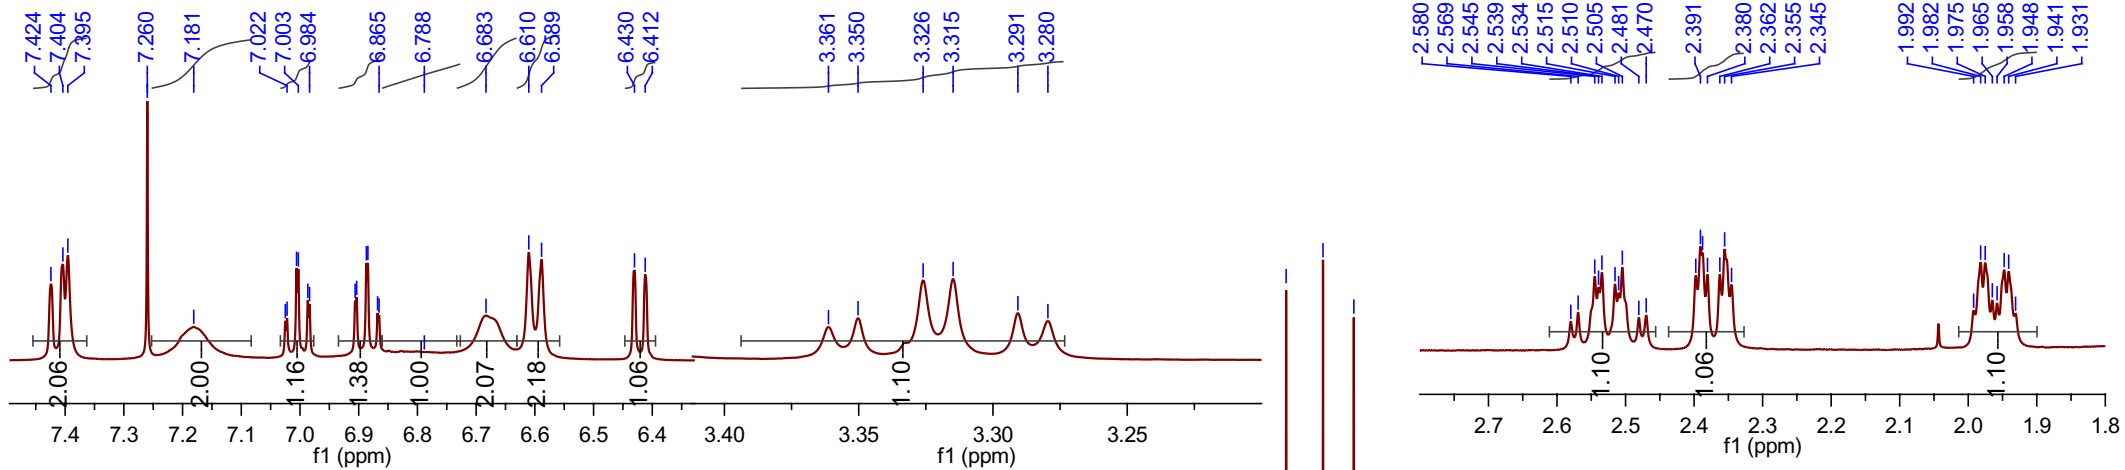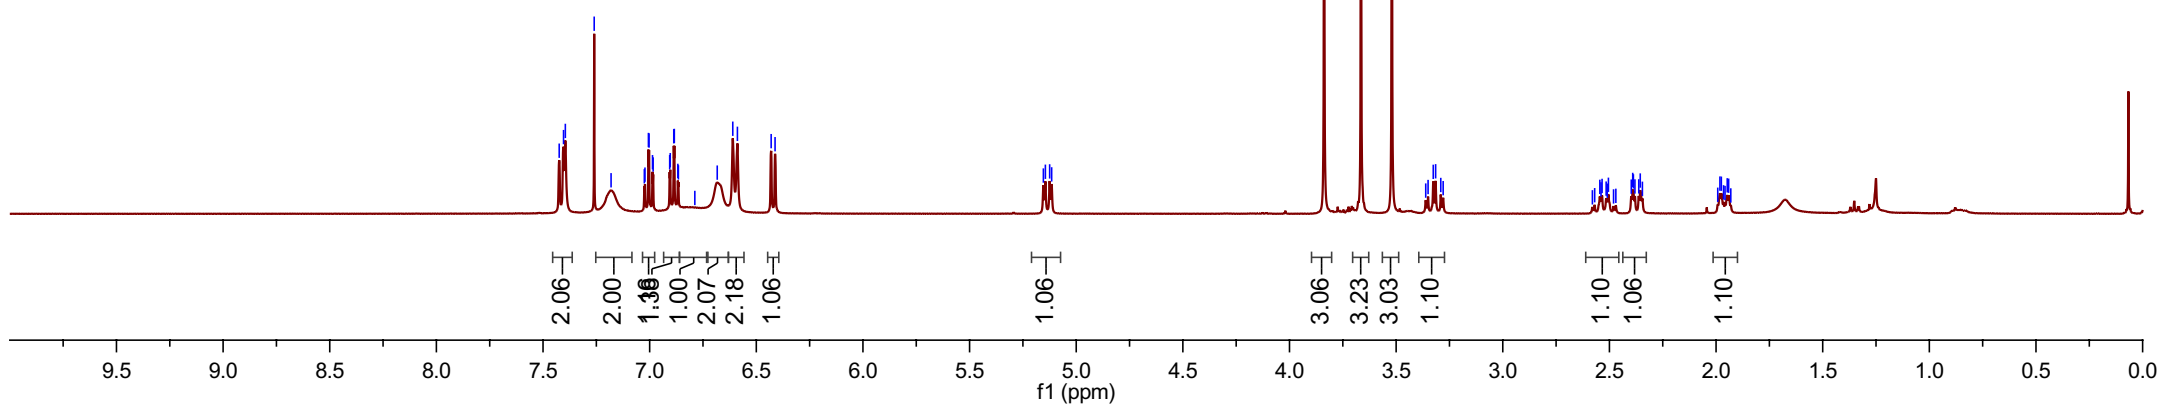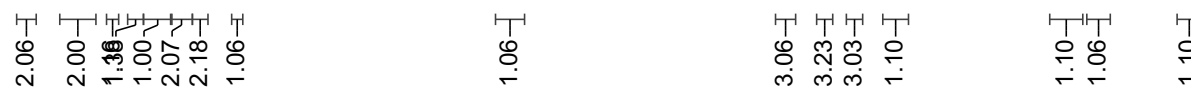

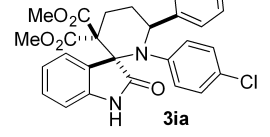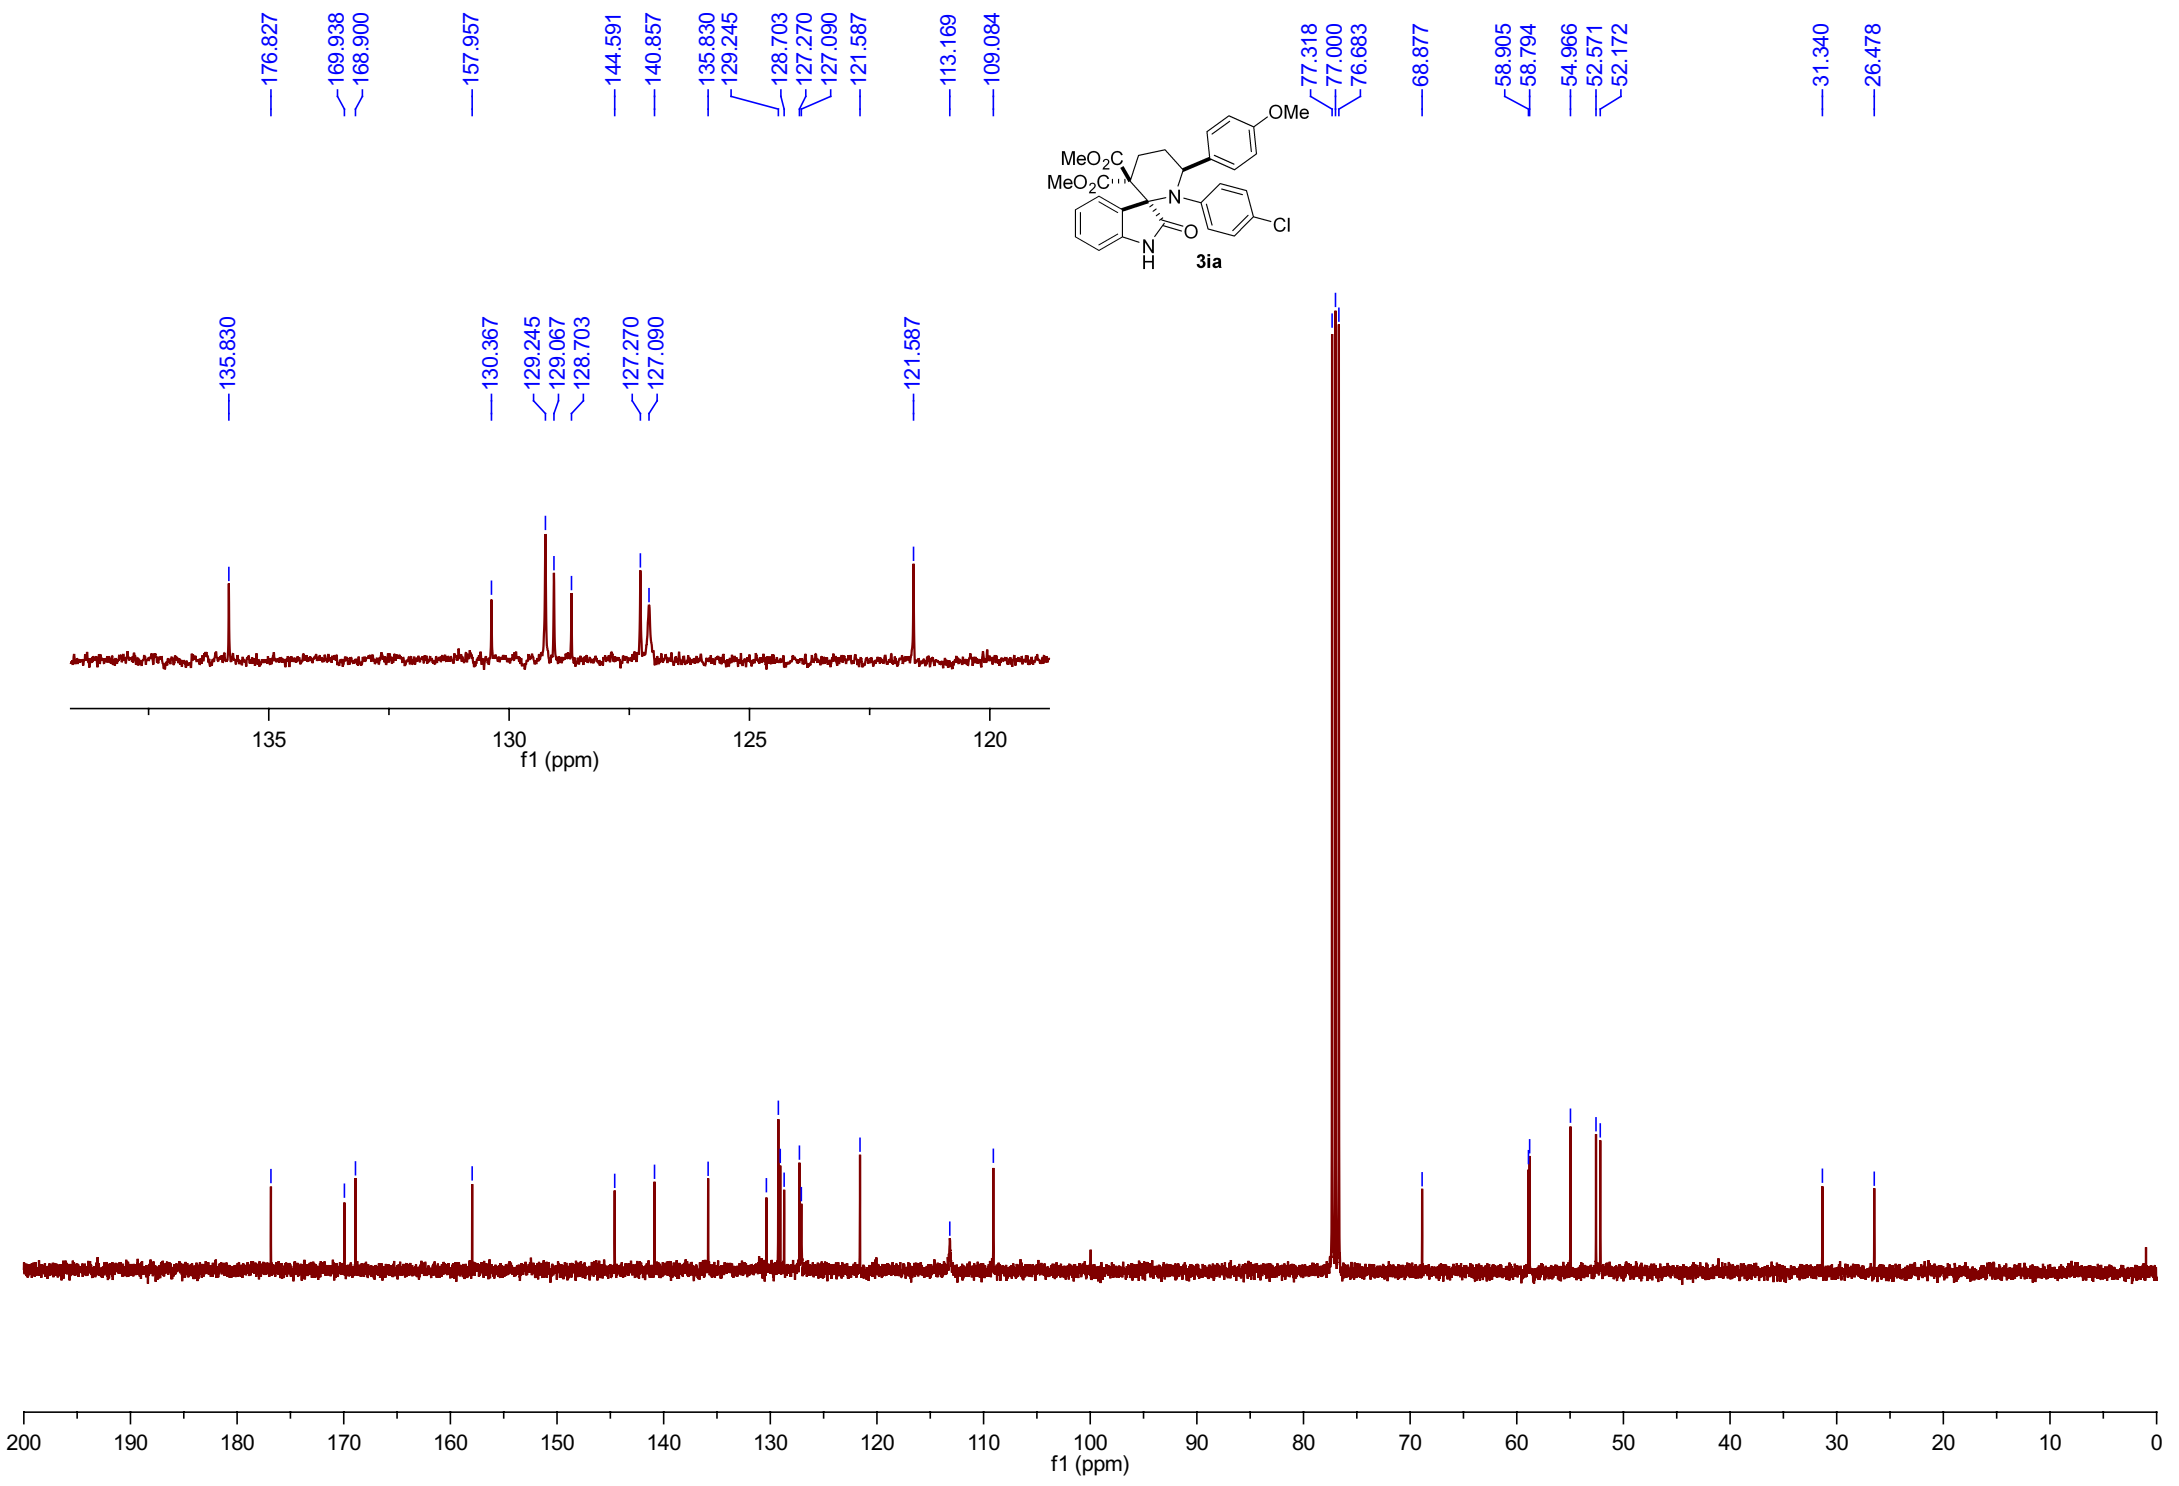



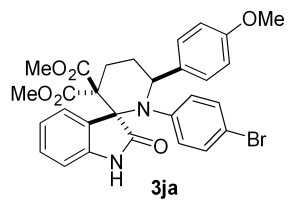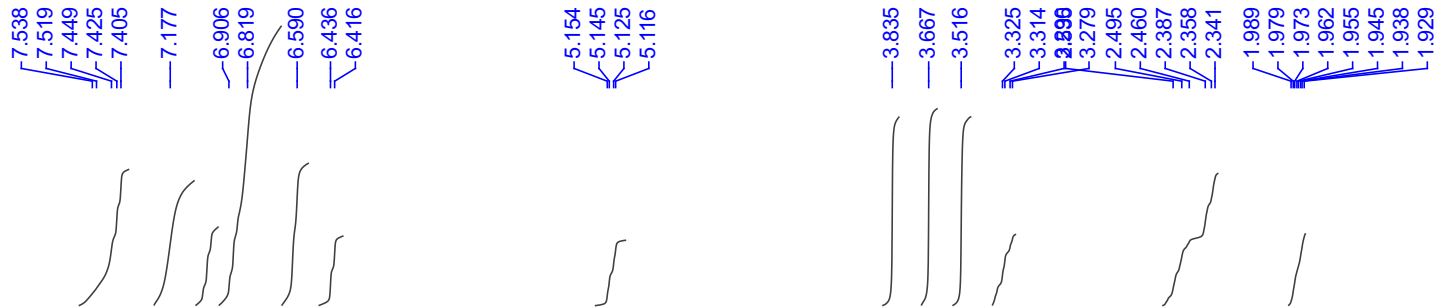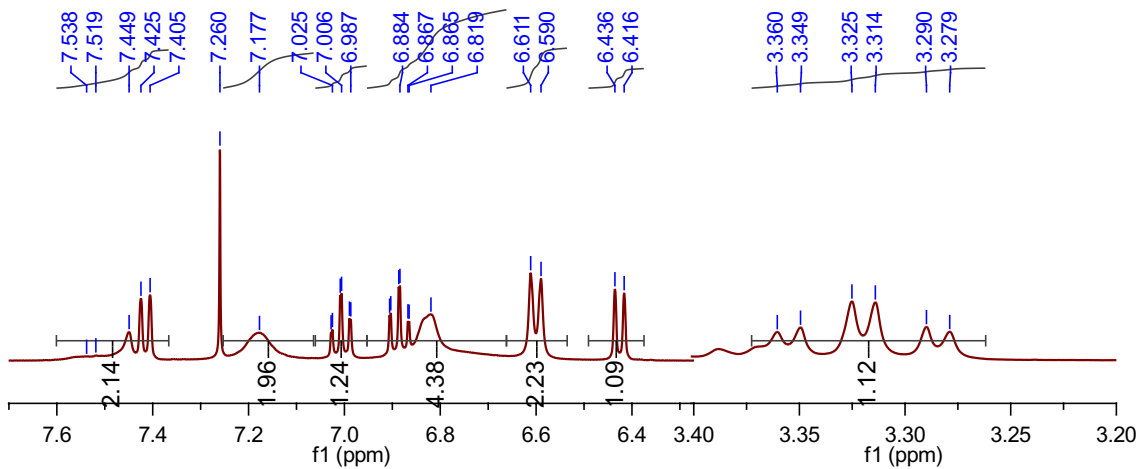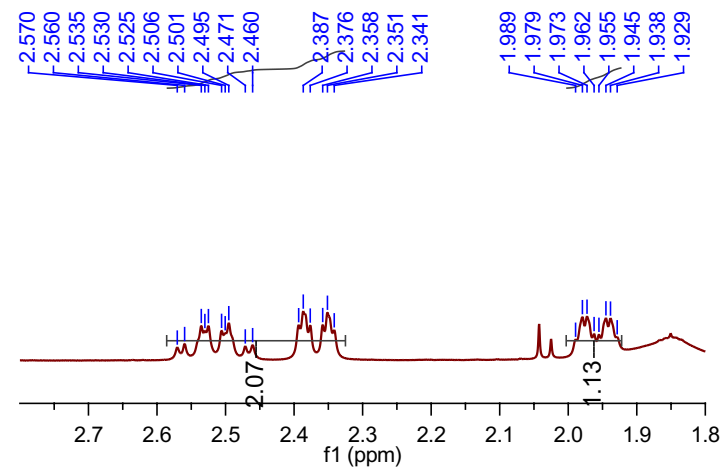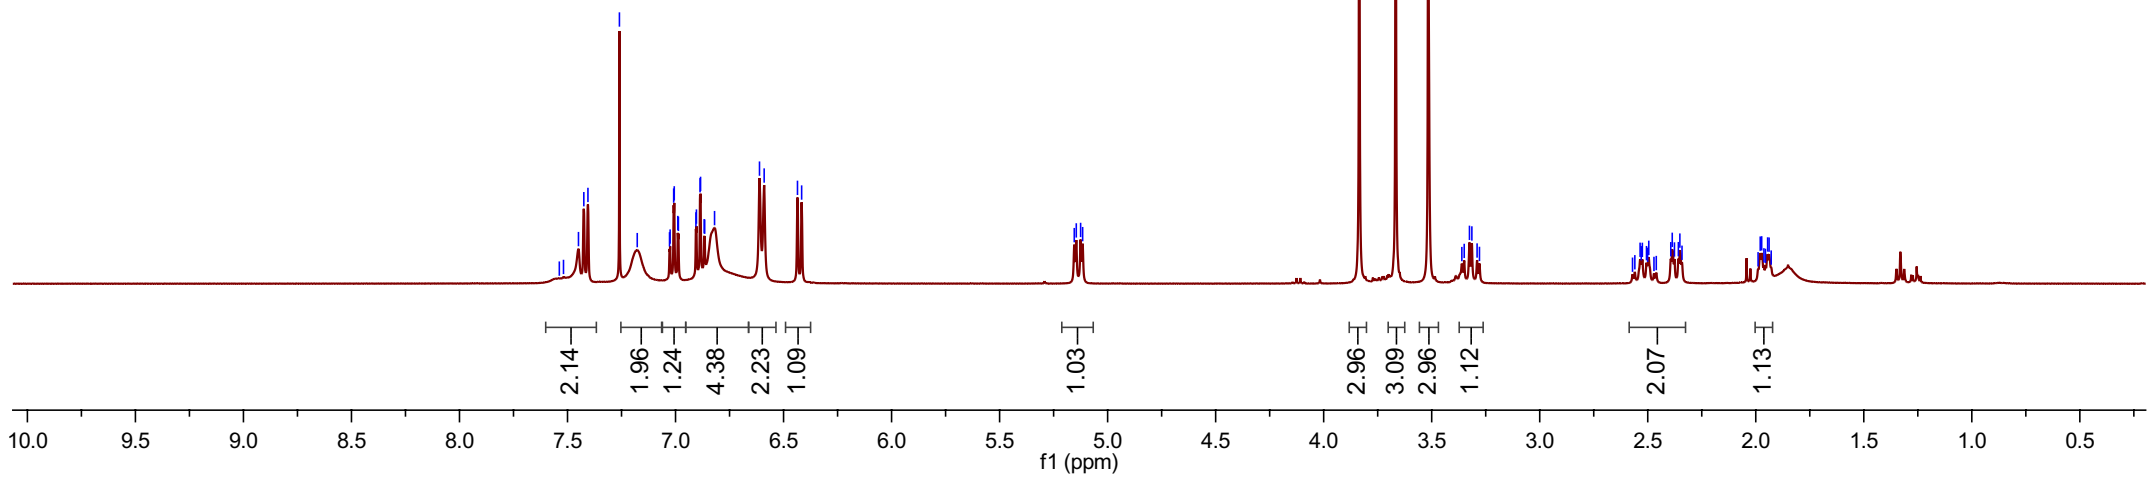

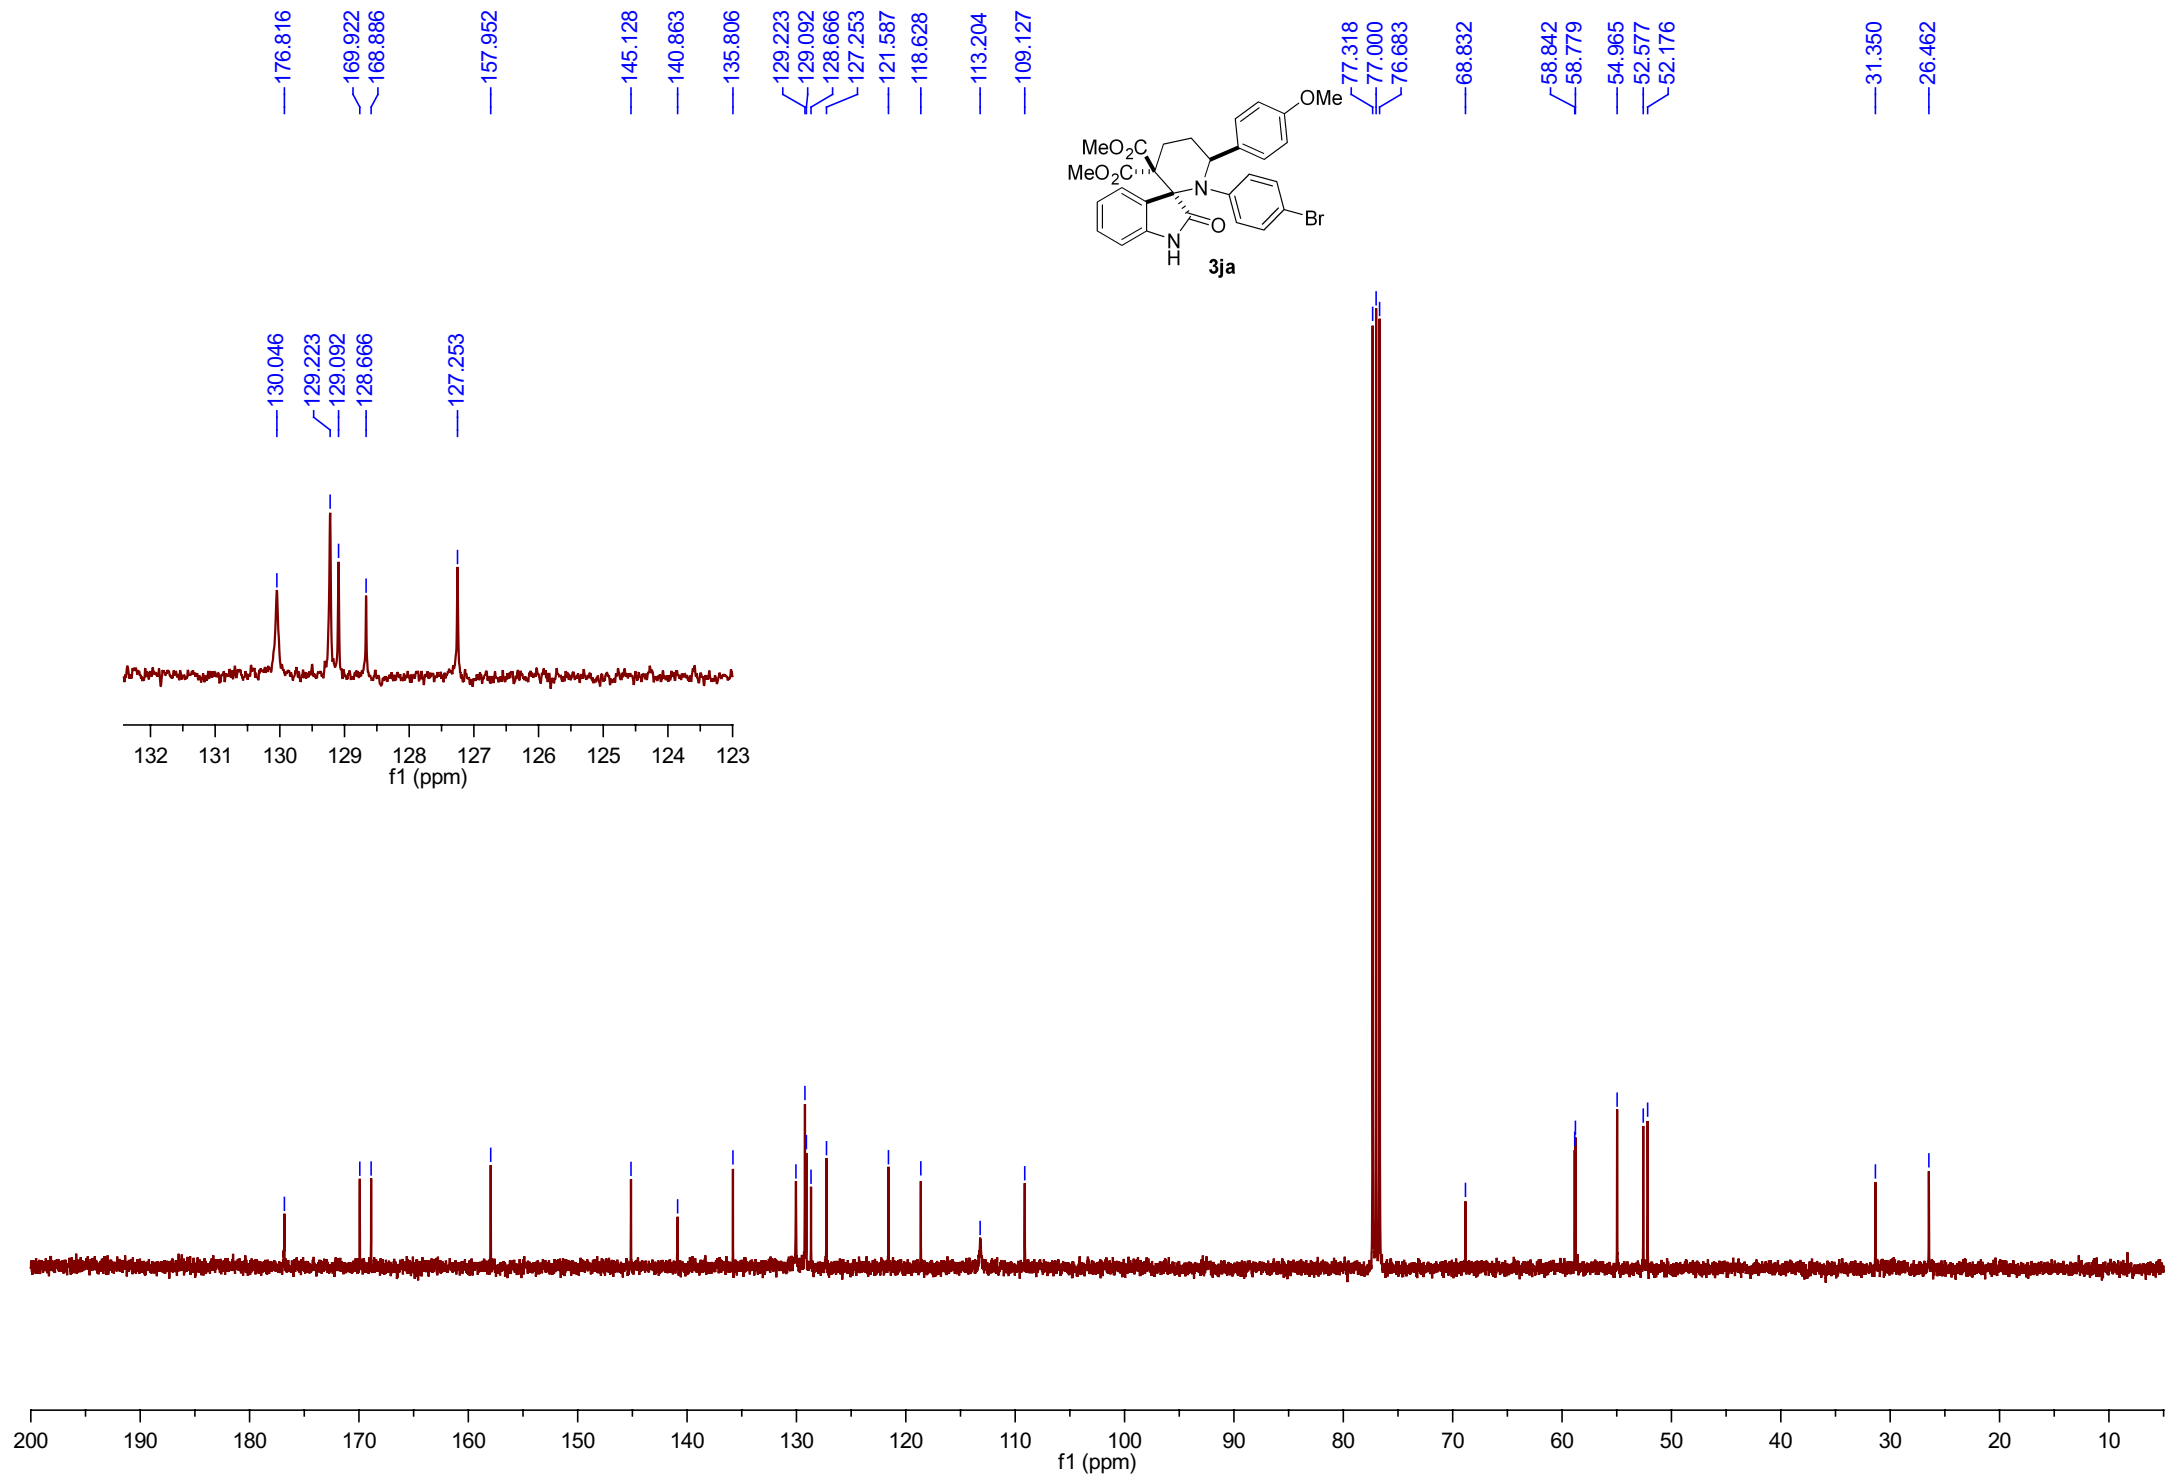

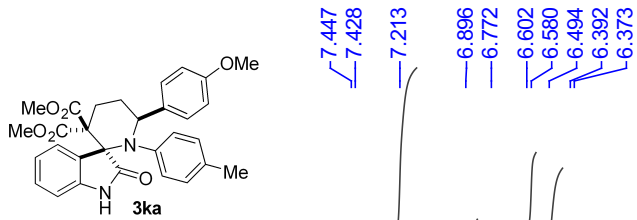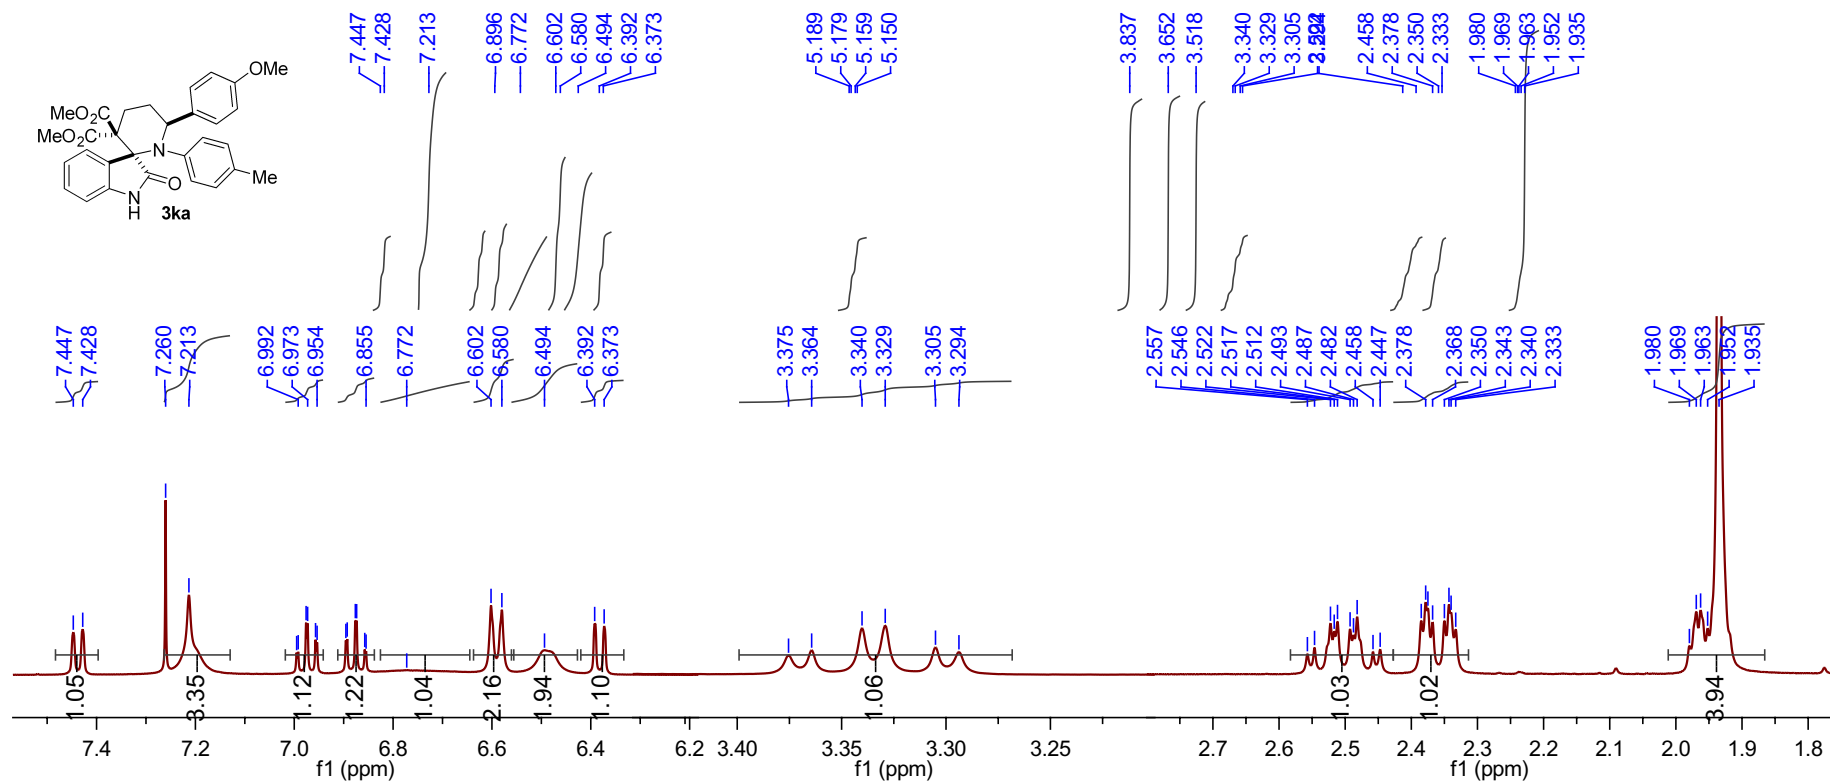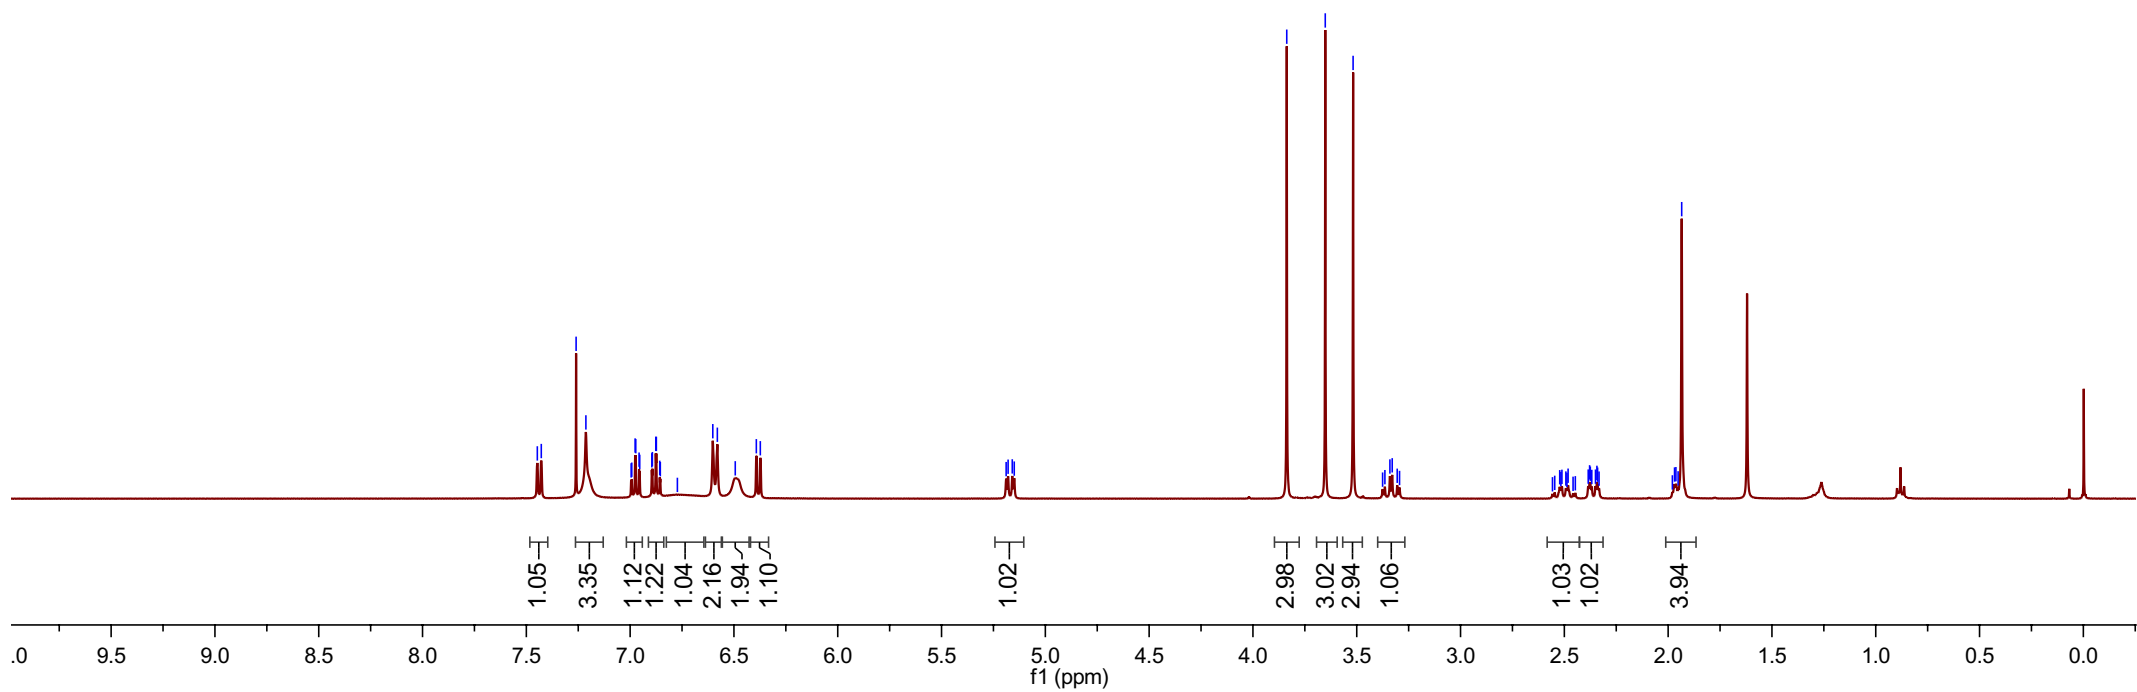

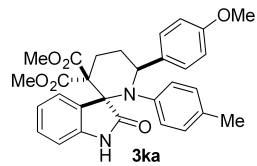

177.196  
170.060  
169.012  
157.733  
143.087  
140.896  
138.249  
128.669  
127.557  
127.456  
121.347  
112.952  
108.770

77.318  
77.000  
76.683  
68.989  
58.976  
58.887  
54.955  
52.502  
52.099  
31.592  
26.528  
20.738

136.561  
134.244  
129.249  
129.173  
128.669  
127.557  
127.456

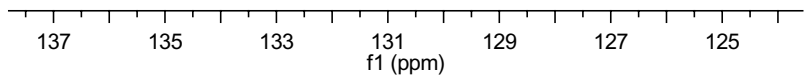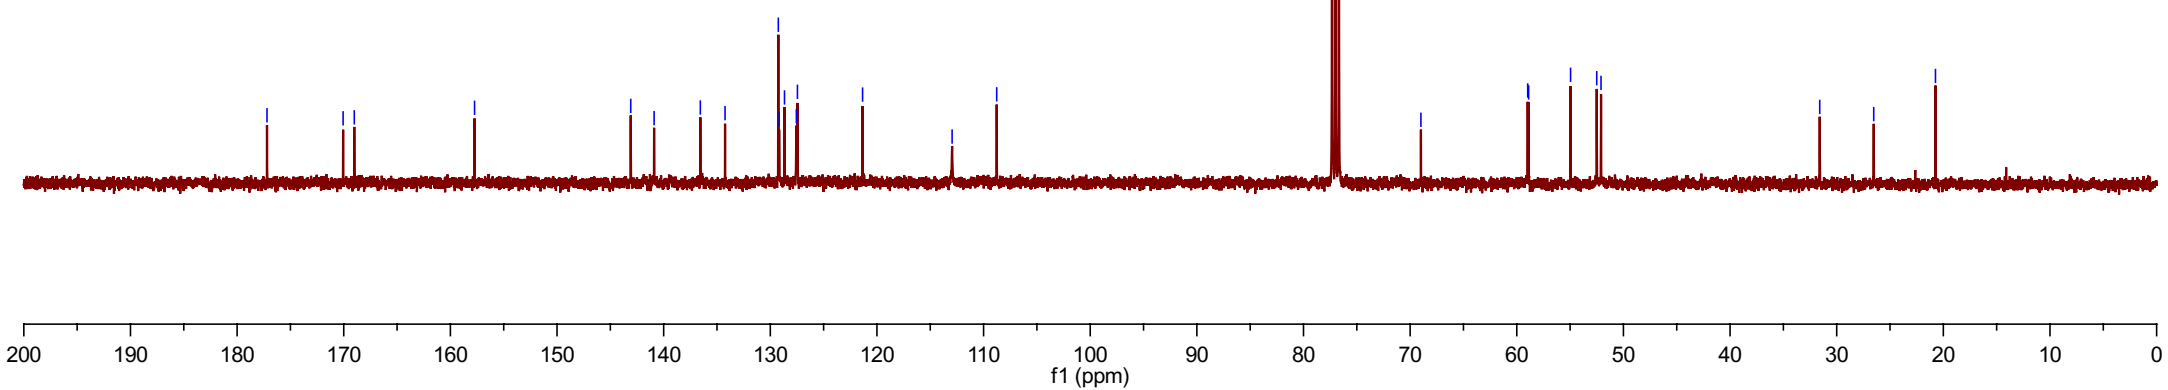

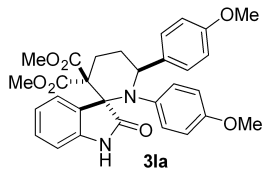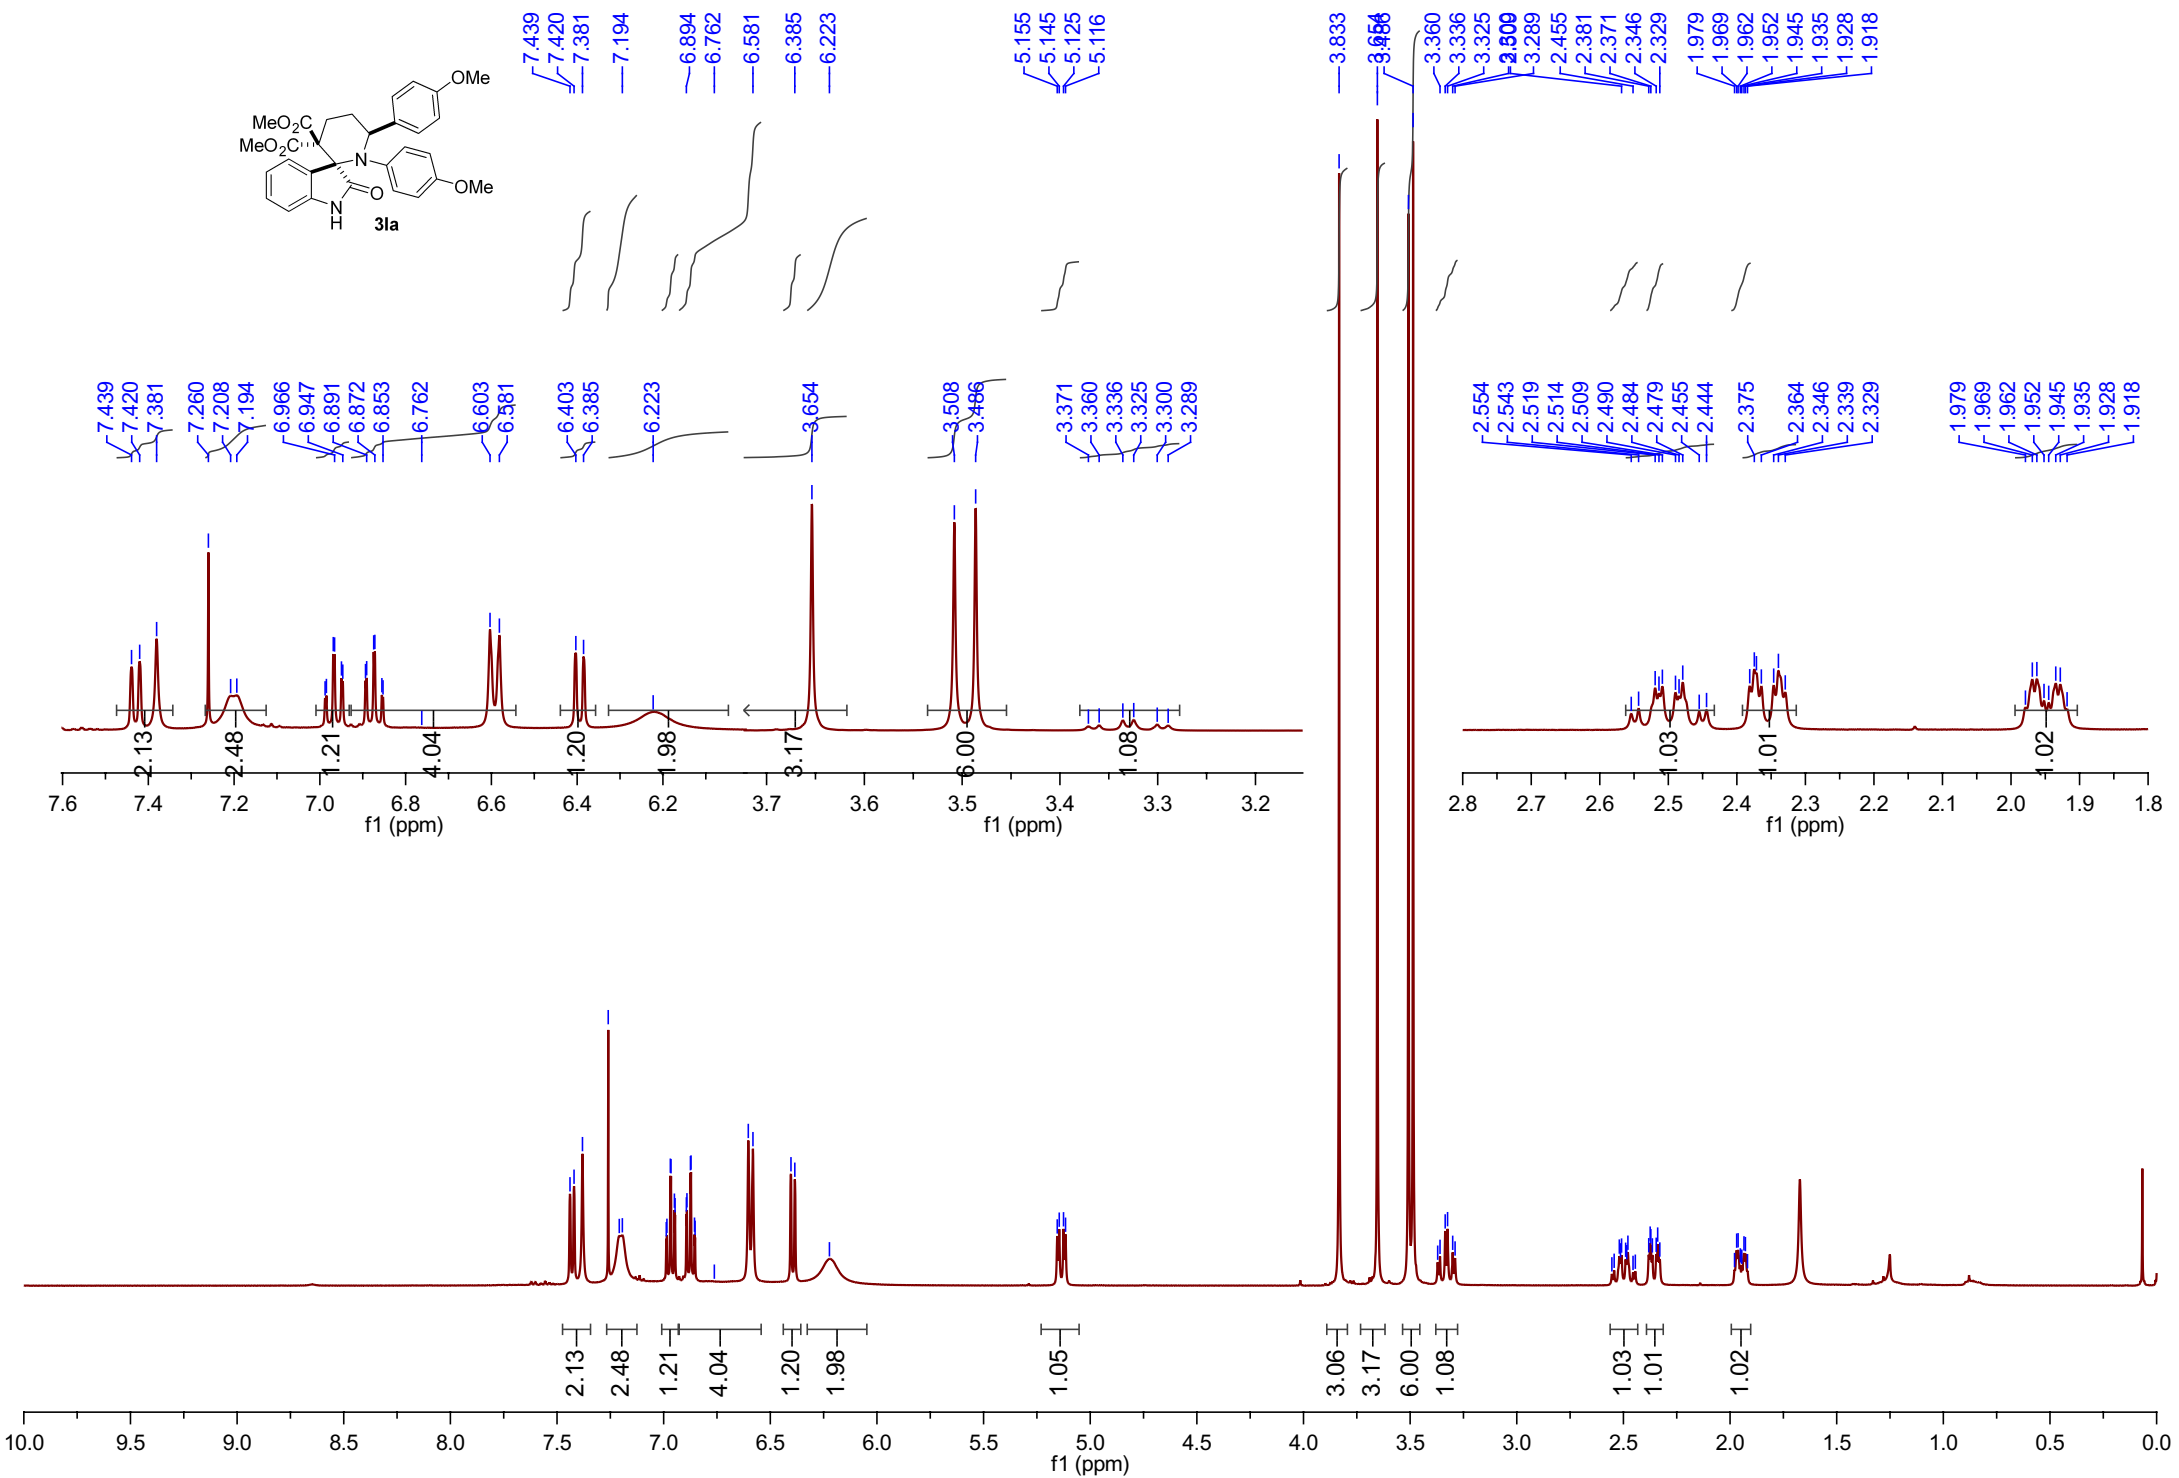

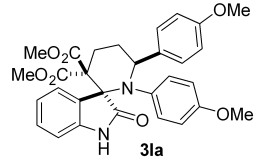

177.362

170.045  
168.993

157.745  
156.178

140.907  
138.643  
136.491

129.228  
129.192  
128.706  
127.315

121.417

112.994  
111.975  
108.887

77.318  
77.000  
76.683

69.077

59.109  
58.958

54.944  
54.802  
52.505  
52.098

31.504

26.504

129.228  
129.192  
128.706  
127.315

121.417

112.994  
111.975

108.887

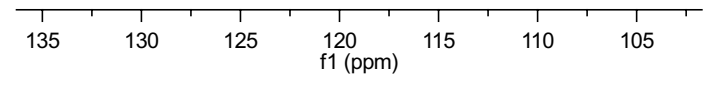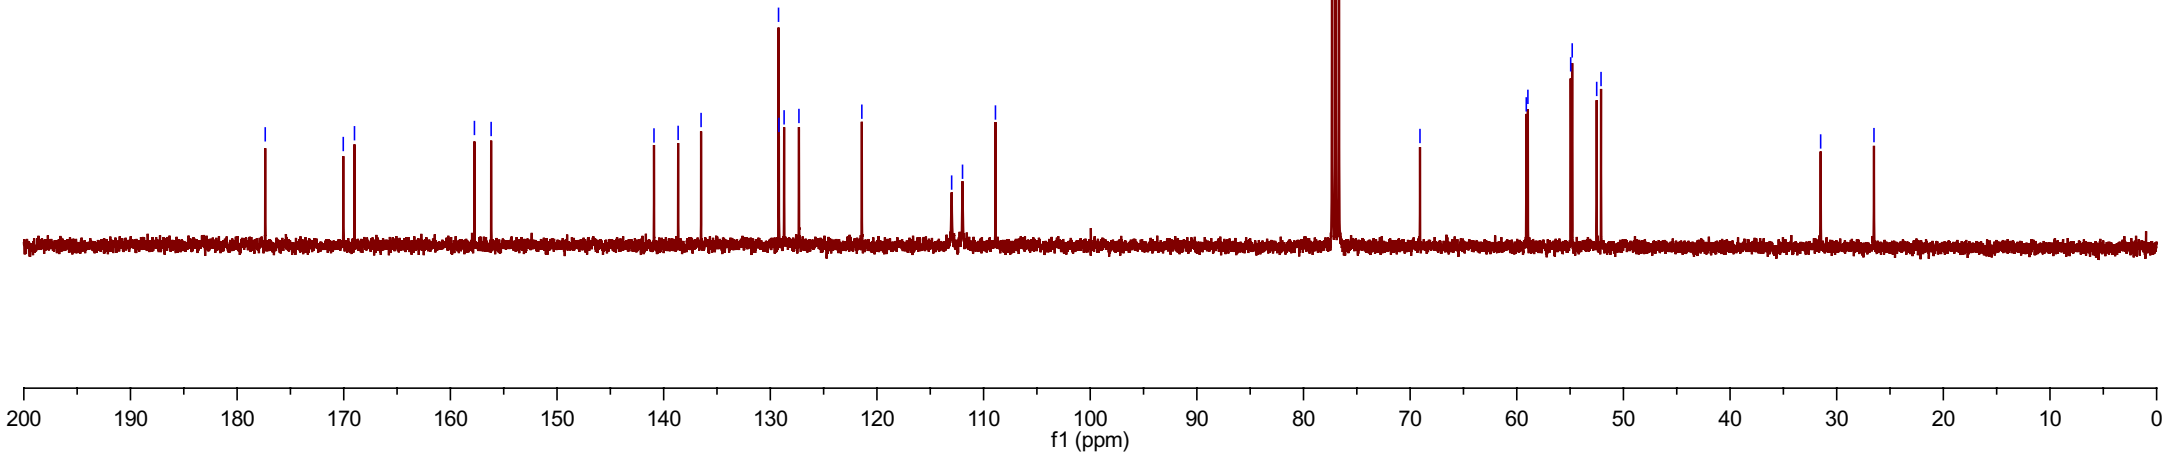

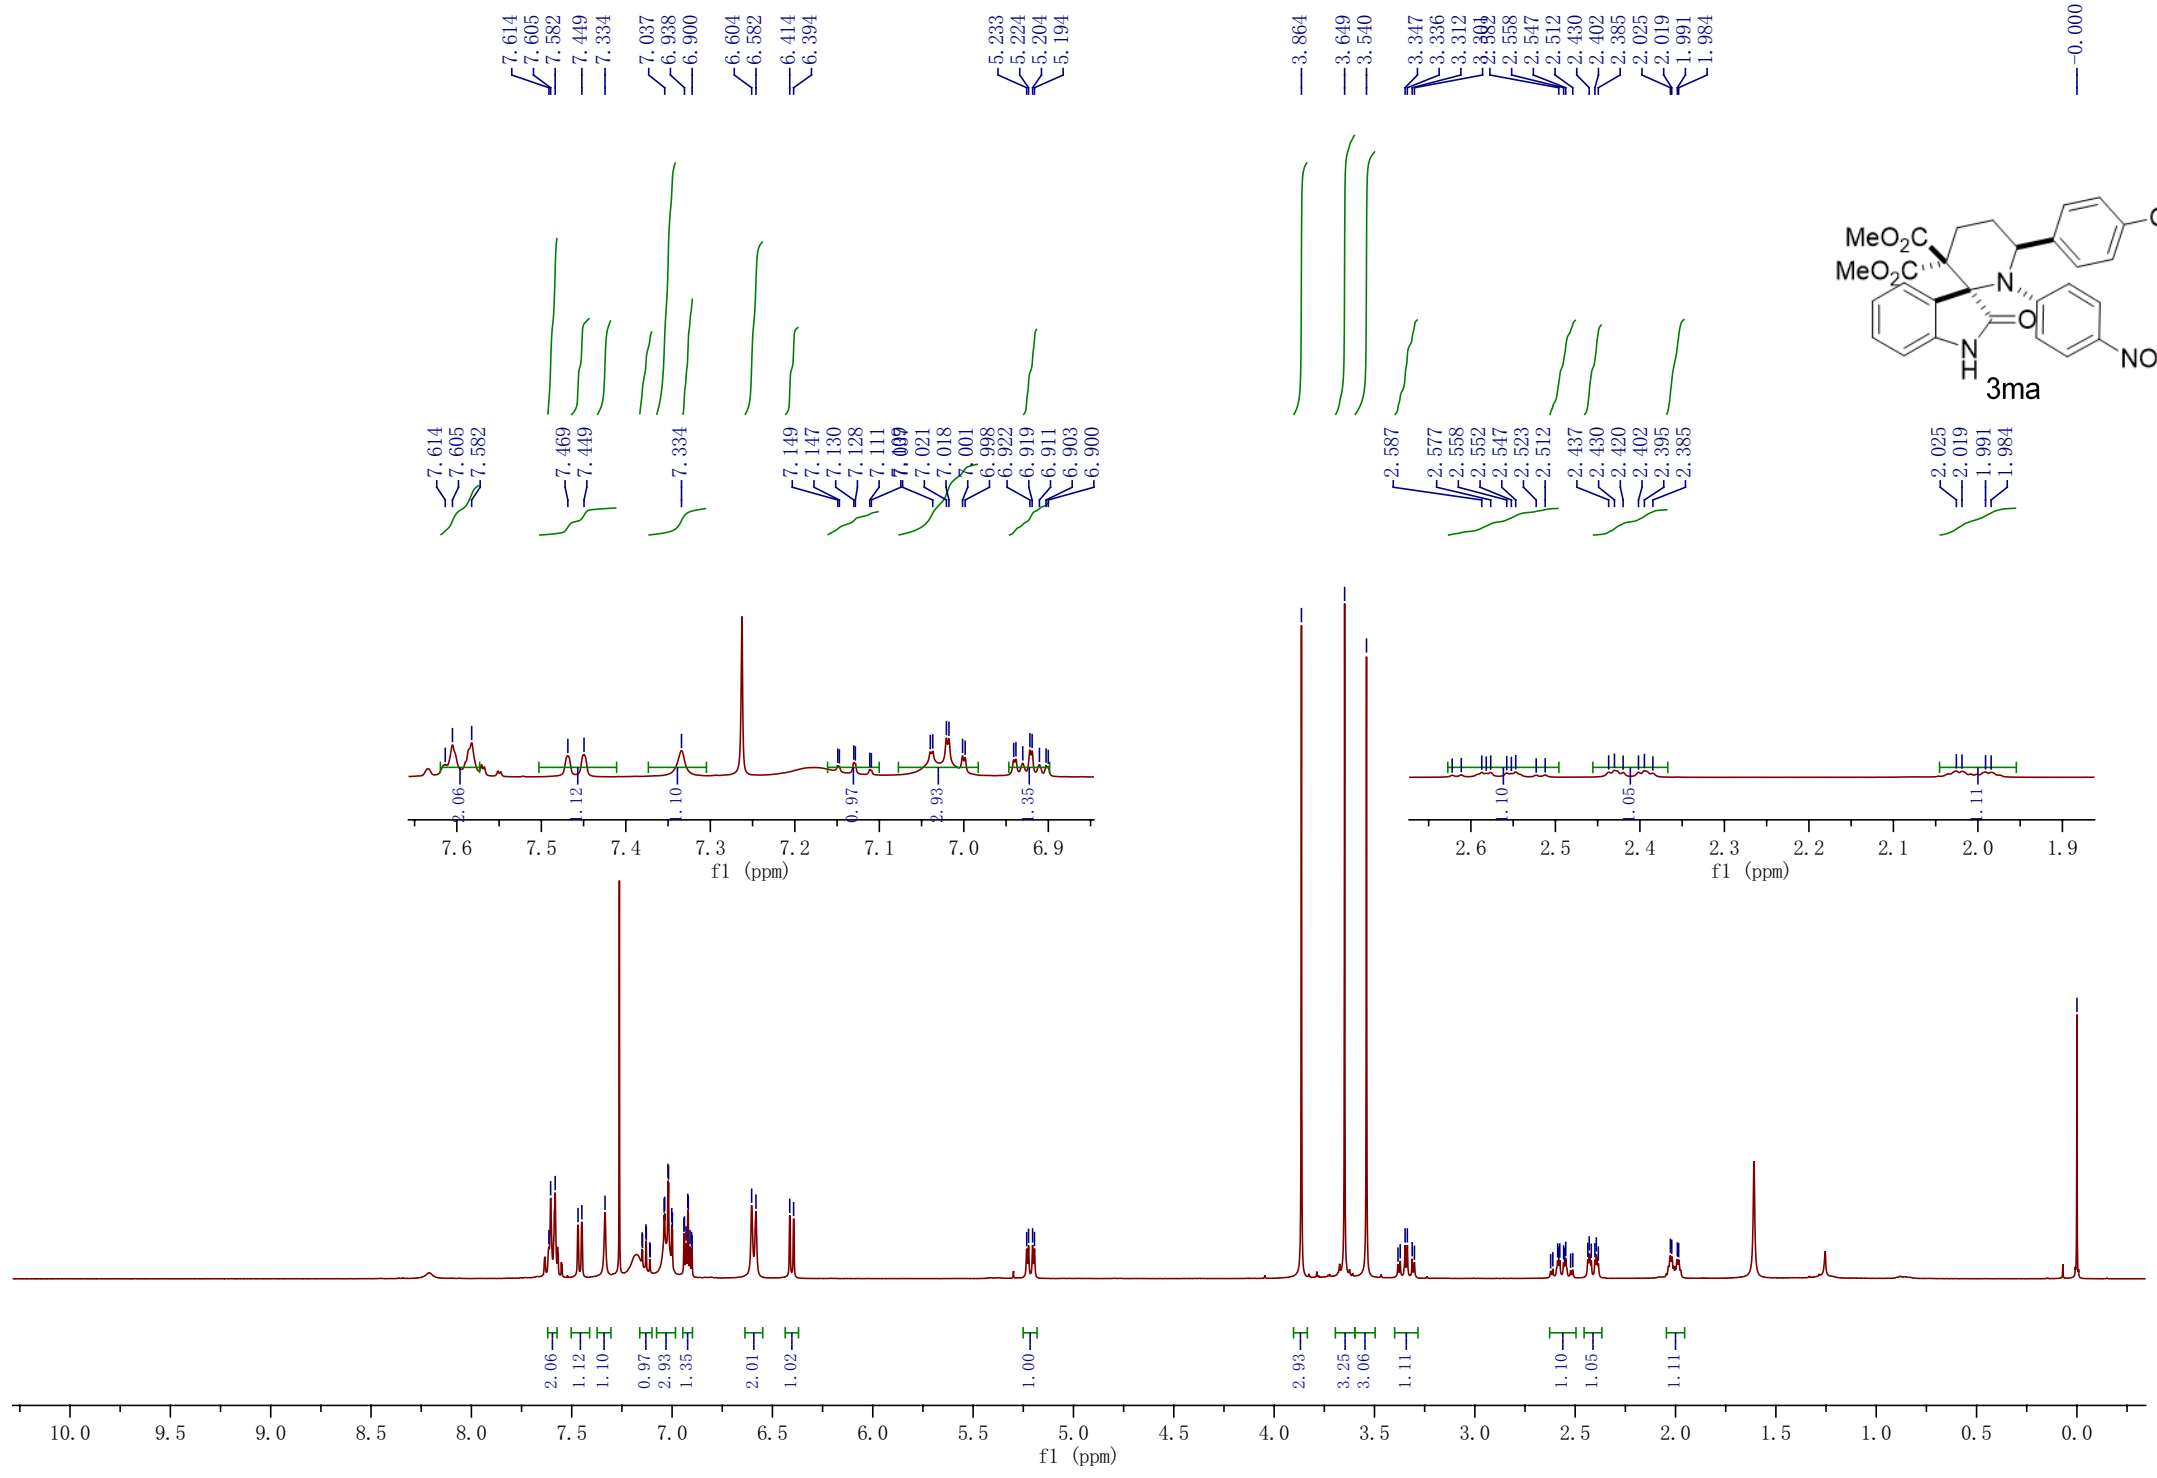

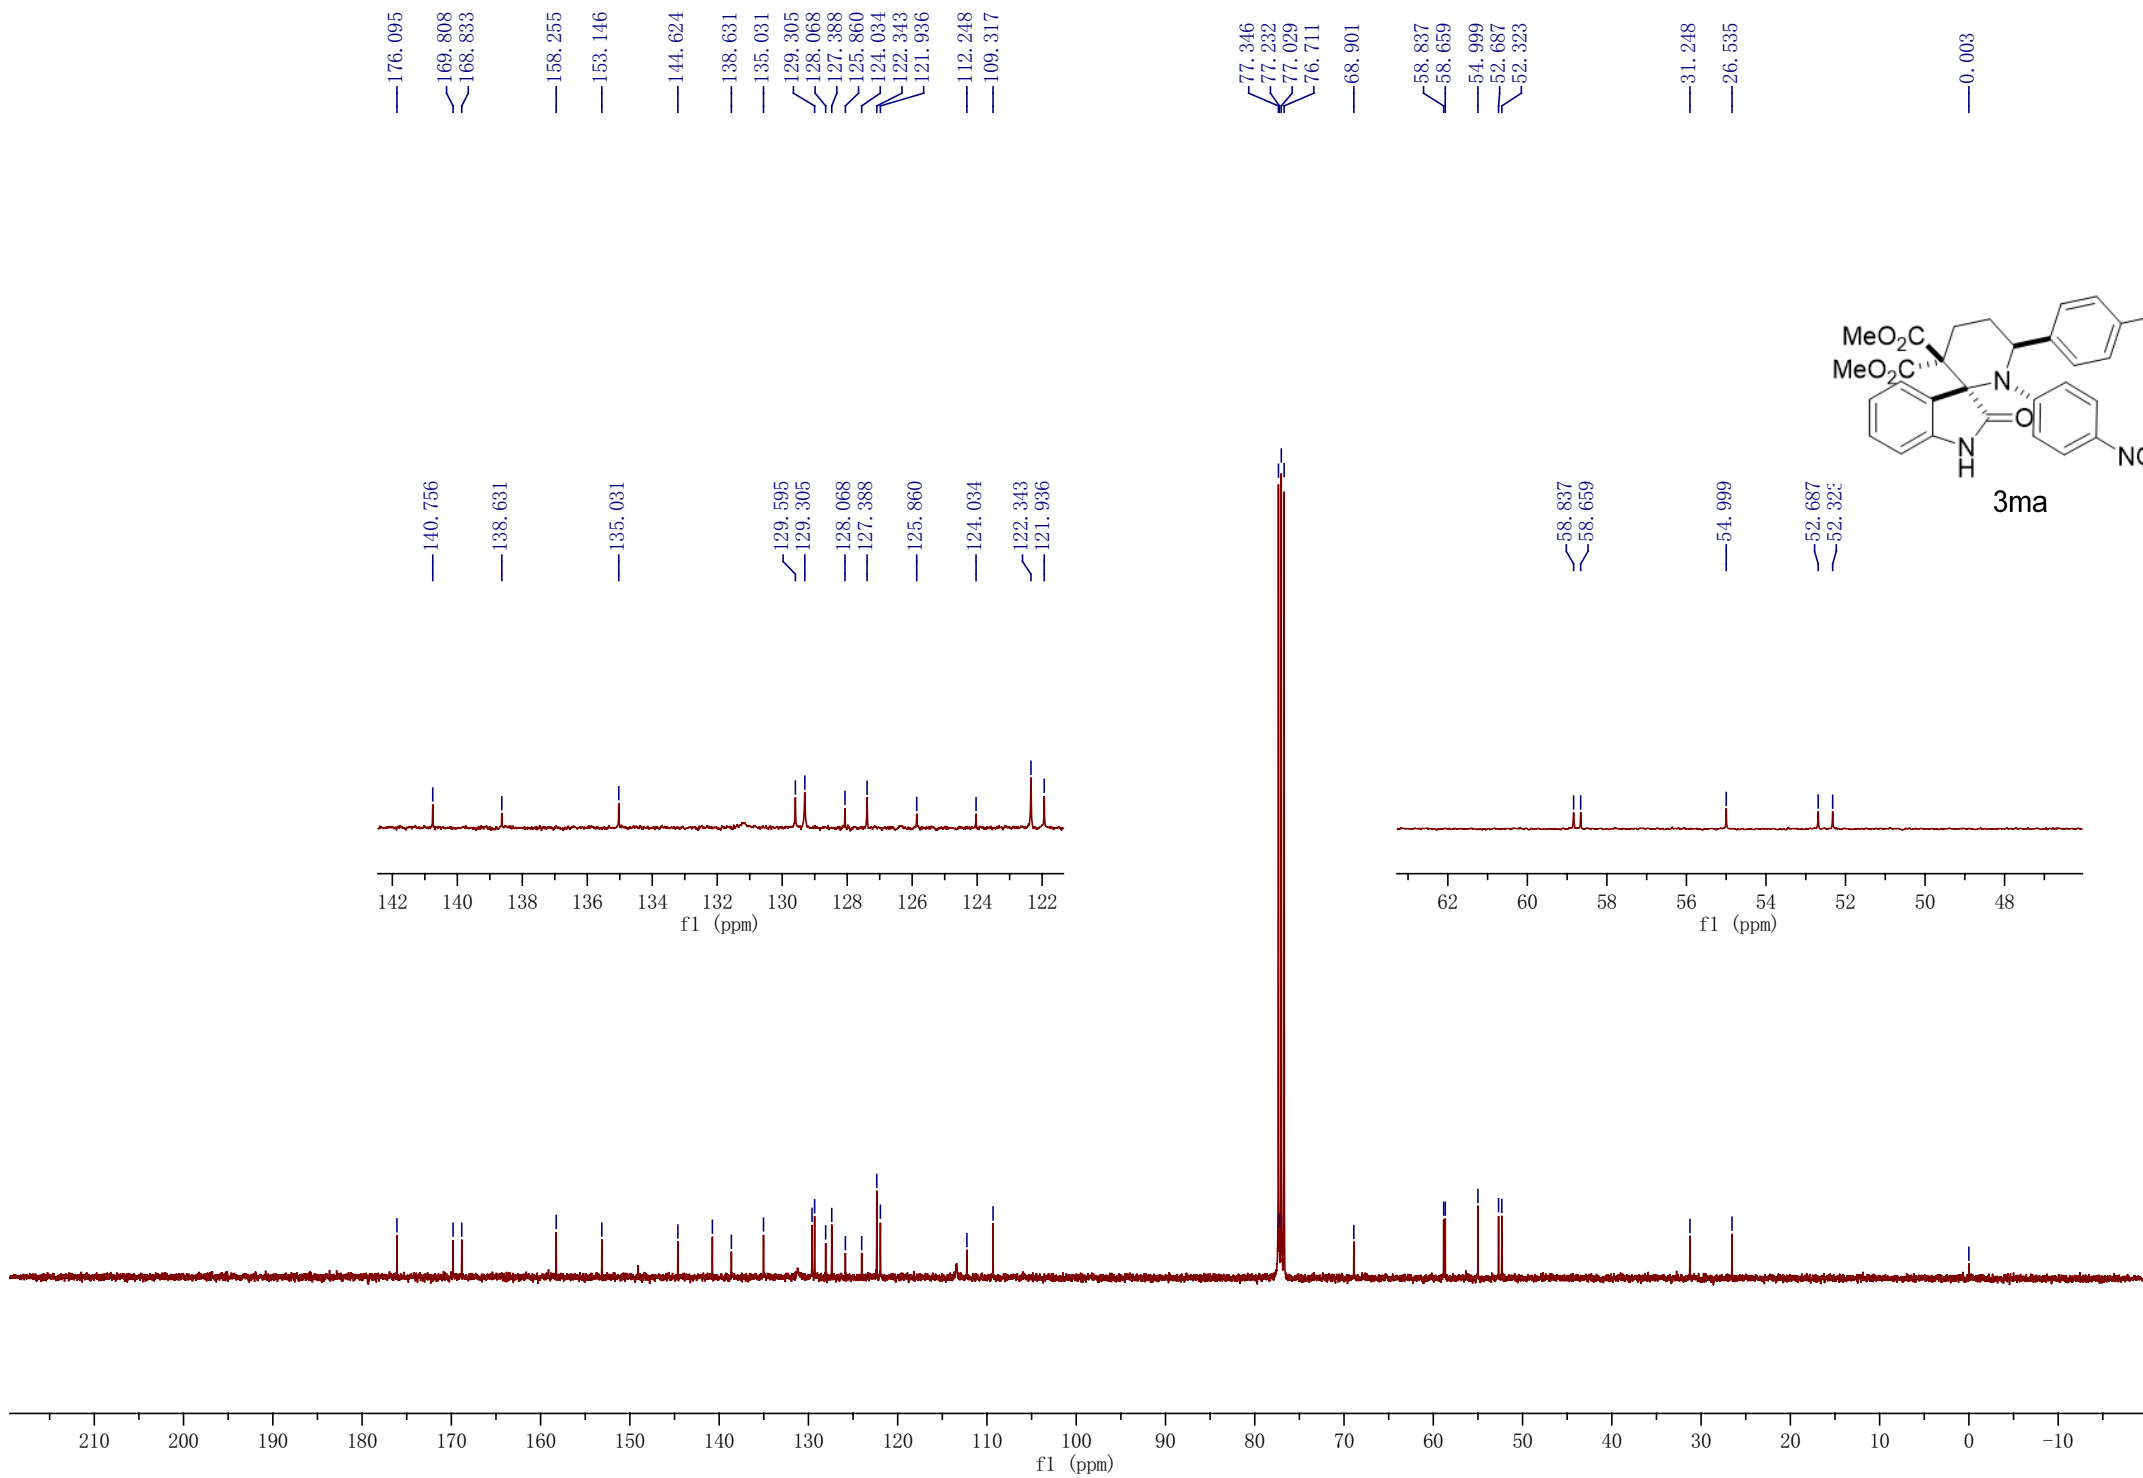



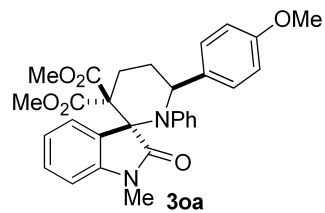

7.389  
7.369  
7.260  
7.024  
7.023  
6.883  
6.790  
6.614  
6.565  
6.319  
6.299

5.196  
5.187  
5.166  
5.157

3.844  
3.836  
3.361  
3.337  
3.326  
2.937  
2.627  
2.598  
2.558  
2.366  
1.996  
1.985  
1.979  
1.968  
1.962  
1.951  
1.945  
1.934

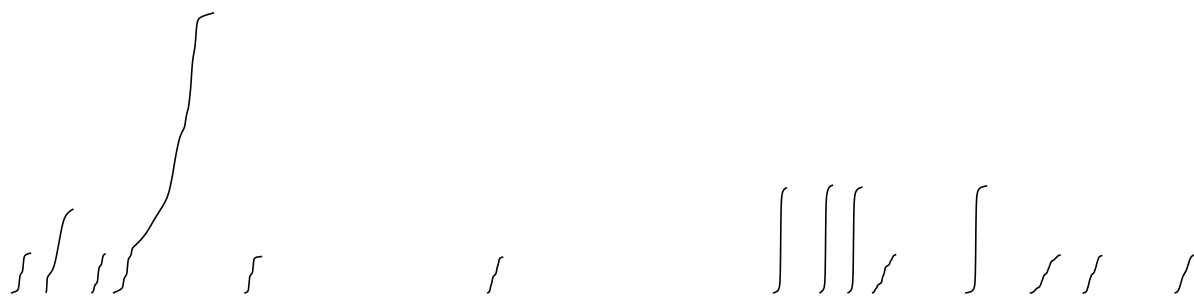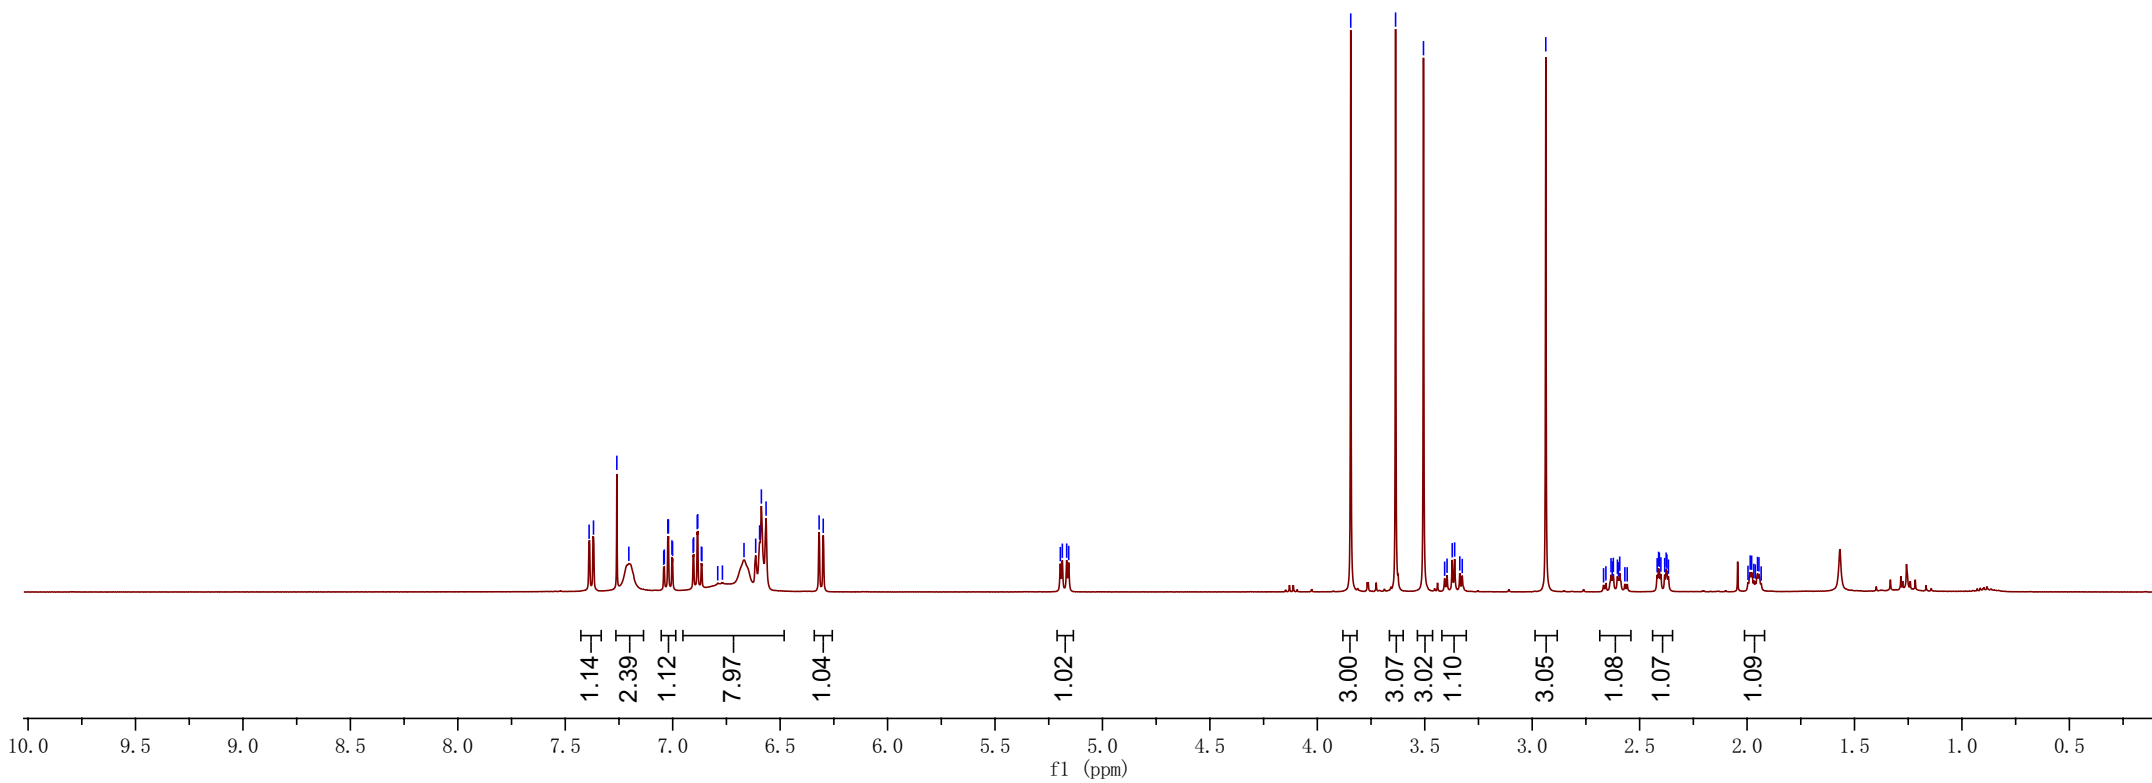

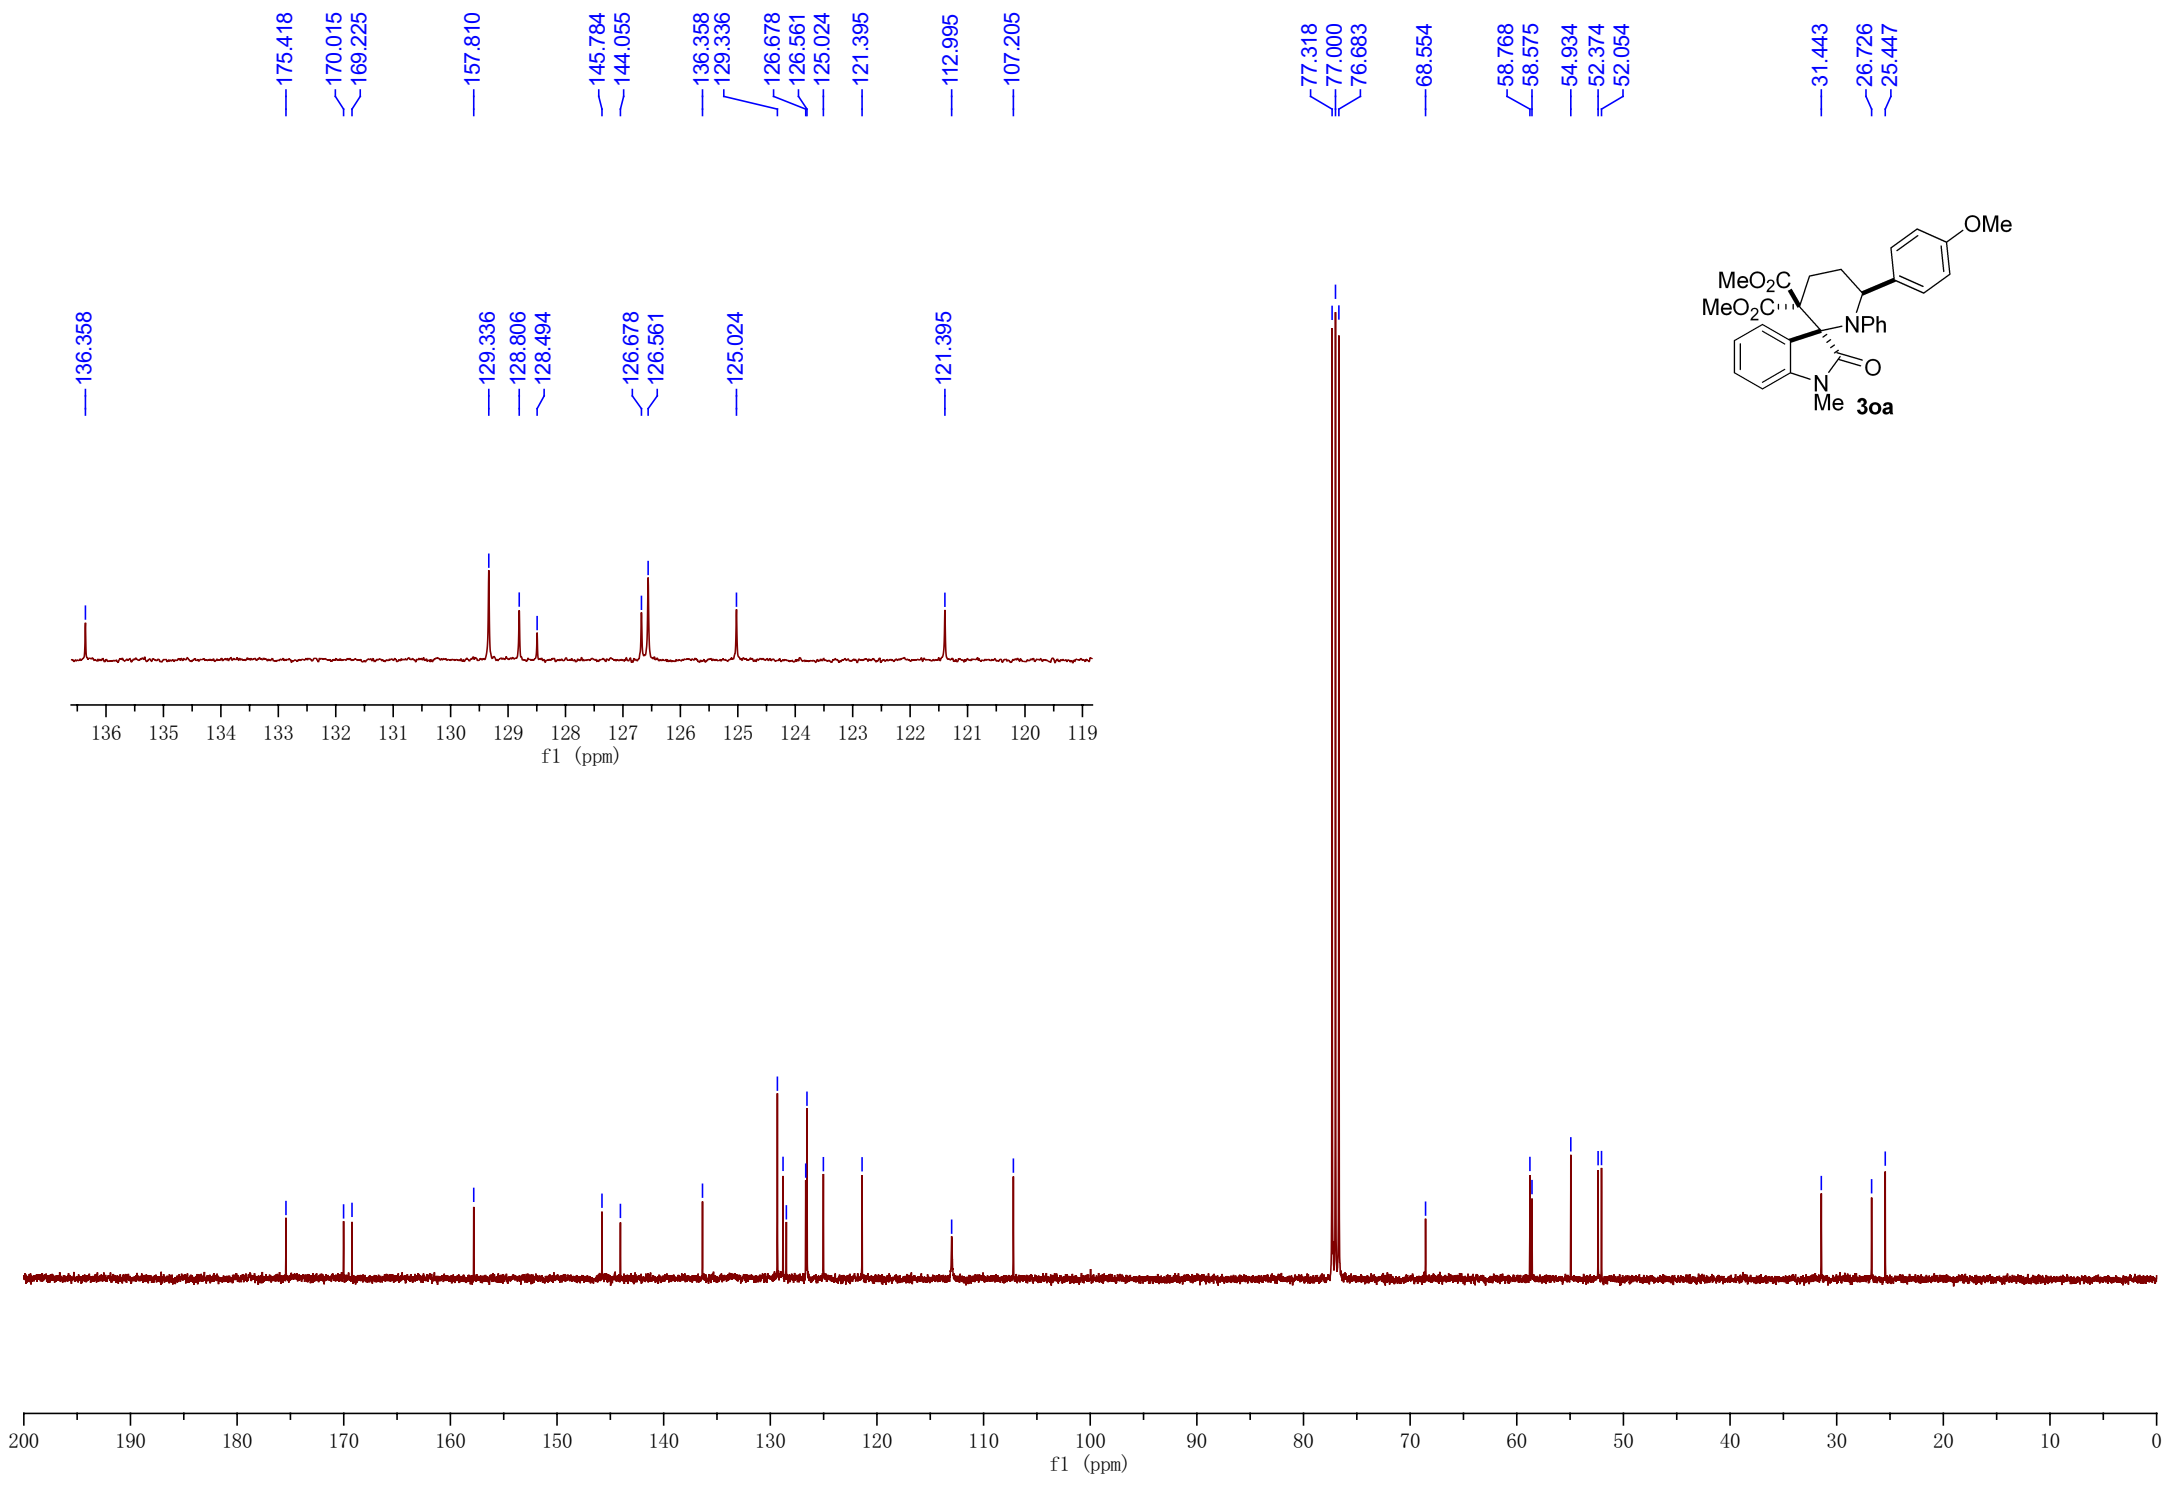

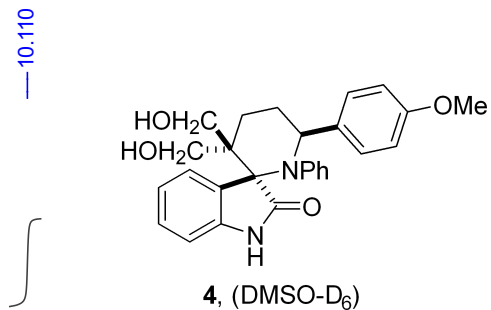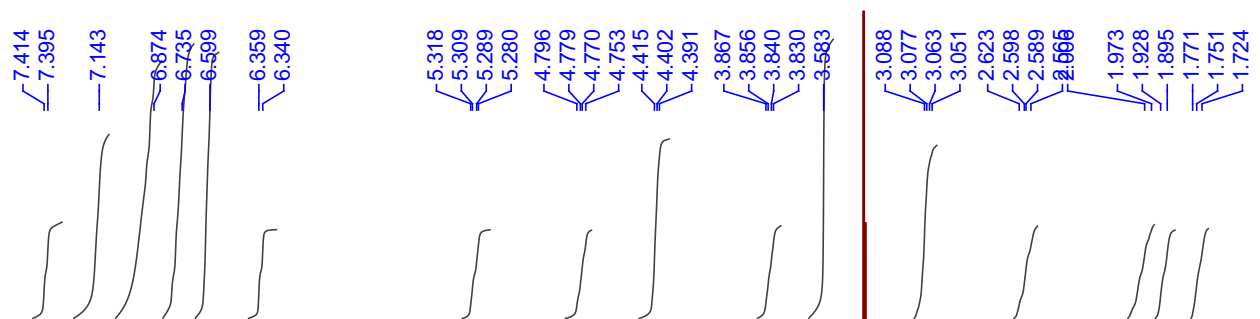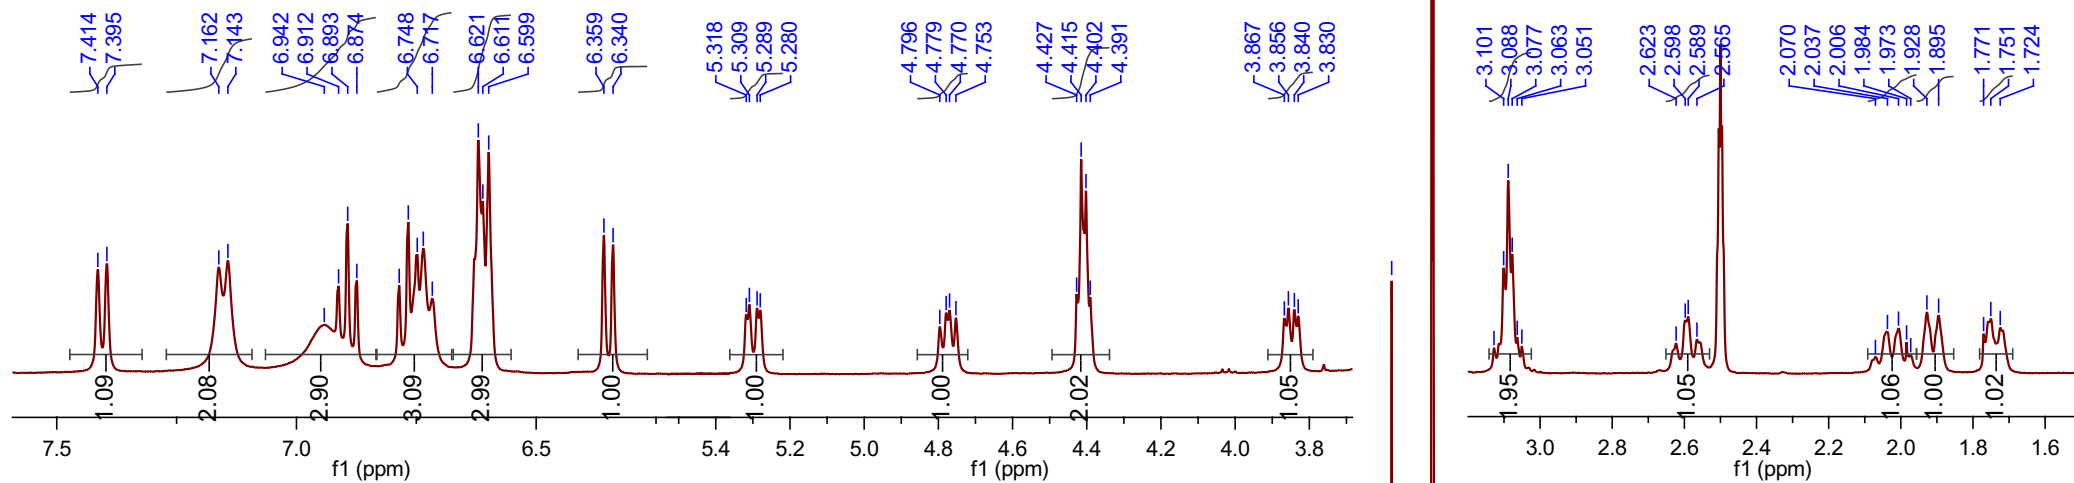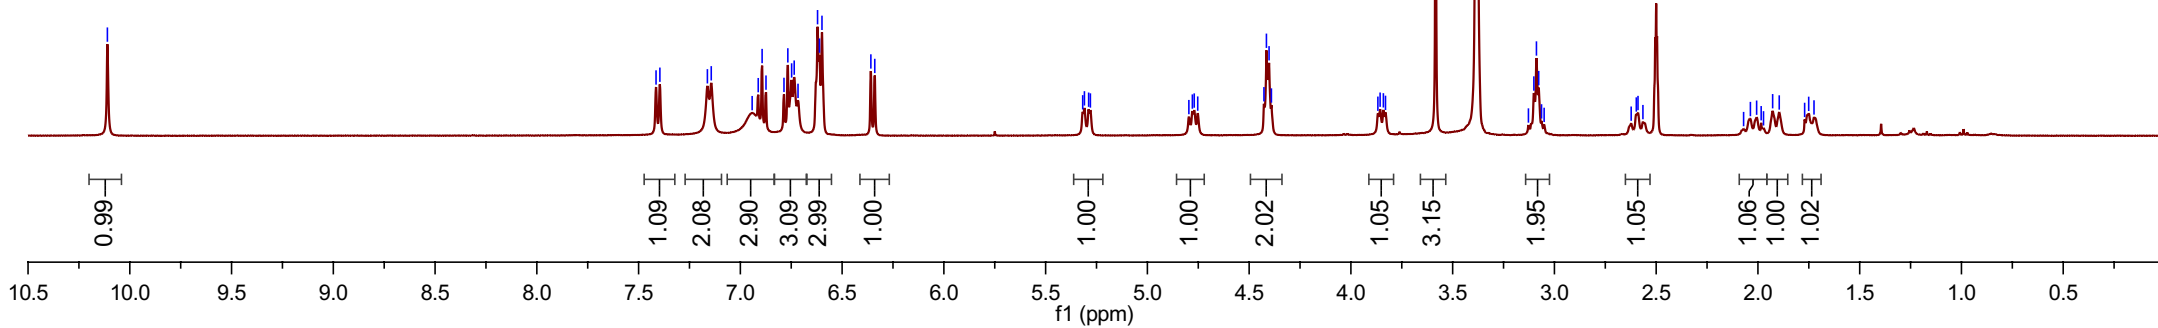

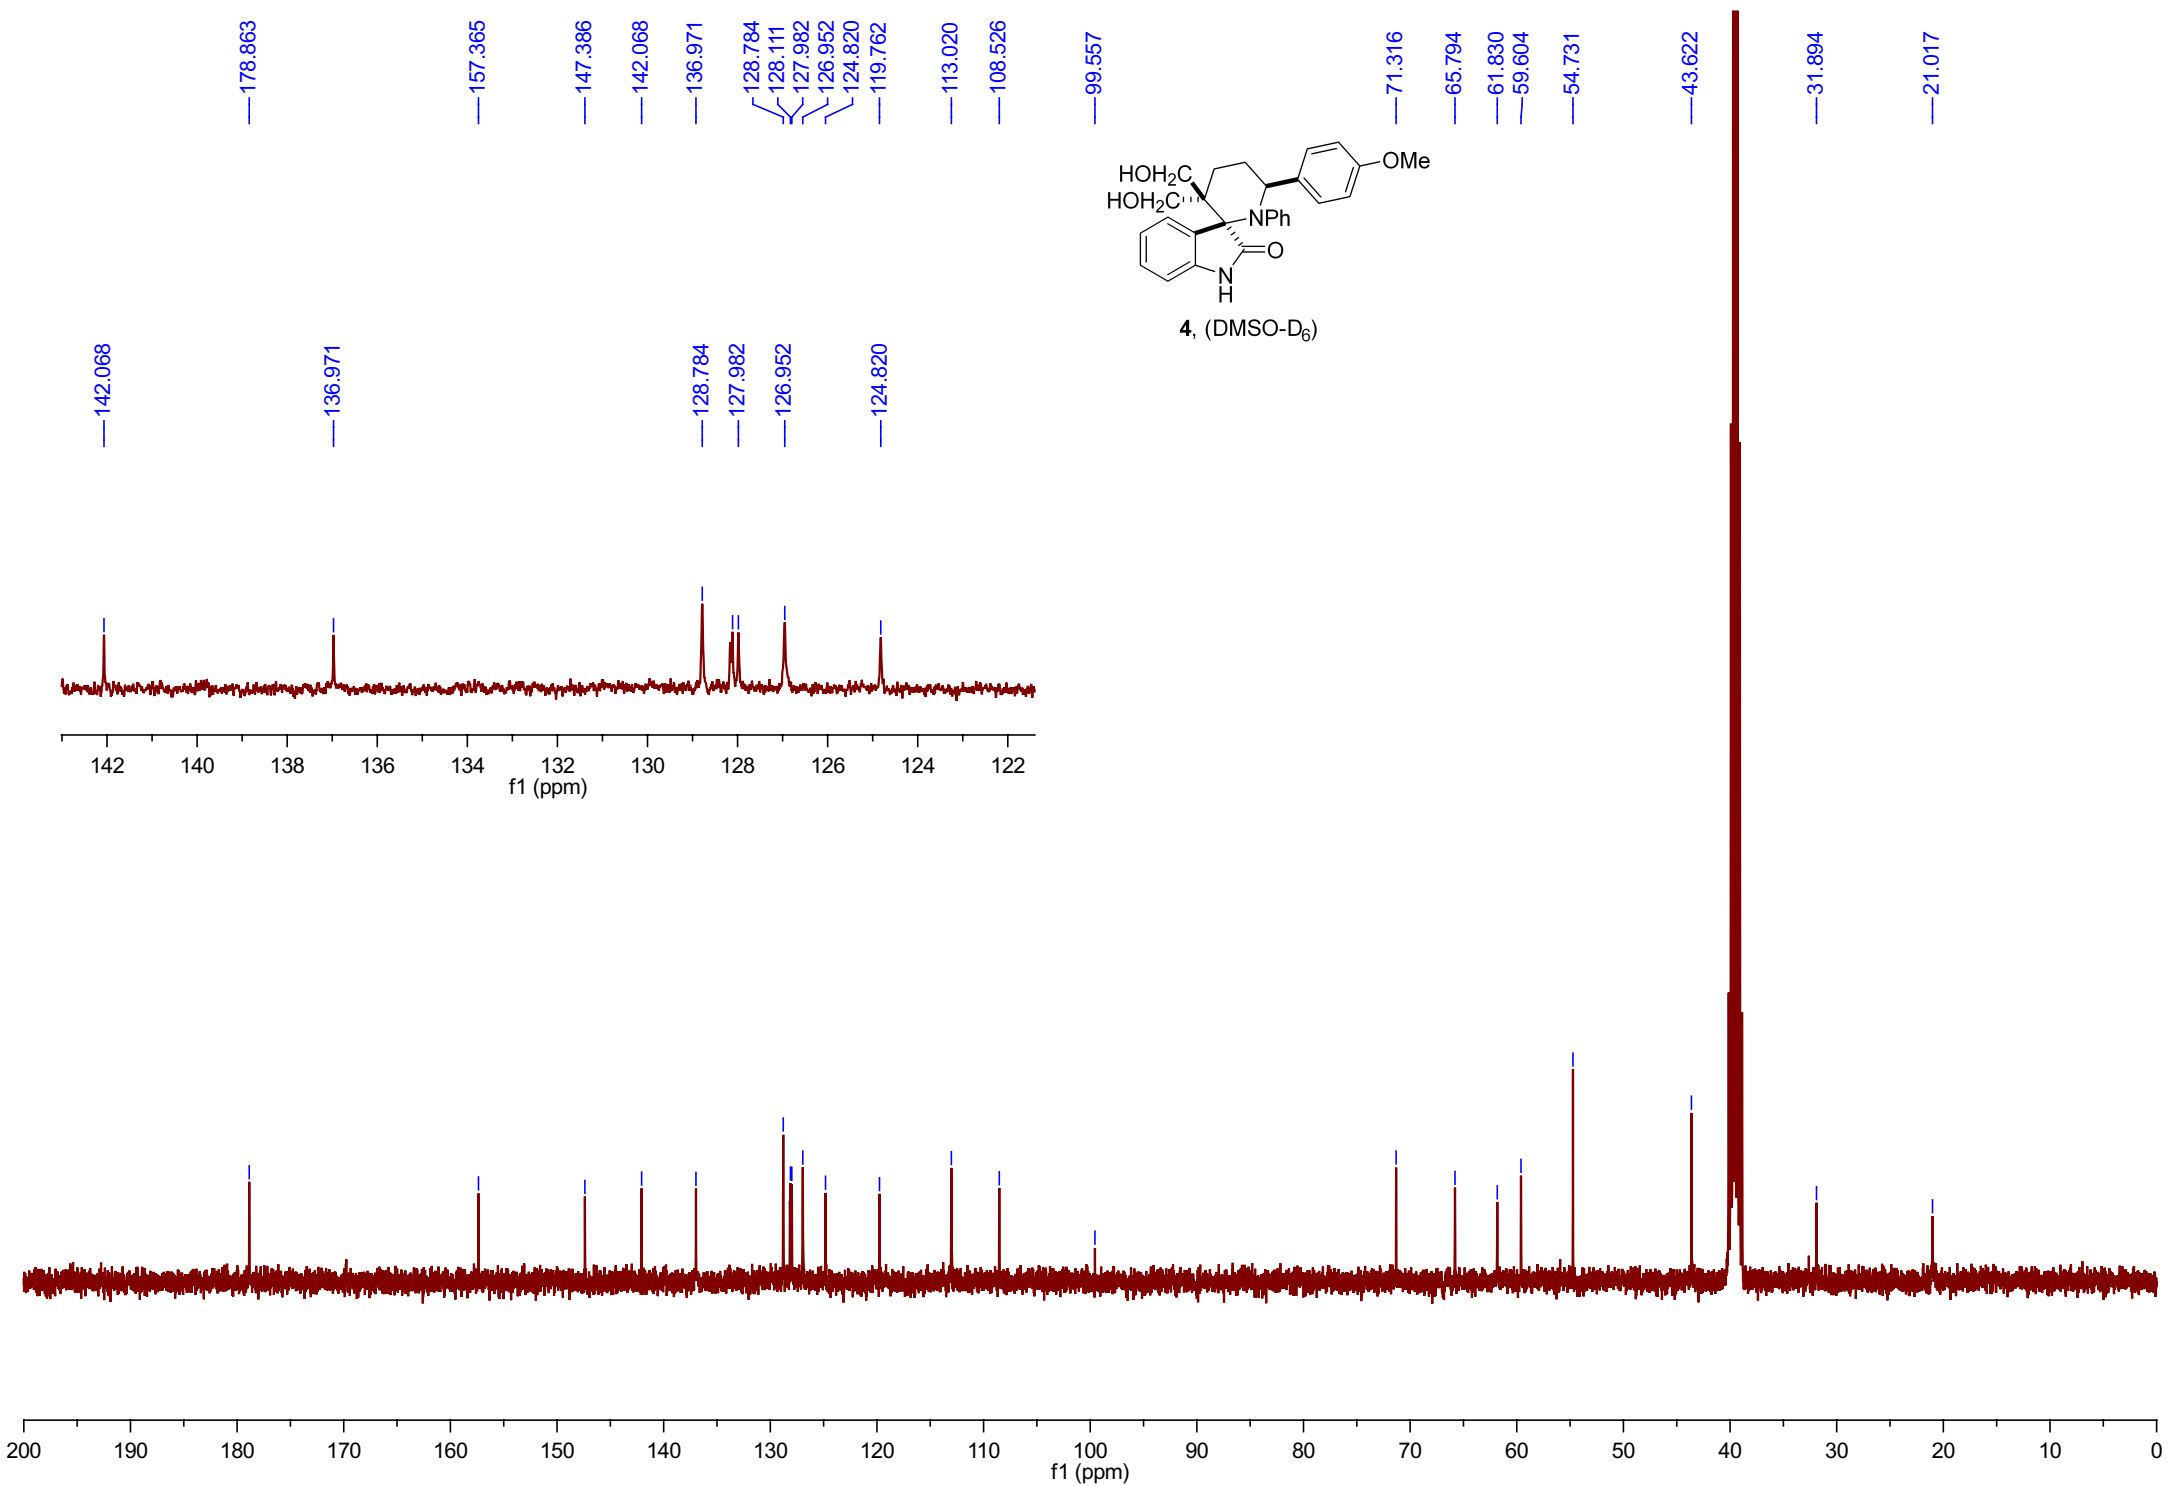

Sample Name: RFC-rac

```

=====
Acq. Operator   : SYSTEM                      Seq. Line :    2
Sample Operator : SYSTEM
Acq. Instrument : 1260                      Location  : P1-A-01
Injection Date  : 11/1/2021 11:42:26 AM      Inj       :    1
                                           Inj Volume: 1.000 µl

Acq. Method     : E:\赵老师课题组\LC\数据\znh\RFC-1 2021-11-01 11-10-36\ZMH-ADH-98-2 -0.6-30
                 min_LC.M
Last changed    : 11/1/2021 11:11:18 AM by SYSTEM
Analysis Method : E:\赵老师课题组\LC\数据\znh\RFC-1 2021-11-01 11-10-36\ZMH-ADH-98-2 -0.6-30
                 min_LC.M (Sequence Method)
Last changed    : 11/1/2021 12:31:36 PM by SYSTEM
Additional Info : Peak(s) manually integrated
  
```

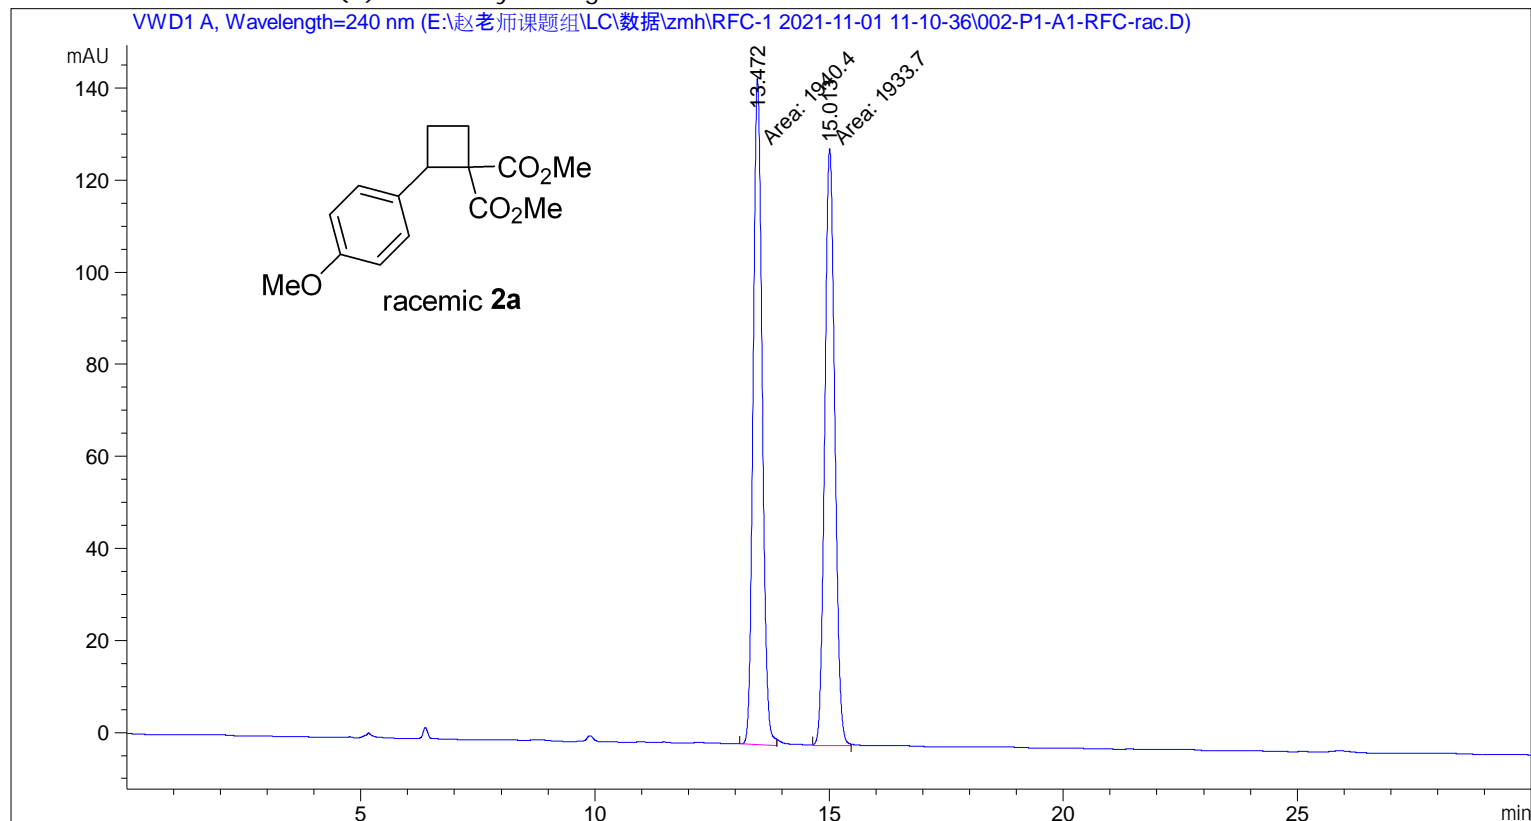

```

=====
                          Area Percent Report
=====
  
```

```

Sorted By      :      Signal
Multiplier     :      1.0000
Dilution       :      1.0000
Use Multiplier & Dilution Factor with ISTDs
  
```

Signal 1: VWD1 A, Wavelength=240 nm

| Peak # | RetTime [min] | Type | Width [min] | Area [mAU*s] | Height [mAU] | Area %  |
|--------|---------------|------|-------------|--------------|--------------|---------|
| 1      | 13.472        | MM   | 0.2236      | 1940.40222   | 144.63777    | 50.0865 |
| 2      | 15.013        | MM   | 0.2485      | 1933.69824   | 129.68158    | 49.9135 |

```
Totals :                      3874.10046  274.31935
```

Sample Name: HMF-3-121

```

=====
Acq. Operator   : SYSTEM                      Seq. Line :    2
Sample Operator : SYSTEM
Acq. Instrument : 1260                        Location  : P1-A-01
Injection Date  : 11/11/2021 10:04:05 AM      Inj       :    1
                                           Inj Volume: 1.000 µl
Acq. Method     : E:\赵老师课题组\LC\数据\znh\HMF-3-121 2021-11-11 09-59-16\ZMH-ADH-98-2 -0.6
                                           -30 min_LC.M
Last changed    : 11/11/2021 10:06:25 AM by SYSTEM
                                           (modified after loading)
Analysis Method : E:\赵老师课题组\LC\数据\znh\HMF-3-121 2021-11-11 09-59-16\ZMH-ADH-98-2 -0.6
                                           -30 min_LC.M (Sequence Method)
Last changed    : 11/11/2021 10:32:43 AM by SYSTEM
Additional Info : Peak(s) manually integrated
=====

```

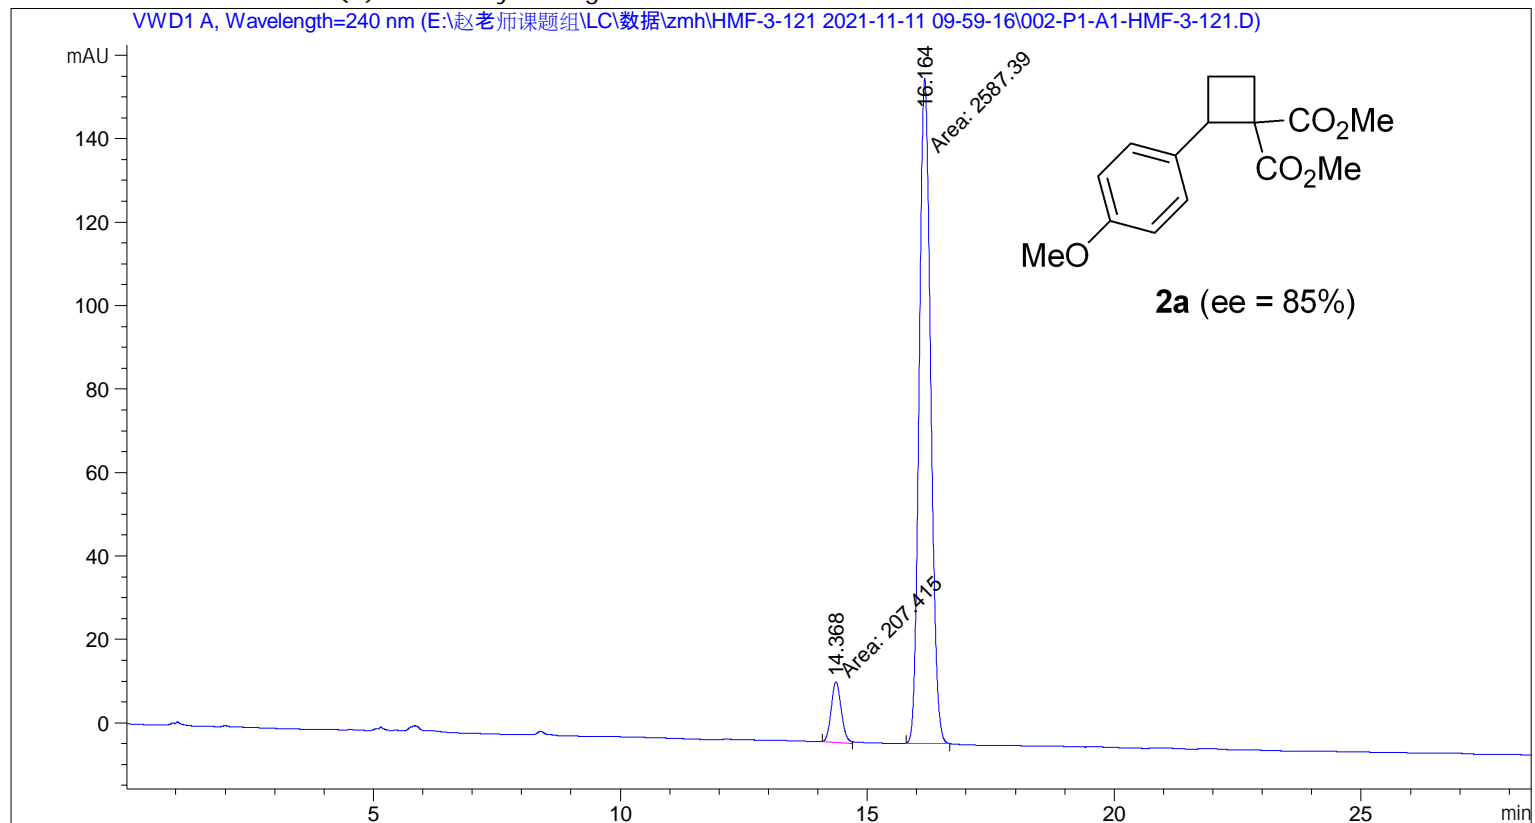

```

=====
                          Area Percent Report
=====

```

```

Sorted By           :      Signal
Multiplier          :      1.0000
Dilution            :      1.0000
Use Multiplier & Dilution Factor with ISTDs

```

Signal 1: VWD1 A, Wavelength=240 nm

| Peak # | RetTime [min] | Type | Width [min] | Area [mAU*s] | Height [mAU] | Area %  |
|--------|---------------|------|-------------|--------------|--------------|---------|
| 1      | 14.368        | MM   | 0.2374      | 207.41479    | 14.56042     | 7.4215  |
| 2      | 16.164        | MM   | 0.2705      | 2587.38501   | 159.41397    | 92.5785 |

```
Totals :                      2794.79980  173.97439
```

```

=====
Acq. Operator   : SYSTEM                      Seq. Line :    2
Sample Operator : SYSTEM
Acq. Instrument : 1260                      Location  : P1-A-02
Injection Date  : 11/11/2021 10:44:17 AM    Inj       :    1
                                           Inj Volume: 1.000 µl

Acq. Method     : E:\赵老师课题组\LC\数据\zmh\YKY-2-61 2021-11-11 10-35-05\ADH-80-20-1.0-
                30min-240nm.M
Last changed    : 11/11/2021 11:22:36 AM by SYSTEM
                (modified after loading)
Analysis Method : E:\赵老师课题组\LC\数据\zmh\YKY-2-61 2021-11-11 10-35-05\ADH-80-20-1.0-
                30min-240nm.M (Sequence Method)
Last changed    : 11/11/2021 11:22:39 AM by SYSTEM
Additional Info  : Peak(s) manually integrated
    
```

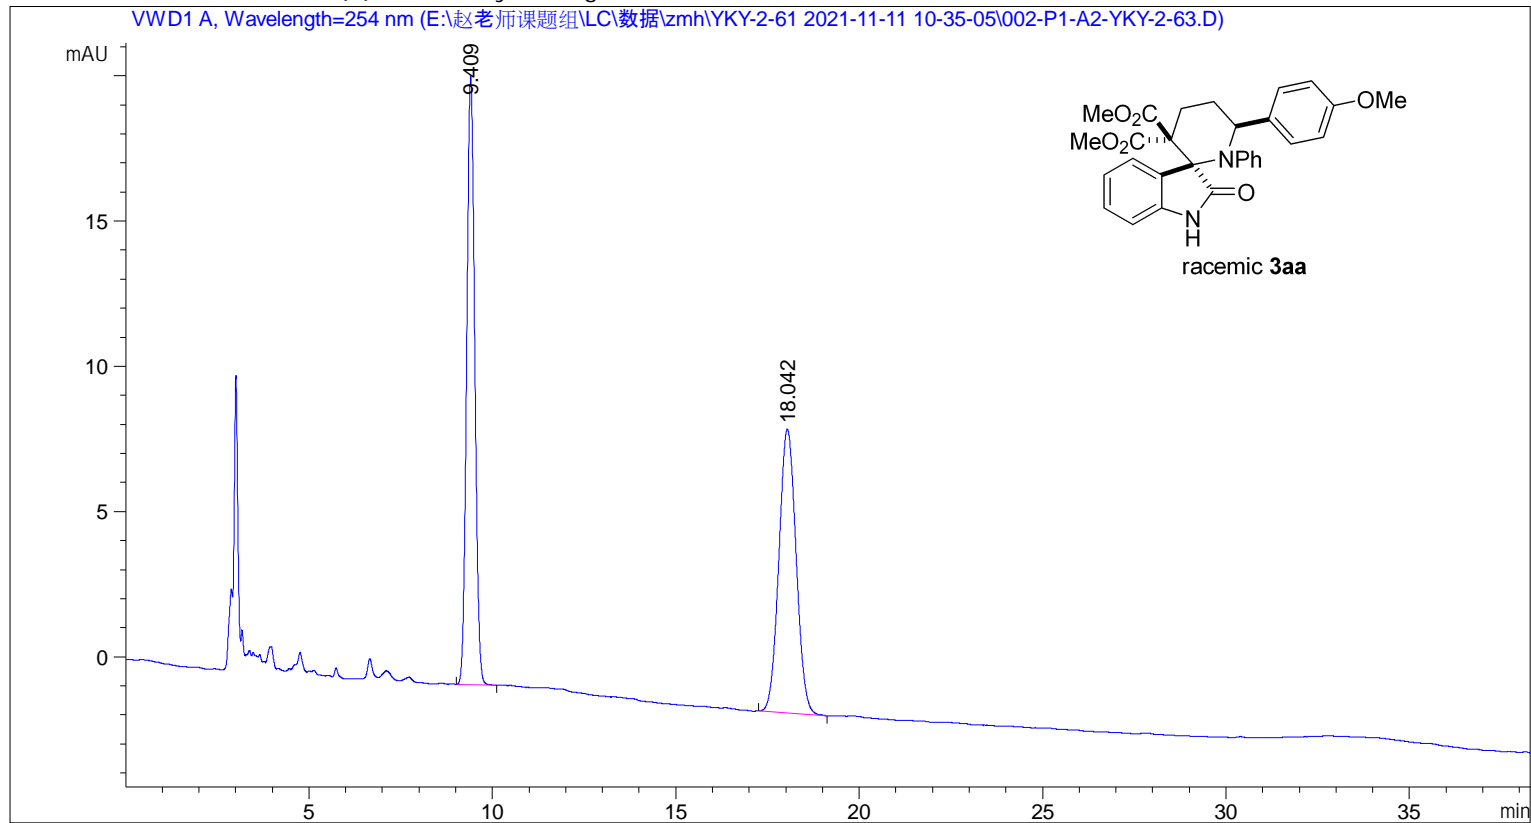

Area Percent Report

```

=====
Sorted By       :      Signal
Multiplier     :      1.0000
Dilution       :      1.0000
Use Multiplier & Dilution Factor with ISTDs
    
```

Signal 1: VWD1 A, Wavelength=254 nm

| Peak # | RetTime [min] | Type | Width [min] | Area [mAU*s] | Height [mAU] | Area %  |
|--------|---------------|------|-------------|--------------|--------------|---------|
| 1      | 9.409         | BB   | 0.2372      | 319.91473    | 20.94012     | 50.0676 |
| 2      | 18.042        | BB   | 0.5078      | 319.05035    | 9.77391      | 49.9324 |

Totals :                      638.96509    30.71403
